# Supplementary material for: Metal-free alcohol-directed regioselective heteroarylation of remote unactivated C(sp3)–H bonds
Source: PubMed Central journal article supplement (PMC6104081; doi:10.1038/s41467-018-05522-9), 2018-08-21
Supplement: 41467_2018_5522_MOESM1_ESM.pdf [file 41467_2018_5522_MOESM1_ESM.pdf]

Supplementary Information

**Metal-Free Alcohol-Directed Regioselective Heteroarylation of  
Remote Unactivated C(sp<sup>3</sup>)-H Bonds**

Wu et al.

## Supplementary Methods

All reactions were maintained under a nitrogen atmosphere unless otherwise stated. Commercially available reagents were used without further purification. Infrared (FT-IR) spectra were recorded on a BRUKER VERTEX 70,  $\nu_{\text{max}}$  in  $\text{cm}^{-1}$ .  $^1\text{H-NMR}$  spectra were recorded on a BRUKER AVANCE III HD (400 MHz) spectrometer. Chemical shifts are reported in ppm from tetramethylsilane with the solvent resonance as internal standard ( $\text{CDCl}_3$ ;  $\delta$  7.26). Data are reported as follows: chemical shift, multiplicity (s = singlet, d = doublet, t = triplet, q = quadruplet, br = broad, m = multiplet), coupling constants (Hz) and integration.  $^{13}\text{C-NMR}$  spectra were recorded on a BRUKER AVANCE III HD (100 MHz) spectrometer with complete proton decoupling. Chemical shifts are reported in ppm from tetramethylsilane with the solvent resonance as the internal standard ( $\text{CDCl}_3$ ;  $\delta$  77.16).  $^{19}\text{F-NMR}$  spectra were recorded on a BRUKER AVANCE III HD (376 MHz) spectrometer. Mass spectra were measured with an Agilent Technologies 6120 Quadrupole LC/MS. High resolution mass spectrometry (HRMS) were measured with a GCT Premier<sup>TM</sup> and BRUKER micrOTF-Q III. Melting points were measured using INESA WRR and values are uncorrected.

**General procedure for the remote C(sp<sup>3</sup>)-H bond heteroarylation.** Heteroaryl **1** (0.4 mmol) and alcohol **2** (2.0 mmol) were loaded in a reaction vial which was subjected to evacuation/flushing with  $\text{N}_2$  three times. Then DCM (2.0 mL) followed by PIFA (0.92 mmol) was added to the mixture. The reaction was irradiated with 100 W blue LEDs and kept at rt under fan cooling (see the photos below). After the reaction completion monitored by TLC, the mixture was quenched by addition of aq. KOH until  $\text{pH} > 8$  and then extracted with ethyl acetate (3 x 10 mL). The combined organic extracts were washed by brine, dried over  $\text{Na}_2\text{SO}_4$ , filtered, concentrated, and purified by flash column chromatography on silica gel (eluent: ethyl acetate/ petroleum ether) to give the desired product **3**.

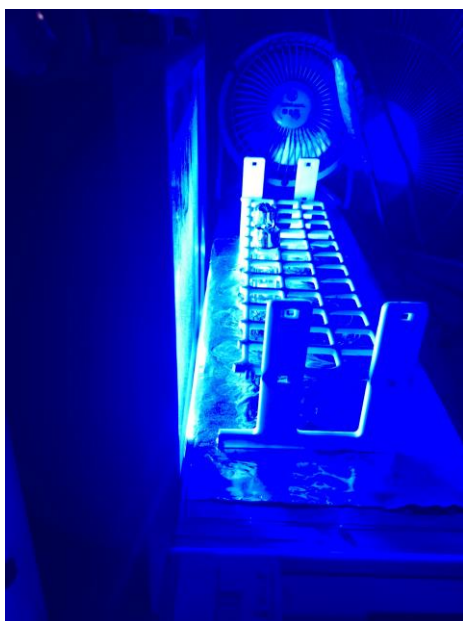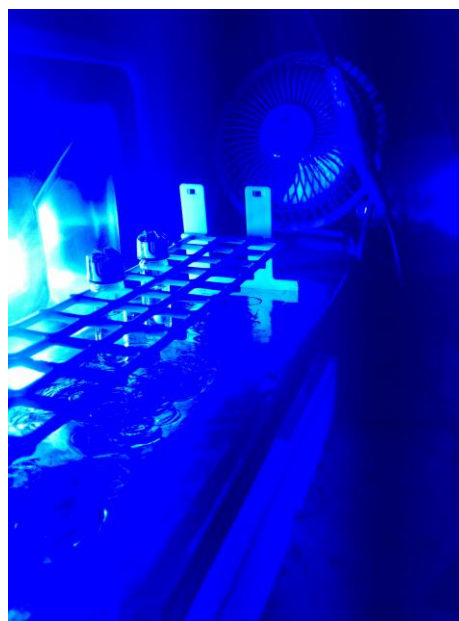

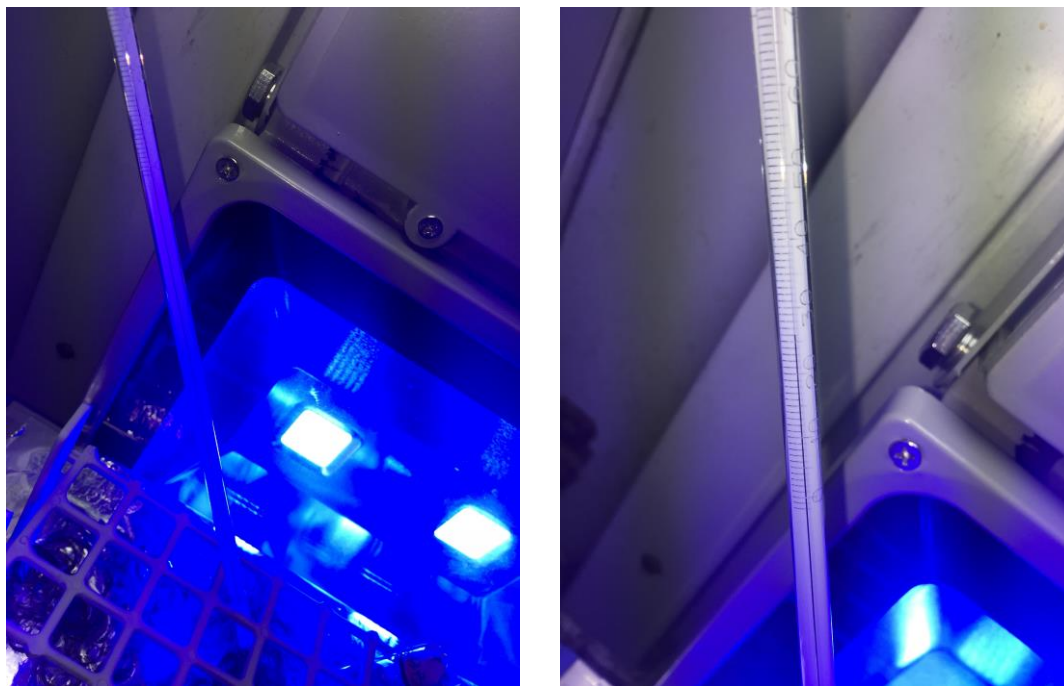

**Supplementary Figure 1. Reaction equipment**

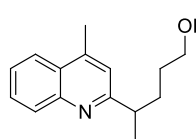

**3a:** yellow oil.  $^1\text{H NMR}$  (400 MHz,  $\text{CDCl}_3$ )  $\delta$  8.03 (d,  $J = 8.4$  Hz, 1H), 7.92 (dd,  $J = 8.0, 0.8$  Hz, 1H), 7.64 (ddd,  $J = 8.0, 6.8, 1.2$  Hz, 1H), 7.48 (ddd,  $J = 8.4, 6.8, 1.2$  Hz, 1H), 7.13 (s, 1H), 3.66-3.55 (m, 2H), 3.22 (br, 1H), 3.14-3.03 (m, 1H), 2.66 (s, 3H), 1.97-1.86 (m, 1H), 1.80-1.69 (m, 1H), 1.68-1.55 (m, 1H), 1.53-1.40 (m, 1H), 1.35 (d,  $J = 6.8$  Hz, 3H);  $^{13}\text{C NMR}$  (100 MHz,  $\text{CDCl}_3$ )  $\delta$  165.8, 146.8, 144.2, 128.7, 128.6, 126.5, 125.1, 123.1, 119.7, 61.9, 41.7, 32.5, 30.2, 20.5, 18.4. FT-IR:  $\nu$  ( $\text{cm}^{-1}$ ) 3307, 2931, 2867, 1736, 1602, 1561, 1509, 1448, 1377, 1343, 1240. HRMS [ESI] calcd for  $\text{C}_{15}\text{H}_{20}\text{NO}$   $[\text{M}+\text{H}]^+$  230.1539, found 230.1540.

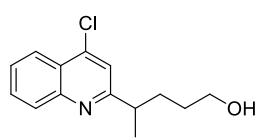

**3b:** yellow oil.  $^1\text{H NMR}$  (400 MHz,  $\text{CDCl}_3$ )  $\delta$  8.12 (dd,  $J = 8.4, 0.8$  Hz, 1H), 8.01 (d,  $J = 8.4$  Hz, 1H), 7.67 (ddd,  $J = 8.4, 6.8, 1.2$  Hz, 1H), 7.52 (ddd,  $J = 8.0, 6.8, 0.8$  Hz, 1H), 7.36 (s, 1H), 3.59 (t,  $J = 6.4$  Hz, 2H), 3.33 (s, 1H), 3.11-3.01 (m, 1H), 1.92-1.82 (m, 1H), 1.77-1.67 (m, 1H), 1.64-1.53 (m, 1H), 1.50-1.39 (m, 1H), 1.32 (d,  $J = 6.8$  Hz, 3H);  $^{13}\text{C NMR}$  (100 MHz,  $\text{CDCl}_3$ ) 166.7, 148.3, 143.0, 130.3, 129.0, 126.8, 125.1, 123.9, 119.7, 62.2, 42.2, 33.0, 30.6, 20.7. FT-IR:  $\nu$  ( $\text{cm}^{-1}$ ) 2959, 2932, 2869, 2361, 2342, 1615, 1589, 1553. HRMS [ESI] calcd for  $\text{C}_{14}\text{H}_{17}\text{ClNO}$   $[\text{M}+\text{H}]^+$  250.0993, found 250.0995.

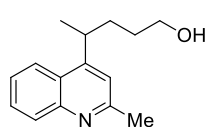

**3c:** yellow oil.  $^1\text{H NMR}$  (400 MHz,  $\text{CDCl}_3$ )  $\delta$  8.01-7.95 (m, 2H), 7.58 (ddd,  $J = 8.4, 6.8, 1.2$  Hz, 1H), 7.41 (ddd,  $J = 8.0, 6.8, 0.8$  Hz, 1H), 7.11 (s, 1H), 3.68 (br, 1H), 3.60 (t,  $J = 6.4$  Hz, 2H), 3.57-3.46 (m, 1H), 2.63 (s, 3H), 1.88-1.66 (m, 2H), 1.64-1.43 (m, 2H), 1.30 (d,  $J = 6.8$  Hz, 3H);  $^{13}\text{C NMR}$  (100 MHz,  $\text{CDCl}_3$ )  $\delta$  158.1, 153.2, 147.4, 128.6, 128.5, 125.0, 122.3, 118.0, 61.7, 33.0, 32.6, 30.2, 24.7, 20.7. FT-IR:  $\nu$  ( $\text{cm}^{-1}$ ) 2963, 2934, 2862, 1598, 1562, 1509, 1458, 1415. HRMS [ESI] calcd for

C<sub>15</sub>H<sub>20</sub>NO [M+H]<sup>+</sup> 230.1539, found 230.1536.

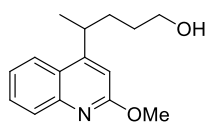

**3d:** yellow oil. <sup>1</sup>H NMR (400 MHz, CDCl<sub>3</sub>) δ 7.95 (d, *J* = 8.0 Hz, 1H), 7.88 (dd, *J* = 8.4, 0.8 Hz, 1H), 7.60 (ddd, *J* = 8.0, 6.8, 1.2 Hz, 1H), 7.38 (ddd, *J* = 8.4, 7.2, 1.2 Hz, 1H), 6.80 (s, 1H), 4.06 (s, 3H), 3.60 (t, *J* = 6.4 Hz, 2H), 3.55-3.45 (m, 1H), 2.26 (br, 1H), 1.90-1.78 (m, 1H), 1.78-1.67 (m, 1H), 1.64-1.48 (m, 2H), 1.35 (d, *J* = 6.8 Hz, 3H); <sup>13</sup>C NMR (100 MHz, CDCl<sub>3</sub>) δ 162.6, 155.9, 147.2, 129.1, 128.1, 124.3, 123.8, 123.0, 109.2, 62.7, 53.2, 33.2, 33.2, 30.6, 21.1. FT-IR: ν (cm<sup>-1</sup>) 3348, 3070, 2940, 2869, 2361, 2341, 1717, 1606. HRMS [ESI] calcd for C<sub>15</sub>H<sub>20</sub>NO<sub>2</sub> [M+H]<sup>+</sup> 246.1489, found 246.1485.

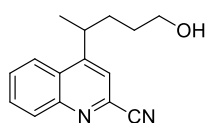

**3e:** yellow oil. <sup>1</sup>H NMR (400 MHz, CDCl<sub>3</sub>) δ 8.17-8.12 (m, 2H), 7.79 (ddd, *J* = 8.4, 6.8, 1.2 Hz, 1H), 7.69 (ddd, *J* = 8.4, 6.8, 1.2 Hz, 1H), 7.58 (s, 1H), 3.71-3.62 (m, 3H), 1.95-1.75 (m, 3H), 1.67-1.57 (m, 1H), 1.57-1.46 (m, 1H), 1.40 (d, *J* = 6.8 Hz, 3H); <sup>13</sup>C NMR (100 MHz, CDCl<sub>3</sub>) δ 155.5, 147.9, 133.1, 130.4, 130.2, 128.7, 127.3, 122.6, 119.7, 117.4, 61.9, 33.0, 32.9, 30.0, 20.6. FT-IR: ν (cm<sup>-1</sup>) 3367, 2935, 2871, 2235, 1614, 1584, 1551, 1457, 1370, 1229. HRMS [ESI] calcd for C<sub>15</sub>H<sub>17</sub>N<sub>2</sub>O [M+H]<sup>+</sup> 241.1335, found 241.1330.

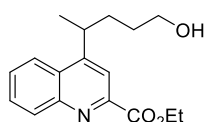

**3f:** yellow oil. <sup>1</sup>H NMR (400 MHz, CDCl<sub>3</sub>) δ 8.27 (dd, *J* = 8.8, 0.8 Hz, 1H), 8.08 (d, *J* = 8.4 Hz, 1H), 8.03 (s, 1H), 7.69 (ddd, *J* = 8.0, 6.8, 0.8 Hz, 1H), 7.58 (ddd, *J* = 8.4, 6.8, 1.2 Hz, 1H), 4.50 (q, *J* = 7.2 Hz, 2H), 3.66-3.56 (m, 3H), 2.38 (s, 1H), 1.92-1.70 (m, 2H), 1.63-1.47 (m, 2H), 1.44 (t, *J* = 7.2 Hz, 3H), 1.36 (d, *J* = 7.2 Hz, 3H); <sup>13</sup>C NMR (100 MHz, CDCl<sub>3</sub>) δ 165.3, 154.7, 147.4, 147.3, 131.1, 129.2, 127.8, 127.7, 122.4, 117.0, 62.0, 61.7, 33.0, 32.9, 30.1, 20.7, 13.9. FT-IR: ν (cm<sup>-1</sup>) 2965, 2936, 2872, 2359, 2339, 2236, 1718, 1509. HRMS [ESI] calcd for C<sub>17</sub>H<sub>22</sub>NO<sub>3</sub> [M+H]<sup>+</sup> 288.1594, found 288.1597.

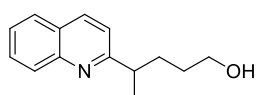

**3g-o:** yellow oil. <sup>1</sup>H NMR (400 MHz, CDCl<sub>3</sub>) δ 8.08 (d, *J* = 8.8 Hz, 1H), 8.04 (d, *J* = 8.8 Hz, 1H), 7.78-7.75 (m, 1H), 7.67 (ddd, *J* = 8.4, 6.8, 1.6 Hz, 1H), 7.48 (ddd, *J* = 8.0, 6.8, 1.2 Hz, 1H), 7.31 (d, *J* = 8.4 Hz, 1H), 3.67-3.56 (m, 2H), 3.19-3.10 (m, 1H), 2.77 (br, 1H), 1.99-1.89 (m, 1H), 1.82-1.72 (m, 1H), 1.68-1.57 (m, 1H), 1.53-1.40 (m, 1H), 1.37 (d, *J* = 6.8 Hz, 3H); <sup>13</sup>C NMR (100 MHz, CDCl<sub>3</sub>) δ 166.1, 147.0, 136.2, 129.0, 128.3, 127.0, 126.5, 125.3, 119.2, 62.1, 41.8, 32.5, 30.2, 20.6. FT-IR: ν (cm<sup>-1</sup>) 3059, 2959, 2932, 2868, 1717, 1619, 1601, 1562. HRMS [ESI] calcd for C<sub>14</sub>H<sub>18</sub>NO [M+H]<sup>+</sup> 216.1383, found 216.1384.

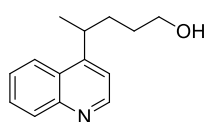

**3g-p:** yellow oil. <sup>1</sup>H NMR (400 MHz, CDCl<sub>3</sub>) δ 8.78 (d, *J* = 4.4 Hz, 1H), 8.12-8.08 (m, 2H), 7.68 (ddd, *J* = 8.0, 6.8, 1.2 Hz, 1H), 7.54 (ddd, *J* = 8.4, 7.2, 1.6 Hz, 1H), 7.26 (d, *J* = 4.8 Hz, 1H), 3.36 (t, *J* = 6.4 Hz, 2H), 3.67-3.58 (m, 1H), 2.48 (br, 1H), 1.95-1.74 (m, 2H), 1.66-1.48 (m, 2H), 1.38 (d, *J* = 6.8 Hz, 3H); <sup>13</sup>C NMR (100 MHz, CDCl<sub>3</sub>) δ 153.6, 150.1, 148.2, 130.2, 129.0, 127.2, 126.3, 123.0, 117.6, 62.6, 33.4, 33.2, 30.7, 21.3. FT-IR: ν (cm<sup>-1</sup>) 3274, 2960, 2932, 2864, 1721, 1588, 1572, 1509. HRMS [ESI] calcd for C<sub>14</sub>H<sub>18</sub>NO [M+H]<sup>+</sup> 216.1383, found 216.1383.



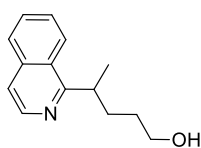

**3h:** yellow oil.  $^1\text{H}$  NMR (400 MHz,  $\text{CDCl}_3$ )  $\delta$  8.43 (d,  $J = 5.6$  Hz, 1H), 8.20 (d,  $J = 8.4$  Hz, 1H), 7.78 (d,  $J = 8.0$  Hz, 1H), 7.63 (ddd,  $J = 8.0, 6.8, 0.8$  Hz, 1H), 7.55 (ddd,  $J = 8.0, 6.8, 1.2$  Hz, 1H), 7.45 (d,  $J = 5.6$  Hz, 1H), 3.85-3.75 (m, 1H), 3.58-3.46 (m, 2H), 2.77 (br, 1H), 2.18-2.08 (m, 1H), 1.85-1.75 (m, 1H), 1.68-1.56 (m, 1H), 1.53-1.42 (m, 1H), 1.38 (d,  $J = 6.8$  Hz, 3H);  $^{13}\text{C}$  NMR (100 MHz,  $\text{CDCl}_3$ )  $\delta$  165.5, 141.7, 136.4, 129.7, 127.6, 127.0, 126.8, 124.7, 119.1, 62.6, 36.0, 32.1, 31.0, 21.2. FT-IR:  $\nu$  ( $\text{cm}^{-1}$ ) 3308, 3053, 2932, 2869, 1693, 1622, 1588, 1561. HRMS [ESI] calcd for  $\text{C}_{14}\text{H}_{18}\text{NO}$   $[\text{M}+\text{H}]^+$  216.1383, found 216.1379.

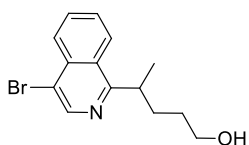

**3i:** yellow oil.  $^1\text{H}$  NMR (400 MHz,  $\text{CDCl}_3$ )  $\delta$  8.62 (s, 1H), 8.19 (d,  $J = 7.6$  Hz, 1H), 8.15 (d,  $J = 8.4$  Hz, 1H), 7.74 (ddd,  $J = 8.4, 7.2, 1.2$  Hz, 1H), 7.62 (ddd,  $J = 8.4, 6.8, 1.2$  Hz, 1H), 3.81-3.71 (m, 1H), 3.60-3.50 (m, 2H), 2.69 (br, 1H), 2.13-2.03 (m, 1H), 1.82-1.72 (m, 1H), 1.63-1.52 (m, 1H), 1.50-1.40 (m, 1H), 1.36 (d,  $J = 6.8$  Hz, 3H);  $^{13}\text{C}$  NMR (100 MHz,  $\text{CDCl}_3$ )  $\delta$  164.7, 143.0, 134.4, 130.5, 127.6, 127.5, 126.4, 124.6, 117.2, 62.1, 35.5, 31.7, 30.4, 20.6. FT-IR:  $\nu$  ( $\text{cm}^{-1}$ ) 3072, 3045, 2932, 2869, 1717, 1616, 1566, 1557. HRMS [ESI] calcd for  $\text{C}_{14}\text{H}_{17}\text{BrNO}$   $[\text{M}+\text{H}]^+$  294.0488, found 294.0486.

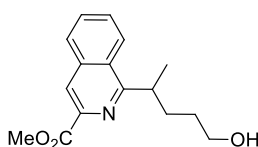

**3j:** yellow oil.  $^1\text{H}$  NMR (400 MHz,  $\text{CDCl}_3$ )  $\delta$  8.37 (s, 1H), 8.26-8.22 (m, 1H), 7.92-7.89 (m, 1H), 7.73-7.66 (m, 2H), 3.98 (s, 3H), 3.83-3.73 (m, 1H), 3.58-3.51 (m, 1H), 3.46-3.38 (m, 1H), 2.71 (br, 1H), 2.44-2.32 (m, 1H), 1.82-1.75 (m, 1H), 1.75-1.65 (m, 1H), 1.51-1.41 (m, 1H), 1.39 (d,  $J = 6.8$  Hz, 3H);  $^{13}\text{C}$  NMR (100 MHz,  $\text{CDCl}_3$ )  $\delta$  166.1, 165.3, 139.8, 135.6, 129.9, 128.8, 128.6, 127.6, 124.5, 122.2, 61.6, 52.2, 36.4, 30.6, 30.2, 21.2. FT-IR:  $\nu$  ( $\text{cm}^{-1}$ ) 3417, 2949, 2934, 2870, 2360, 2343, 2237, 1721. HRMS [ESI] calcd for  $\text{C}_{16}\text{H}_{20}\text{NO}_3$   $[\text{M}+\text{H}]^+$  274.1438, found 274.1442.

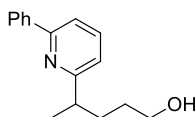

**3k-o:** yellow oil.  $^1\text{H}$  NMR (400 MHz,  $\text{CDCl}_3$ )  $\delta$  8.04-7.98 (m, 2H), 7.66 (t,  $J = 7.6$  Hz, 1H), 7.53 (dd,  $J = 8.0, 0.8$  Hz, 1H), 7.49-7.43 (m, 2H), 7.42-7.36 (m, 1H), 7.08 (dd,  $J = 7.6, 0.8$  Hz, 1H), 3.61 (td,  $J = 6.4, 2.0$  Hz, 2H), 3.06-2.95 (m, 1H), 2.59 (br, 1H), 1.95-1.84 (m, 1H), 1.76-1.66 (m, 1H), 1.63-1.54 (m, 1H), 1.53-1.46 (m, 1H), 1.35 (d,  $J = 7.2$  Hz, 3H);  $^{13}\text{C}$  NMR (100 MHz,  $\text{CDCl}_3$ )  $\delta$  165.5, 156.0, 139.2, 136.6, 128.3, 128.2, 126.5, 119.3, 117.4, 62.4, 41.1, 32.8, 30.2, 20.6. FT-IR:  $\nu$  ( $\text{cm}^{-1}$ ) 2958, 2931, 2868, 1720, 1590, 1570, 1461, 1445. HRMS [ESI] calcd for  $\text{C}_{16}\text{H}_{20}\text{NO}$   $[\text{M}+\text{H}]^+$  242.1539, found 242.1539.

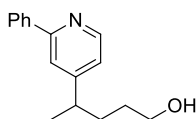

**3k-p:** yellow oil.  $^1\text{H}$  NMR (400 MHz,  $\text{CDCl}_3$ )  $\delta$  8.56 (d,  $J = 5.2$  Hz, 1H), 7.97-7.92 (m, 2H), 7.52 (s, 1H), 7.49-7.43 (m, 2H), 7.43-7.37 (m, 1H), 7.06 (dd,  $J = 5.2, 1.6$  Hz, 1H), 3.60 (t,  $J = 6.4$  Hz, 2H), 2.81-2.70 (m, 1H), 1.73-1.65 (m, 2H), 1.59-1.49 (m, 1H), 1.47-1.41 (m, 1H), 1.29 (d,  $J = 6.8$  Hz, 3H);  $^{13}\text{C}$  NMR (100 MHz,  $\text{CDCl}_3$ )  $\delta$  157.1, 156.7, 149.1, 139.1, 128.4, 128.2, 126.6, 120.6, 119.3, 62.2, 39.1, 33.3, 30.2, 21.1. FT-IR:  $\nu$  ( $\text{cm}^{-1}$ ) 3321, 3059, 2958, 2930, 2869, 2361, 2341, 1719. HRMS [ESI] calcd for  $\text{C}_{16}\text{H}_{20}\text{NO}$   $[\text{M}+\text{H}]^+$  242.1539, found 242.1537.

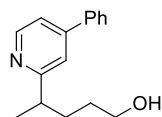

**3l:** yellow oil.  $^1\text{H NMR}$  (400 MHz,  $\text{CDCl}_3$ )  $\delta$  8.53 (d,  $J = 5.2$  Hz, 1H), 7.63-7.58 (m, 2H), 7.49-7.38 (m, 3H), 7.37-7.34 (m, 1H), 7.31 (dd,  $J = 5.2, 1.2$  Hz, 1H), 3.61 (t,  $J = 6.4$  Hz, 2H), 3.50 (br, 1H), 3.05-2.94 (m, 1H), 1.92-1.81 (m, 1H), 1.76-1.64 (m, 1H), 1.63-1.53 (m, 1H), 1.53-1.43 (m, 1H), 1.34 (d,  $J = 7.2$  Hz, 3H);  $^{13}\text{C NMR}$  (100 MHz,  $\text{CDCl}_3$ )  $\delta$  166.2, 148.8, 148.6, 138.0, 128.6, 128.5, 126.6, 119.1, 118.9, 62.0, 41.1, 32.8, 30.3, 20.5. FT-IR:  $\nu$  ( $\text{cm}^{-1}$ ) 3300, 3061, 2959, 2931, 2866, 2360, 2342, 1718. HRMS [ESI] calcd for  $\text{C}_{16}\text{H}_{20}\text{NO}$   $[\text{M}+\text{H}]^+$  242.1539, found 242.1537.

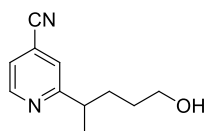

**3m:** yellow oil.  $^1\text{H NMR}$  (400 MHz,  $\text{CDCl}_3$ )  $\delta$  8.69 (d,  $J = 5.2$  Hz, 1H), 7.38-7.36 (m, 1H), 7.34 (dd,  $J = 4.8, 1.2$  Hz, 1H), 3.60 (t,  $J = 6.4$  Hz, 2H), 3.03-2.93 (m, 1H), 1.96 (br, 1H), 1.86-1.76 (m, 1H), 1.73-1.64 (m, 1H), 1.60-1.48 (m, 1H), 1.46-1.35 (m, 1H), 1.30 (d,  $J = 7.2$  Hz, 3H);  $^{13}\text{C NMR}$  (100 MHz,  $\text{CDCl}_3$ )  $\delta$  167.9, 150.1, 123.4, 122.6, 120.7, 116.7, 62.6, 41.6, 32.9, 30.5, 20.6. FT-IR:  $\nu$  ( $\text{cm}^{-1}$ ) 3357, 2934, 2871, 2238, 1595, 1550, 1459, 1398, 1291. HRMS [ESI] calcd for  $\text{C}_{11}\text{H}_{15}\text{N}_2\text{O}$   $[\text{M}+\text{H}]^+$  191.1179, found 191.1178.

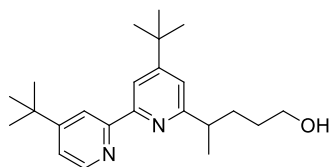

**3n:** yellow oil.  $^1\text{H NMR}$  (400 MHz,  $\text{CDCl}_3$ )  $\delta$  8.57 (d,  $J = 5.2$  Hz, 1H), 8.45 (d,  $J = 1.2$  Hz, 1H), 8.19 (d,  $J = 1.6$  Hz, 1H), 7.28 (d,  $J = 2.0$  Hz, 1H), 7.13 (d,  $J = 1.6$  Hz, 1H), 3.68-3.57 (m, 3H), 3.07-2.96 (m, 1H), 1.98-1.87 (m, 1H), 1.78-1.68 (m, 1H), 1.68-1.56 (m, 1H), 1.55-1.47 (m, 1H), 1.37 (m, 21H);  $^{13}\text{C NMR}$  (100 MHz,  $\text{CDCl}_3$ )  $\delta$  165.2, 161.3, 160.7, 156.9, 155.5, 148.9, 120.5, 118.5, 118.4, 115.8, 63.0, 41.6, 35.0, 34.9, 33.5, 30.7, 30.6, 21.2. FT-IR:  $\nu$  ( $\text{cm}^{-1}$ ) 2963, 2934, 2869, 2360, 2342, 1589, 1546, 1478. HRMS [ESI] calcd for  $\text{C}_{23}\text{H}_{35}\text{N}_2\text{O}$   $[\text{M}+\text{H}]^+$  355.2744, found 355.2739.

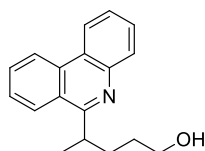

**3o:** yellow oil.  $^1\text{H NMR}$  (400 MHz,  $\text{CDCl}_3$ )  $\delta$  8.64 (d,  $J = 8.0$  Hz, 1H), 8.53 (d,  $J = 8.0$  Hz, 1H), 8.31 (d,  $J = 8.0$  Hz, 1H), 8.13 (d,  $J = 8.0$  Hz, 1H), 7.85-7.78 (m, 1H), 7.74-7.65 (m, 2H), 7.64-7.57 (m, 1H), 3.92-3.81 (m, 1H), 3.66-3.48 (m, 2H), 2.55 (br, 1H), 2.43-2.32 (m, 1H), 1.92-1.80 (m, 1H), 1.80-1.67 (m, 1H), 1.62-1.51 (m, 1H), 1.46 (d,  $J = 6.4$  Hz, 3H);  $^{13}\text{C NMR}$  (100 MHz,  $\text{CDCl}_3$ )  $\delta$  164.6, 143.0, 132.6, 129.7, 129.1, 128.1, 126.8, 125.9, 125.2, 124.6, 123.0, 122.2, 121.4, 62.1, 36.2, 30.6, 30.5, 20.8. FT-IR:  $\nu$  ( $\text{cm}^{-1}$ ) 3073, 2930, 2868, 1611, 1581, 1526, 1487, 1456. HRMS [ESI] calcd for  $\text{C}_{18}\text{H}_{20}\text{NO}$   $[\text{M}+\text{H}]^+$  266.1539, found 266.1545.

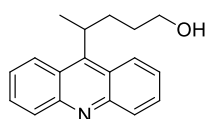

**3p:** yellow solid, m.p. 156-157 °C.  $^1\text{H NMR}$  (400 MHz,  $\text{CDCl}_3$ )  $\delta$  8.53-8.31 (m, 2H), 8.24 (d,  $J = 8.4$  Hz, 2H), 7.77-7.67 (m, 2H), 7.57-7.44 (m, 2H), 4.41-4.27 (m, 1H), 3.57 (t,  $J = 6.4$  Hz, 2H), 2.37-2.18 (m, 2H), 1.73 (t,  $J = 7.2$  Hz, 3H), 1.70-1.58 (m, 1H), 1.39-1.26 (m, 1H);  $^{13}\text{C NMR}$  (100 MHz,  $\text{CDCl}_3$ )  $\delta$  150.8, 148.2, 147.9, 130.0, 129.7, 129.2, 125.6, 125.4, 125.2, 124.9, 124.1, 124.0, 123.2, 62.0, 33.6, 33.1, 31.5, 20.8. FT-IR:  $\nu$  ( $\text{cm}^{-1}$ ) 3213, 3063, 3050, 2961, 2931, 2860, 2830, 1720. HRMS [ESI] calcd for  $\text{C}_{18}\text{H}_{20}\text{NO}$   $[\text{M}+\text{H}]^+$  266.1539, found 266.1541.

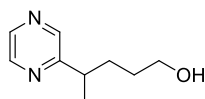

**3q:** yellow oil.  $^1\text{H NMR}$  (400 MHz,  $\text{CDCl}_3$ )  $\delta$  8.48 (dd,  $J = 2.4, 1.6$  Hz, 1H), 8.44 (d,  $J = 1.2$  Hz, 1H), 8.38 (d,  $J = 2.4$  Hz, 1H), 3.60 (t,  $J = 6.4$  Hz, 2H),

3.00-2.90 (m, 1H), 1.91 (br, 1H), 1.87-1.78 (m, 1H), 1.76-1.66 (m, 1H), 1.61-1.50 (m, 1H), 1.47-1.37 (m, 1H), 1.31 (d,  $J = 6.8$  Hz, 3H);  $^{13}\text{C}$  NMR (100 MHz,  $\text{CDCl}_3$ )  $\delta$  161.5, 144.0, 143.9, 142.3, 62.6, 39.2, 32.7, 30.6, 20.6. FT-IR:  $\nu$  ( $\text{cm}^{-1}$ ) 3356, 3055, 2961, 2932, 2870, 1722, 1671, 1577. HRMS [ESI] calcd for  $\text{C}_9\text{H}_{15}\text{N}_2\text{O}$   $[\text{M}+\text{H}]^+$  167.1179, found 167.1178.

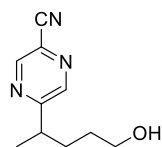

**3r:** yellow oil.  $^1\text{H}$  NMR (400 MHz,  $\text{CDCl}_3$ )  $\delta$  8.81 (d,  $J = 1.2$  Hz, 1H), 8.55 (d,  $J = 1.6$  Hz, 1H), 3.60 (t,  $J = 6.4$  Hz, 2H), 3.11-3.00 (m, 1H), 2.05 (br, 1H), 1.90-1.79 (m, 1H), 1.78-1.68 (m, 1H), 1.60-1.48 (m, 1H), 1.45-1.36 (m, 1H), 1.33 (t,  $J = 7.2$  Hz, 3H);  $^{13}\text{C}$  NMR (100 MHz,  $\text{CDCl}_3$ )  $\delta$  164.8, 147.0, 144.2, 127.6, 115.2, 61.9, 39.2, 32.1, 29.9, 19.7. FT-IR:  $\nu$  ( $\text{cm}^{-1}$ ) 3387, 2933, 2873, 2360, 2237, 1718, 1567, 1567. HRMS [ESI] calcd for  $\text{C}_{10}\text{H}_{14}\text{N}_3\text{O}$   $[\text{M}+\text{H}]^+$  192.1131, found 192.1134.

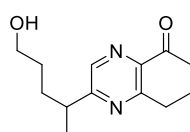

**3s:** yellow oil.  $^1\text{H}$  NMR (400 MHz,  $\text{CDCl}_3$ )  $\delta$  8.28 (s, 1H), 3.64-3.56 (m, 2H), 3.11 (q,  $J = 7.6$  Hz, 2H), 3.04-2.94 (m, 1H), 2.66 (s, 3H), 2.10 (br, 1H), 1.90-1.80 (m, 1H), 1.76-1.66 (m, 1H), 1.61-1.49 (m, 1H), 1.47-1.37 (m, 1H), 1.31 (d,  $J = 6.8$  Hz, 3H), 1.24 (t,  $J = 7.2$  Hz, 3H);  $^{13}\text{C}$  NMR (100 MHz,  $\text{CDCl}_3$ )  $\delta$  200.9, 162.6, 157.5, 143.9, 138.7, 62.1, 38.9, 32.1, 30.0, 28.4, 27.6, 19.8, 12.7. FT-IR:  $\nu$  ( $\text{cm}^{-1}$ ) 2967, 2935, 2874, 2361, 2343, 1698, 1552, 1533. HRMS [ESI] calcd for  $\text{C}_{13}\text{H}_{20}\text{N}_2\text{O}_2\text{Na}$   $[\text{M}+\text{Na}]^+$  259.1417, found 259.1411.

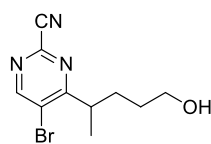

**3t:** yellow oil.  $^1\text{H}$  NMR (400 MHz,  $\text{CDCl}_3$ )  $\delta$  8.80 (s, 1H), 3.61 (t,  $J = 6.8$  Hz, 2H), 3.46-3.36 (m, 1H), 2.04-1.82 (m, 2H), 1.73-1.63 (m, 1H), 1.62-1.50 (m, 1H), 1.47-1.35 (m, 1H), 1.26 (d,  $J = 6.8$  Hz, 3H);  $^{13}\text{C}$  NMR (100 MHz,  $\text{CDCl}_3$ )  $\delta$  174.2, 159.0, 142.6, 124.0, 114.9, 62.0, 38.7, 30.8, 29.8, 18.5. FT-IR:  $\nu$  ( $\text{cm}^{-1}$ ) 3356, 2930, 2861, 2360, 2342, 1722, 1547, 1512. HRMS [ESI] calcd for  $\text{C}_{10}\text{H}_{12}\text{BrN}_3\text{ONa}$   $[\text{M}+\text{Na}]^+$  292.0056, found 292.0056.

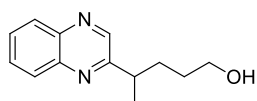

**3u:** yellow oil.  $^1\text{H}$  NMR (400 MHz,  $\text{CDCl}_3$ )  $\delta$  8.76 (s, 1H), 8.09-8.03 (m, 2H), 7.77-7.68 (m, 2H), 3.68-3.58 (m, 2H), 3.24-3.14 (m, 1H), 2.18 (br, 1H), 2.05-1.95 (m, 1H), 1.88-1.78 (m, 1H), 1.70-1.58 (m, 1H), 1.54-1.46 (m, 1H), 1.43 (d,  $J = 6.8$  Hz, 3H);  $^{13}\text{C}$  NMR (100 MHz,  $\text{CDCl}_3$ )  $\delta$  161.0, 145.0, 141.9, 141.4, 130.0, 129.1, 129.1, 128.9, 62.6, 40.1, 32.5, 30.7, 20.5. FT-IR:  $\nu$  ( $\text{cm}^{-1}$ ) 3364, 2933, 2870, 1717, 1559, 1493, 1456, 1369, 1276. HRMS [ESI] calcd for  $\text{C}_{13}\text{H}_{17}\text{N}_2\text{O}$   $[\text{M}+\text{H}]^+$  217.1335, found 217.1330.

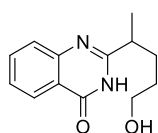

**3v:** white solid, m.p. 116-117  $^\circ\text{C}$ .  $^1\text{H}$  NMR (400 MHz,  $\text{CDCl}_3$ )  $\delta$  11.9 (br, 1H), 8.28 (d,  $J = 8.0$  Hz, 1H), 7.79-7.69 (m, 2H), 7.46 (dd,  $J = 7.2, 7.2$  Hz, 1H), 3.71 (t,  $J = 6.0$  Hz, 2H), 3.02-2.94 (m, 1H), 2.13-2.02 (m, 1H), 1.82-1.68 (m, 2H), 1.68-1.58 (m, 1H), 1.43 (d,  $J = 6.8$  Hz, 3H);  $^{13}\text{C}$  NMR (100 MHz,  $\text{CDCl}_3$ )  $\delta$  163.9, 159.8, 148.8, 134.4, 126.8, 126.1, 125.8, 120.1, 61.5, 39.0, 30.9, 29.5, 17.9. FT-IR:  $\nu$  ( $\text{cm}^{-1}$ ) 3172, 3126, 3034, 2972, 2924, 2870, 2360, 1677. HRMS [ESI] calcd for  $\text{C}_{13}\text{H}_{17}\text{N}_2\text{O}_2$   $[\text{M}+\text{H}]^+$  233.1285, found 233.1284.

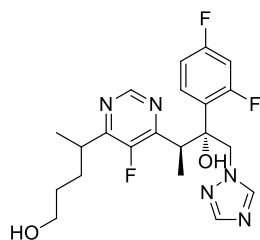

**3w** (*d.r.* = 1.2:1): yellow oil.  $^1\text{H}$  NMR (400 MHz,  $\text{CDCl}_3$ )  $\delta$  8.81 (dd,  $J$  = 4.0, 1.6 Hz, 1H, two isomers), 8.03 (d,  $J$  = 7.2 Hz, 1H, two isomers), 7.66-7.57 (m, 1H, two isomers), 7.54 (d,  $J$  = 8.8 Hz, 1H, two isomers), 6.87-6.79 (m, 2H, two isomers), 4.70 (m, 1H, two isomers), 4.32 (m, 1H, two isomers), 4.11 (q,  $J$  = 7.2 Hz, 1H, two isomers), 3.65 (d,  $J$  = 6.8 Hz, 1H, two isomers), 3.62 (d,  $J$  = 6.8 Hz, 1H, two isomers), 3.37-3.26 (m, 1H, two isomers), 2.14 (br, 2H, two isomers), 1.96-1.85 (m, 1H, two isomers), 1.79-1.67 (m, 1H, two isomers), 1.66-1.55 (m, 1H, two isomers), 1.52-1.38 (m, 1H, two isomers), 1.36-1.29 (m, 3H, two isomers), 1.07 (d,  $J$  = 7.2 Hz, 3H, two isomers);  $^{13}\text{C}$  NMR (100 MHz,  $\text{CDCl}_3$ )  $\delta$  163.5 (d,  $J_{\text{C-F}}$  = 12.3 Hz, one isomer), 162.5 & 162.4 (two isomers), 161.0 (d,  $J_{\text{C-F}}$  = 12.2 Hz, one isomer), 159.3 (d,  $J_{\text{C-F}}$  = 12.1 Hz, one isomer), 157.5 (d,  $J_{\text{C-F}}$  = 6.6 Hz, one isomer) & 157.4 (d,  $J_{\text{C-F}}$  = 6.6 Hz, one isomer), 156.8 (d,  $J_{\text{C-F}}$  = 11.7 Hz, one isomer), 154.4 (d,  $J_{\text{C-F}}$  = 5.3 Hz, one isomer), 152.3 (d,  $J_{\text{C-F}}$  = 2.8 Hz, one isomer) & 152.3 (d,  $J_{\text{C-F}}$  = 2.9 Hz, one isomer), 151.8 (d,  $J_{\text{C-F}}$  = 5.2 Hz, one isomer), 150.0 & 149.8 (two isomers), 143.4 (two isomers), 130.1 (d,  $J_{\text{C-F}}$  = 5.9 Hz, one isomer) & 130.1 (d,  $J_{\text{C-F}}$  = 5.9 Hz, one isomer), 123.2 (dd,  $J_{\text{C-F}}$  = 8.5, 3.8 Hz, one isomer) & 123.1 (dd,  $J_{\text{C-F}}$  = 8.2, 3.8 Hz, one isomer), 111.2 (d,  $J_{\text{C-F}}$  = 2.6 Hz, one isomer) & 110.9 (d,  $J_{\text{C-F}}$  = 3.2 Hz, one isomer), 103.7 (d,  $J_{\text{C-F}}$  = 27.2 Hz, one isomer) & 103.5 (d,  $J_{\text{C-F}}$  = 27.2 Hz, one isomer), 76.9 (two isomers), 61.7 & 61.7 (two isomers), 57.1 & 57.0 (two isomers), 35.9 (d,  $J_{\text{C-F}}$  = 4.3 Hz, one isomer), 35.9 (d,  $J_{\text{C-F}}$  = 4.3 Hz, one isomer), 33.9 & 33.7 (two isomers), 30.9 & 30.7 (two isomers), 30.0 & 29.9 (two isomers), 18.6 & 18.5 (two isomers), 15.8 & 15.7 (two isomers);  $^{19}\text{F}$  NMR (376 MHz,  $\text{CDCl}_3$ )  $\delta$  -109.00--109.02 (m, two isomers), -110.3--110.5 (m, two isomers), -139.09 & -139.22 (two isomers). FT-IR:  $\nu$  ( $\text{cm}^{-1}$ ) 3062, 2949, 2868, 1601, 1558, 1508, 1474, 1447. HRMS [ESI] calcd for  $\text{C}_{21}\text{H}_{24}\text{F}_3\text{N}_5\text{O}_2\text{Na}$  [ $\text{M}+\text{Na}$ ] $^+$  458.1770, found 458.1773.

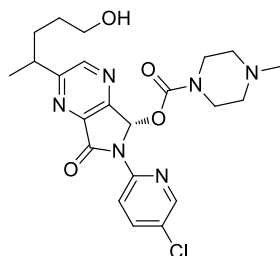

**3x** (*d.r.* = 1:1): yellow oil.  $^1\text{H}$  NMR (400 MHz,  $\text{CDCl}_3$ )  $\delta$  8.71 (s, 1H, two isomers), 8.46 (d,  $J$  = 8.8 Hz, 1H, two isomers), 8.36 (d,  $J$  = 2.4 Hz, 1H, two isomers), 7.92 (s, 1H, two isomers), 7.76 (dd,  $J$  = 8.8, 2.4 Hz, 1H, two isomers), 3.74-3.52 (m, 4H, two isomers), 3.38-3.24 (m, 2H, two isomers), 3.21-3.12 (m, 1H, two isomers), 2.61-2.20 (m, 7H, two isomers), 2.17-2.02 (m, 1H, two isomers), 2.00-1.86 (m, 1H, two isomers), 1.83-1.71 (m, 1H, two isomers), 1.64-1.53 (m, 1H, two isomers), 1.49-1.36 (m, 4H, two isomers);  $^{13}\text{C}$  NMR (100 MHz,  $\text{CDCl}_3$ )  $\delta$  166.5 & 166.5 (two isomers), 162.9 (two isomers), 154.4 (two isomers), 153.0 & 152.9 (two isomers), 147.5 & 147.5 (two isomers), 146.6 & 146.4 (two isomers), 146.2 (two isomers), 140.8 (two isomers), 137.6 (two isomers), 127.6 (two isomers), 115.6 (two isomers), 78.7 & 78.7 (two isomers), 61.9 & 61.8 (two isomers), 53.9 & 53.8 (two isomers), 45.3 & 45.2 (two isomers), 43.3 & 43.1 (two isomers), 39.5 (two isomers), 32.3 & 32.0 (two isomers), 30.0 (two isomers), 20.2 & 19.9 (two isomers). FT-IR:  $\nu$  ( $\text{cm}^{-1}$ ) 3032, 2948, 2878, 1601, 1561, 1508, 1424, 1358. HRMS [ESI] calcd for  $\text{C}_{22}\text{H}_{28}\text{ClN}_6\text{O}_4$  [ $\text{M}+\text{H}$ ] $^+$  475.1855, found 475.1859.

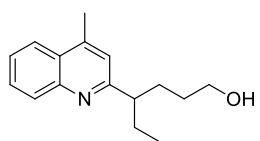

**3y**: yellow oil.  $^1\text{H}$  NMR (400 MHz,  $\text{CDCl}_3$ )  $\delta$  8.05-8.01 (m, 1H), 7.90 (dd,  $J$  = 8.0, 0.8 Hz, 1H), 7.61 (ddd,  $J$  = 8.4, 6.8, 1.2 Hz, 1H), 7.46 (ddd,  $J$  = 8.4, 6.8, 0.8 Hz, 1H), 7.11-7.07 (m, 1H), 3.65-3.51 (m, 3H), 2.88-2.79 (m, 1H), 2.63 (d,  $J$  = 0.8 Hz, 3H), 1.85-1.70 (m, 4H), 1.58-1.49 (m, 1H),

1.44-1.34 (m, 1H), 0.79 (t,  $J = 7.2$  Hz, 3H);  $^{13}\text{C}$  NMR (100 MHz,  $\text{CDCl}_3$ )  $\delta$  164.9, 146.8, 144.1, 128.7, 128.6, 126.6, 125.1, 123.1, 120.2, 61.9, 49.3, 31.0, 30.2, 28.1, 18.4, 11.7. FT-IR:  $\nu$  ( $\text{cm}^{-1}$ ) 2959, 2932, 2872, 2360, 2341, 1737, 1603, 1509. HRMS [ESI] calcd for  $\text{C}_{16}\text{H}_{22}\text{NO}$  [ $\text{M}+\text{H}$ ] $^+$  244.1696, found 244.1698.

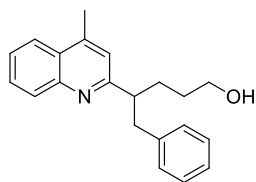

**3z**: yellow oil.  $^1\text{H}$  NMR (400 MHz,  $\text{CDCl}_3$ )  $\delta$  8.06 (d,  $J = 8.4$  Hz, 1H), 7.96-7.92 (m, 1H), 7.67 (ddd,  $J = 8.0, 6.8, 1.2$  Hz, 1H), 7.50 (ddd,  $J = 8.0, 7.2, 1.2$  Hz, 1H), 7.23-7.17 (m, 2H), 7.16-7.10 (m, 3H), 7.04 (s, 1H), 3.58-3.46 (m, 2H), 3.31-3.22 (m, 1H), 3.20-3.13 (m, 1H), 3.01-2.94 (m, 1H), 2.64 (s, 3H), 2.69-2.58 (m, 1H), 2.02-1.92 (m, 1H), 1.86-1.78 (m, 1H), 1.58-1.47 (m, 1H), 1.45-1.34 (m, 1H);  $^{13}\text{C}$  NMR (100 MHz,  $\text{CDCl}_3$ )  $\delta$  164.3, 147.5, 144.4, 140.3, 129.3, 129.2, 129.1, 128.2, 127.1, 125.9, 125.6, 123.6, 121.6, 62.5, 49.7, 42.2, 30.6, 30.5, 18.8. FT-IR:  $\nu$  ( $\text{cm}^{-1}$ ) 3084, 3061, 3027, 2934, 2858, 1602, 1561, 1509. HRMS [ESI] calcd for  $\text{C}_{21}\text{H}_{24}\text{NO}$  [ $\text{M}+\text{H}$ ] $^+$  306.1852, found 306.1856.

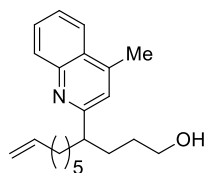

**3aa**: yellow oil.  $^1\text{H}$  NMR (400 MHz,  $\text{CDCl}_3$ )  $\delta$  8.04 (d,  $J = 8.4$  Hz, 1H), 7.92 (dd,  $J = 8.4, 0.8$  Hz, 1H), 7.63 (ddd,  $J = 8.4, 7.2, 1.6$  Hz, 1H), 7.48 (ddd,  $J = 8.0, 6.8, 1.2$  Hz, 1H), 7.10 (s, 1H), 5.79-5.67 (m, 1H), 4.95-4.83 (m, 2H), 3.62-3.52 (m, 2H), 3.42 (br, 1H), 2.98-2.88 (m, 1H), 2.66 (s, 3H), 1.99-1.90 (m, 2H), 1.86-1.78 (m, 2H), 1.78-1.66 (m, 2H), 1.60-1.49 (m, 1H), 1.45-1.34 (m, 1H), 1.32-1.20 (m, 6H);  $^{13}\text{C}$  NMR (100 MHz,  $\text{CDCl}_3$ )  $\delta$  165.0, 146.8, 144.1, 138.6, 128.7, 128.6, 126.6, 125.1, 123.1, 120.1, 113.7, 62.0, 47.6, 35.3, 33.2, 31.3, 30.2, 28.8, 28.2, 27.0, 18.4. FT-IR:  $\nu$  ( $\text{cm}^{-1}$ ) 2927, 2855, 2361, 2342, 1639, 1603, 1561, 1509. HRMS [ESI] calcd for  $\text{C}_{21}\text{H}_{30}\text{NO}$  [ $\text{M}+\text{H}$ ] $^+$  312.2322, found 312.2336.

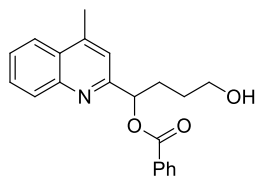

**3ab**: yellow solid, m.p. 110-111  $^\circ\text{C}$ .  $^1\text{H}$  NMR (400 MHz,  $\text{CDCl}_3$ )  $\delta$  8.14 (d,  $J = 7.2$  Hz, 2H), 8.08 (d,  $J = 8.8$  Hz, 1H), 7.94 (d,  $J = 8.4$  Hz, 1H), 7.68 (dd,  $J = 7.6, 7.6$  Hz, 1H), 7.60-7.50 (m, 2H), 7.46 (dd,  $J = 7.6, 7.6$  Hz, 2H), 7.36 (s, 1H), 6.23 (t,  $J = 6.8$  Hz, 1H), 3.74 (t,  $J = 6.0$  Hz, 2H), 3.15 (br, 1H), 2.67 (s, 3H), 2.31-2.24 (m, 2H), 1.88-1.71 (m, 2H);  $^{13}\text{C}$  NMR (100 MHz,  $\text{CDCl}_3$ )  $\delta$  165.5, 159.2, 146.6, 145.2, 132.7, 129.6, 129.3, 129.1, 129.0, 128.0, 127.1, 125.9, 123.2, 118.4, 76.8, 61.5, 31.0, 28.1, 18.6. FT-IR:  $\nu$  ( $\text{cm}^{-1}$ ) 3245, 2952, 2867, 1717, 1598, 1565, 1489, 1449, 1348. HRMS [ESI] calcd for  $\text{C}_{21}\text{H}_{22}\text{NO}_3$  [ $\text{M}+\text{H}$ ] $^+$  336.1594, found 336.1582.

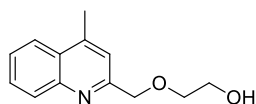

**3ac**: yellow oil.  $^1\text{H}$  NMR (400 MHz,  $\text{CDCl}_3$ )  $\delta$  8.05 (d,  $J = 8.4$  Hz, 1H), 7.95-7.92 (m, 1H), 7.66 (ddd,  $J = 8.0, 6.8, 1.2$  Hz, 1H), 7.54-7.49 (ddd,  $J = 8.0, 4.8, 1.2$  Hz, 1H), 7.26 (s, 1H), 4.81 (s, 2H), 4.39 (br, 1H), 3.84-3.80 (m, 2H), 3.78-3.74 (m, 2H), 2.65 (s, 3H);  $^{13}\text{C}$  NMR (100 MHz,  $\text{CDCl}_3$ )  $\delta$  158.4, 147.1, 145.3, 129.5, 129.2, 127.5, 126.2, 123.7, 119.9, 73.8, 73.1, 61.8, 18.8. FT-IR:  $\nu$  ( $\text{cm}^{-1}$ ) 3259, 2920, 2862, 1602, 1566, 1509, 1447, 1413, 1263. HRMS [ESI] calcd for  $\text{C}_{13}\text{H}_{16}\text{NO}_2$  [ $\text{M}+\text{H}$ ] $^+$  218.1176, found 218.1178.

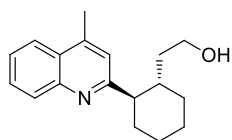

**3ad** (*d.r.* > 19:1): yellow oil.  $^1\text{H}$  NMR (400 MHz,  $\text{CDCl}_3$ )  $\delta$  8.00 (d,  $J = 8.4$  Hz, 1H), 7.90 (dd,  $J = 8.0, 0.8$  Hz, 1H), 7.63 (ddd,  $J = 8.4, 6.8, 1.2$  Hz, 1H), 7.47 (ddd,  $J = 8.4, 7.2, 1.2$  Hz, 1H), 7.12 (s, 1H), 3.53-3.45 (m, 3H), 2.70-2.62 (m, 4H), 2.12-2.02 (m, 1H), 1.98-1.88 (m, 2H), 1.84-1.78 (m, 2H), 1.56-1.44 (m, 1H), 1.44-1.35 (m, 3H), 1.34-1.12 (m, 2H);  $^{13}\text{C}$  NMR (100 MHz,  $\text{CDCl}_3$ )  $\delta$  165.1, 146.7, 144.3, 128.7, 128.6, 126.5, 125.1, 123.1, 120.9, 59.9, 52.1, 37.2, 37.0, 34.3, 32.3, 26.0, 25.8, 18.4. FT-IR:  $\nu$  ( $\text{cm}^{-1}$ ) 2923, 2852, 2360, 2341, 1737, 1603, 1561, 1508. HRMS [ESI] calcd for  $\text{C}_{18}\text{H}_{24}\text{NO}$  [ $\text{M}+\text{H}$ ] $^+$  270.1852, found 270.1854.

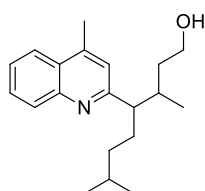

**3ae** (*d.r.* = 2:1): yellow oil.  $^1\text{H}$  NMR (400 MHz,  $\text{CDCl}_3$ )  $\delta$  8.05 (d,  $J = 8.4$  Hz, 3H, two isomers), 7.97-7.92 (m, 3H, two isomers), 7.69-7.62 (m, 3H, two isomers), 7.53-7.47 (m, 3H, two isomers), 7.11 (s, 3H, two isomers), 3.86-3.79 (m, 1H, one isomer), 3.77-3.71 (m, 1H, one isomer), 3.71-3.64 (m, 2H, one isomer), 3.61-3.54 (m, 2H, one isomer), 3.52-3.10 (br, 3H, two isomers), 3.08-3.02 (m, 1H, one isomer), 2.86-2.78 (m, 2H, one isomer), 2.70-2.66 (m, 9H, two isomers), 2.16-2.00 (m, 3H, two isomers), 1.96-1.64 (m, 8H, two isomers), 1.56-1.41 (m, 7H, two isomers), 1.40-1.30 (m, 3H, two isomers), 1.09-0.97 (m, 9H, two isomers), 0.84-0.77 (m, 21H, two isomers);  $^{13}\text{C}$  NMR (100 MHz,  $\text{CDCl}_3$ )  $\delta$  164.4 & 163.1 (two isomers), 146.4 & 146.2 (two isomers), 144.1 & 143.7 (two isomers), 128.7 & 128.6 (two isomers), 128.6 & 128.5 (two isomers), 126.5 & 126.4 (two isomers), 125.2 (two isomers), 123.1 & 123.1 (two isomers), 121.2 & 121.1 (two isomers), 61.0 & 59.9 (two isomers), 52.9 & 51.6 (two isomers), 37.3 & 36.9 (two isomers), 36.7 & 36.2 (two isomers), 35.7 & 34.1 (two isomers), 29.2 (two isomers), 28.5 & 27.7 (two isomers), 22.3 & 22.2 (two isomers), 21.9 & 21.8 (two isomers), 18.5 & 18.5 (two isomers), 17.0 & 16.6 (two isomers). FT-IR:  $\nu$  ( $\text{cm}^{-1}$ ) 2955, 2929, 2870, 1603, 1560, 1509, 1449, 1382. HRMS [ESI] calcd for  $\text{C}_{20}\text{H}_{29}\text{NONa}$  [ $\text{M}+\text{Na}$ ] $^+$  322.2141, found 322.2132.

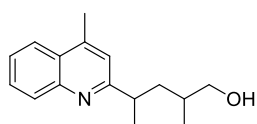

**3af** (*d.r.* = 1:1): yellow oil.  $^1\text{H}$  NMR (400 MHz,  $\text{CDCl}_3$ )  $\delta$  8.04 (d,  $J = 8.4$  Hz, 2H, two isomers), 7.94-7.89 (m, 2H, two isomers), 7.67-7.61 (m, 2H, two isomers), 7.51-7.45 (m, 2H, two isomers), 7.17-7.14 (m, 2H, two isomers), 4.00 (br, 2H, two isomers), 3.52-3.42 (m, 2H, two isomers), 3.41-3.38 (m, 2H, two isomers), 3.33-3.23 (m, 1H, one isomer), 3.23-3.15 (m, 1H, one isomer), 2.66 (d,  $J = 0.8$  Hz, 3H, one isomer), 2.65 (d,  $J = 0.8$  Hz, 3H, one isomer), 2.22-2.13 (m, 1H, one isomer), 1.78-1.71 (m, 2H, two isomers), 1.71-1.64 (m, 1H, one isomer), 1.57-1.48 (m, 1H, one isomer), 1.44-1.37 (m, 1H, one isomer), 1.34 (d,  $J = 3.6$  Hz, 3H, one isomer), 1.32 (d,  $J = 3.6$  Hz, 3H, one isomer), 0.96 (d,  $J = 6.8$  Hz, 3H, one isomer), 1.87 (d,  $J = 6.8$  Hz, 3H, one isomer);  $^{13}\text{C}$  NMR (100 MHz,  $\text{CDCl}_3$ )  $\delta$  166.5 & 166.1 (two isomers), 147.0 & 146.9 (two isomers), 145.1 & 145.0 (two isomers), 129.3 & 129.2 (two isomers), 129.0 & 129.0 (two isomers), 127.0 & 127.0 (two isomers), 125.7 (two isomers), 123.6 (two isomers), 120.8 & 120.1 (two isomers), 68.1 & 67.5 (two isomers), 41.1 & 40.1 (two isomers), 39.7 & 39.5 (two isomers), 34.3 & 33.6 (two isomers), 22.4 & 21.0 (two isomers), 18.9 & 18.9 (two isomers), 17.6 & 17.4 (two isomers). FT-IR:  $\nu$  ( $\text{cm}^{-1}$ ) 3063, 2959, 2925, 2870, 2360, 2342, 1732, 1509. HRMS [ESI] calcd for  $\text{C}_{16}\text{H}_{22}\text{NO}$  [ $\text{M}+\text{H}$ ] $^+$  244.1696, found 244.1698.

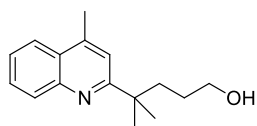

**3ag:** yellow oil.  $^1\text{H}$  NMR (400 MHz,  $\text{CDCl}_3$ )  $\delta$  8.05 (d,  $J = 8.4$  Hz, 1H), 7.92 (dd,  $J = 8.0, 0.8$  Hz, 1H), 7.64 (ddd,  $J = 8.0, 6.8, 1.2$  Hz, 1H), 7.48 (ddd,  $J = 8.0, 6.8, 1.2$  Hz, 1H), 7.31 (s, 1H), 3.53 (t,  $J = 6.0$  Hz, 2H), 3.31 (br, 1H), 2.67 (s, 3H), 1.98-1.92 (m, 2H), 1.51-1.45 (m, 2H), 1.42 (s, 6H);  $^{13}\text{C}$  NMR (100 MHz,  $\text{CDCl}_3$ )  $\delta$  167.3, 146.5, 143.6, 129.0, 128.5, 126.1, 125.1, 123.0, 119.0, 62.4, 40.2, 37.4, 27.9, 27.7, 18.5. FT-IR:  $\nu$  ( $\text{cm}^{-1}$ ) 3062, 2949, 2868, 1601, 1558, 1508, 1474, 1447. HRMS [ESI] calcd for  $\text{C}_{16}\text{H}_{22}\text{NO}$  [ $\text{M}+\text{H}$ ] $^+$  244.1696, found 244.1695.

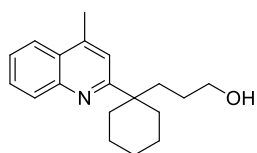

**3ah:** yellow oil.  $^1\text{H}$  NMR (400 MHz,  $\text{CDCl}_3$ )  $\delta$  8.00 (d,  $J = 8.4$  Hz, 1H), 7.91 (d,  $J = 8.0$  Hz, 1H), 7.64 (ddd,  $J = 8.0, 7.2, 1.2$  Hz, 1H), 7.48 (ddd,  $J = 8.0, 7.2, 1.2$  Hz, 1H), 7.13 (s, 1H), 3.56-3.45 (m, 2H), 2.71-2.61 (m, 1H), 2.65 (s, 3H), 2.12-2.02 (m, 1H), 1.99-1.89 (m, 2H), 1.85-1.78 (m, 2H), 1.67 (br, 1H), 1.57-1.48 (m, 1H), 1.53-1.48 (m, 4H), 1.33-1.27 (m, 1H), 1.26-1.12 (m, 2H);  $^{13}\text{C}$  NMR (100 MHz,  $\text{CDCl}_3$ )  $\delta$  165.1, 146.7, 144.3, 128.7, 128.6, 126.5, 125.1, 123.1, 120.9, 59.9, 52.1, 37.2, 37.0, 34.3, 32.9, 32.3, 26.1, 25.8, 18.4. FT-IR:  $\nu$  ( $\text{cm}^{-1}$ ) 3318, 2923, 2852, 2361, 2342, 2233, 1604, 1508. HRMS [ESI] calcd for  $\text{C}_{19}\text{H}_{25}\text{NONa}$  [ $\text{M}+\text{Na}$ ] $^+$  306.1828, found 306.1842.

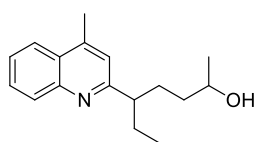

**3ai:** (*d.r.* = 1:1): yellow oil.  $^1\text{H}$  NMR (400 MHz,  $\text{CDCl}_3$ )  $\delta$  8.05 (d,  $J = 8.4$  Hz, 2H, two isomers), 7.96-7.90 (m, 2H, two isomers), 7.68-7.62 (m, 2H, two isomers), 7.52-7.46 (m, 2H, two isomers), 7.13-7.09 (m, 2H, two isomers), 3.83-3.74 (m, 1H, one isomer), 3.73-3.64 (m, 1H, one isomer), 2.89-2.81 (m, 2H, two isomers), 2.69-2.64 (m, 8H, two isomers), 1.96-1.73 (m, 8H, two isomers), 1.50-1.40 (m, 2H, two isomers), 1.36-1.18 (m, 2H, two isomers), 1.10 (d,  $J = 6.0$  Hz, 3H, one isomer), 1.09 (d,  $J = 6.0$  Hz, 3H, one isomer), 0.83 (t,  $J = 7.2$  Hz, 3H, one isomer), 0.82 (t,  $J = 7.2$  Hz, 3H, one isomer);  $^{13}\text{C}$  NMR (100 MHz,  $\text{CDCl}_3$ )  $\delta$  165.4 & 165.2 (two isomers), 147.4 & 147.3 (two isomers), 144.5 & 144.3 (two isomers), 129.4 & 129.3 (two isomers), 129.1 & 129.0 (two isomers), 127.0 (two isomers), 125.6 & 125.5 (two isomers), 123.6 (two isomers), 120.9 & 120.8 (two isomers), 68.0 & 67.7 (two isomers), 50.0 & 49.8 (two isomers), 37.2 & 37.0 (two isomers), 31.0 & 30.9 (two isomers), 28.8 & 28.8 (two isomers), 23.5 & 23.4 (two isomers), 18.9 (two isomers), 12.1 & 12.1 (two isomers). FT-IR:  $\nu$  ( $\text{cm}^{-1}$ ) 3340, 2962, 2929, 2873, 2361, 2232, 1684, 1509. HRMS [ESI] calcd for  $\text{C}_{17}\text{H}_{24}\text{NO}$  [ $\text{M}+\text{H}$ ] $^+$  258.1852, found 258.1856.

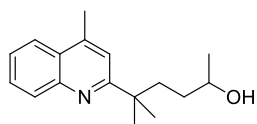

**3aj:** yellow oil.  $^1\text{H}$  NMR (400 MHz,  $\text{CDCl}_3$ )  $\delta$  8.06 (d,  $J = 8.4$  Hz, 1H), 7.95-7.91 (m, 1H), 7.65 (ddd,  $J = 8.4, 7.2, 1.2$  Hz, 1H), 7.52-7.47 (ddd,  $J = 8.0, 6.8, 0.8$  Hz, 1H), 7.33-7.30 (m, 1H), 3.78-3.69 (m, 1H), 3.58 (br, 1H), 2.68 (d,  $J = 0.8$  Hz, 3H), 2.11-2.02 (m, 1H), 2.01-1.92 (m, 1H), 1.50-1.44 (m, 1H), 1.41 (s, 3H), 1.40 (s, 3H), 1.38-1.30 (m, 1H), 1.12 (d,  $J = 6.0$  Hz, 3H);  $^{13}\text{C}$  NMR (100 MHz,  $\text{CDCl}_3$ )  $\delta$  167.2, 146.3, 143.8, 128.9, 128.6, 126.0, 125.2, 122.9, 119.2, 67.5, 40.3, 36.6, 34.1, 28.3, 28.0, 22.9, 18.5. FT-IR:  $\nu$  ( $\text{cm}^{-1}$ ) 3356, 3063, 2964, 2928, 2867, 2361, 2341, 1508. HRMS [ESI] calcd for  $\text{C}_{17}\text{H}_{24}\text{NO}$  [ $\text{M}+\text{H}$ ] $^+$  258.1852, found 258.1845.

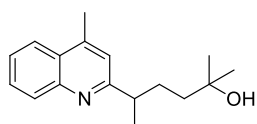

**3ak:** yellow oil.  $^1\text{H}$  NMR (400 MHz,  $\text{CDCl}_3$ )  $\delta$  8.07-8.03 (m, 1H), 7.93 (dd,  $J = 8.4, 0.8$  Hz, 1H), 7.65 (ddd,  $J = 8.0, 6.8, 1.2$  Hz, 1H), 7.48 (ddd,  $J = 8.4, 7.2, 1.6$  Hz, 1H), 7.14-7.13 (m, 1H), 3.10-3.00 (m, 1H), 2.67 (d,  $J$



= 0.8 Hz, 3H), 2.32 (br, 1H), 2.00-1.89 (m, 1H), 1.82-1.72 (m, 1H), 1.62-1.49 (m, 1H), 1.36 (d,  $J = 7.2$  Hz, 3H), 1.33-1.28 (m, 1H), 1.18 (s, 3H), 1.17 (s, 3H);  $^{13}\text{C}$  NMR (100 MHz,  $\text{CDCl}_3$ )  $\delta$  166.2, 147.3, 144.6, 129.4, 129.1, 127.0, 125.5, 123.6, 120.4, 70.7, 42.7, 41.4, 31.1, 29.4, 29.3, 21.2, 18.9. FT-IR:  $\nu$  ( $\text{cm}^{-1}$ ) 3368, 2966, 2870, 1670, 1604, 1561, 1449, 1344, 1296. HRMS [ESI] calcd for  $\text{C}_{17}\text{H}_{24}\text{NO}$   $[\text{M}+\text{H}]^+$  258.1852, found 258.1845.

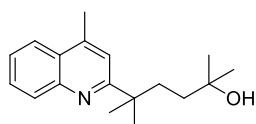

**3al**: yellow oil.  $^1\text{H}$  NMR (400 MHz,  $\text{CDCl}_3$ )  $\delta$  8.07 (d,  $J = 8.4$  Hz, 1H), 7.93 (dd,  $J = 8.4, 0.8$  Hz, 1H), 7.65 (ddd,  $J = 8.4, 6.8, 1.2$  Hz, 1H), 7.50 (ddd,  $J = 8.0, 6.8, 1.2$  Hz, 1H), 7.32 (s, 1H), 3.74 (br, 1H), 2.68 (s, 3H), 2.05-2.00 (m, 2H), 1.45-1.42 (m, 2H), 1.41 (s, 6H), 1.19 (s, 6H);  $^{13}\text{C}$  NMR (100 MHz,  $\text{CDCl}_3$ )  $\delta$  167.1, 146.4, 143.7, 128.9, 128.5, 126.0, 125.2, 122.9, 119.3, 70.1, 40.3, 38.1, 35.0, 28.9, 28.2, 18.5. FT-IR:  $\nu$  ( $\text{cm}^{-1}$ ) 3062, 2966, 2930, 2869, 2360, 2341, 2226, 1508. HRMS [ESI] calcd for  $\text{C}_{18}\text{H}_{26}\text{NO}$   $[\text{M}+\text{H}]^+$  272.2009, found 272.2011.

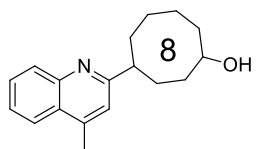

**3am** ( $dr = 1:1$ ): yellow oil.  $^1\text{H}$  NMR (400 MHz,  $\text{CDCl}_3$ )  $\delta$  8.03 (d,  $J = 8.4$  Hz, 2H, two isomers), 7.94 (dd,  $J = 8.4, 0.8$  Hz, 2H, two isomers), 7.66 (ddd,  $J = 8.0, 6.8, 1.2$  Hz, 2H, two isomers), 7.49 (ddd,  $J = 8.0, 6.8, 1.2$  Hz, 2H, two isomers), 7.13 (d,  $J = 0.4$  Hz, 1H, one isomer), 7.10 (d,  $J = 0.8$  Hz, 1H, one isomer), 4.06-3.96 (m, 2H, two isomers), 3.14-3.01 (m, 2H, two isomers), 2.67 (d,  $J = 0.8$  Hz, 6H, two isomers), 2.15-2.00 (m, 6H, two isomers), 1.98-1.53 (m, 20H, two isomers);  $^{13}\text{C}$  NMR (100 MHz,  $\text{CDCl}_3$ )  $\delta$  167.8 & 167.7 (two isomers), 144.6 & 144.5 (two isomers), 129.5 & 129.4 (two isomers), 129.0 & 129.0 (two isomers), 126.9 & 126.9 (two isomers), 125.4 (two isomers), 123.6 (two isomers), 120.7 (two isomers), 120.4 (two isomers), 72.3 & 71.4 (two isomers), 48.2 & 47.9 (two isomers), 34.8 & 34.5 (two isomers), 33.9 & 33.4 (two isomers), 31.9 & 31.6 (two isomers), 29.6 & 28.5 (two isomers), 26.7 & 26.6 (two isomers), 23.0 & 22.4 (two isomers), 18.9 & 18.8 (two isomers). FT-IR:  $\nu$  ( $\text{cm}^{-1}$ ) 3328, 2923, 2854, 2360, 2342, 2203, 1731, 1603. HRMS [ESI] calcd for  $\text{C}_{18}\text{H}_{24}\text{NO}$   $[\text{M}+\text{H}]^+$  270.1852, found 270.1850.

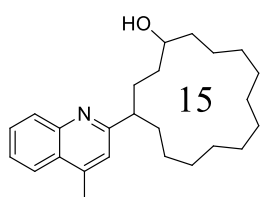

**3an** ( $dr = 1.8:1$ ): yellow oil.  $^1\text{H}$  NMR (400 MHz,  $\text{CDCl}_3$ )  $\delta$  8.10-8.04 (m, 2.8H, two isomers), 7.94 (d,  $J = 8.4$  Hz, 2.8H, two isomers), 7.69-7.62 (m, 2.8H, two isomers), 7.53-7.46 (m, 2.8H, two isomers), 7.15 (s, 1.8H, one isomer), 7.12 (s, 1H, one isomer), 3.94-3.86 (m, 1.8H, one isomer), 3.76-3.67 (m, 1H, one isomer), 3.12-2.98 (m, 2.8H, two isomers), 2.69-2.66 (m, 8.4H, two isomers), 1.98-1.86 (m, 2.8H, two isomers), 1.86-1.71 (m, 8.4H, two isomers), 1.68-1.55 (m, 8.4H, two isomers), 1.52-1.32 (m, 53.2H, two isomers);  $^{13}\text{C}$  NMR (100 MHz,  $\text{CDCl}_3$ )  $\delta$  165.5 (two isomers), 128.9 (two isomers), 128.7 (two isomers), 128.6 & 128.5 (two isomers), 126.5 (two isomers), 125.2 (two isomers), 125.0 (two isomers), 123.1 & 123.1 (two isomers), 120.3 & 120.1 (two isomers), 71.0 & 68.5 (two isomers), 46.4 & 44.2 (two isomers), 34.8 & 34.8 (two isomers), 33.6 & 33.4 (two isomers), 33.0 (two isomers), 32.4 (two isomers), 29.1 & 28.7 (two isomers), 26.7 & 26.6 (two isomers), 26.5 (two isomers), 26.4 & 26.3 (two isomers), 26.2 & 26.2 (two isomers), 26.2 & 26.1 (two isomers), 25.3 & 25.2 (two isomers), 23.2 & 22.4 (two isomers), 18.5 & 18.4 (two isomers). FT-IR:  $\nu$  ( $\text{cm}^{-1}$ ) 2927, 2855, 1603, 1561, 1509, 1413, 1346, 1215. HRMS [ESI] calcd for  $\text{C}_{25}\text{H}_{38}\text{NO}$   $[\text{M}+\text{H}]^+$  368.2948, found 368.2945.

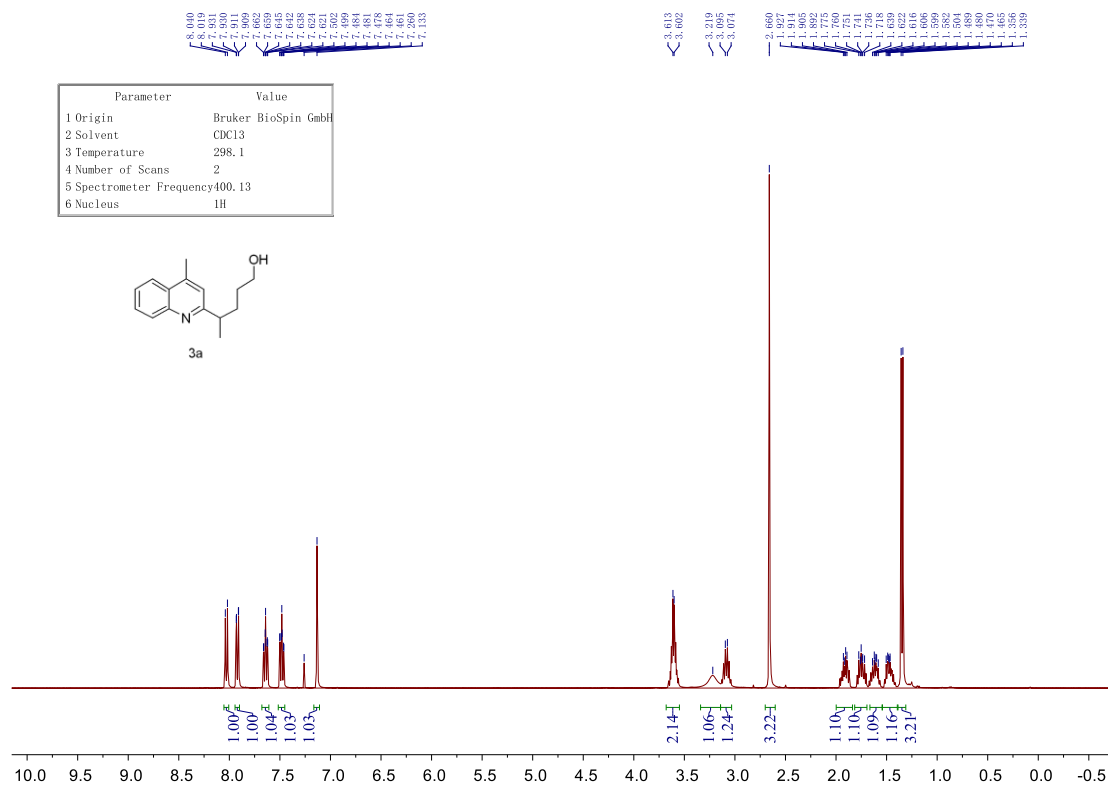

Supplementary Figure 2. <sup>1</sup>H NMR (400 MHz, CDCl<sub>3</sub>) spectra for compound 3a.

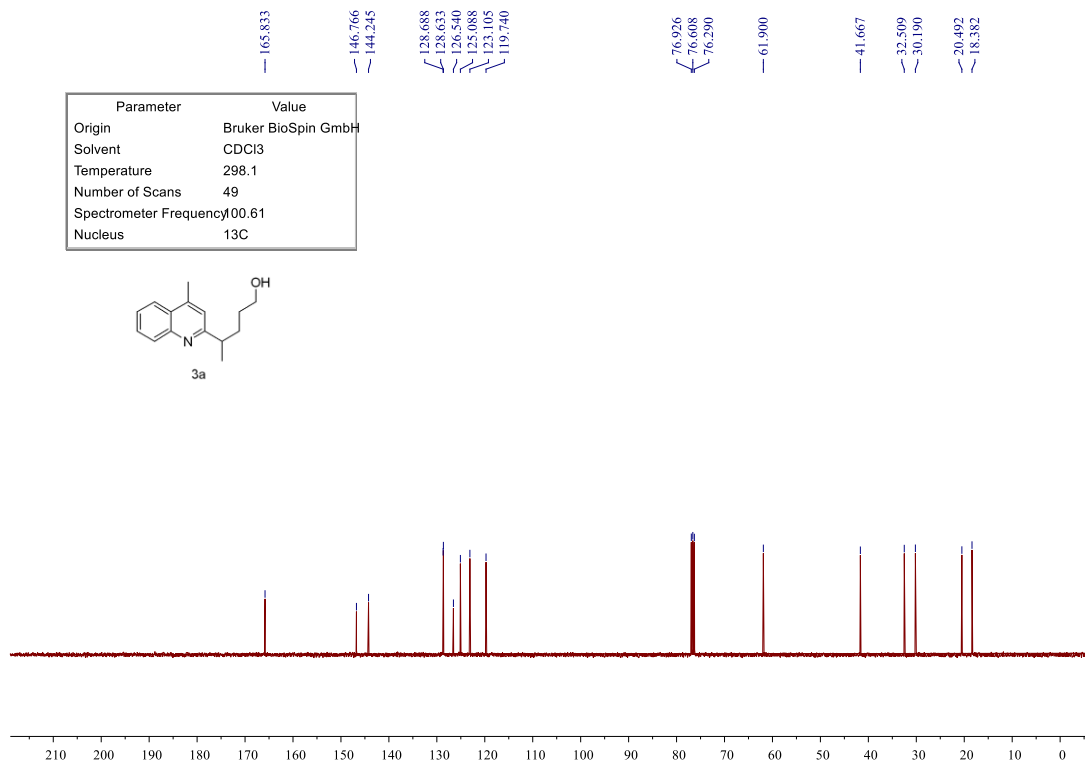

Supplementary Figure 3. <sup>13</sup>C NMR (100 MHz, CDCl<sub>3</sub>) spectra for compound 3a.

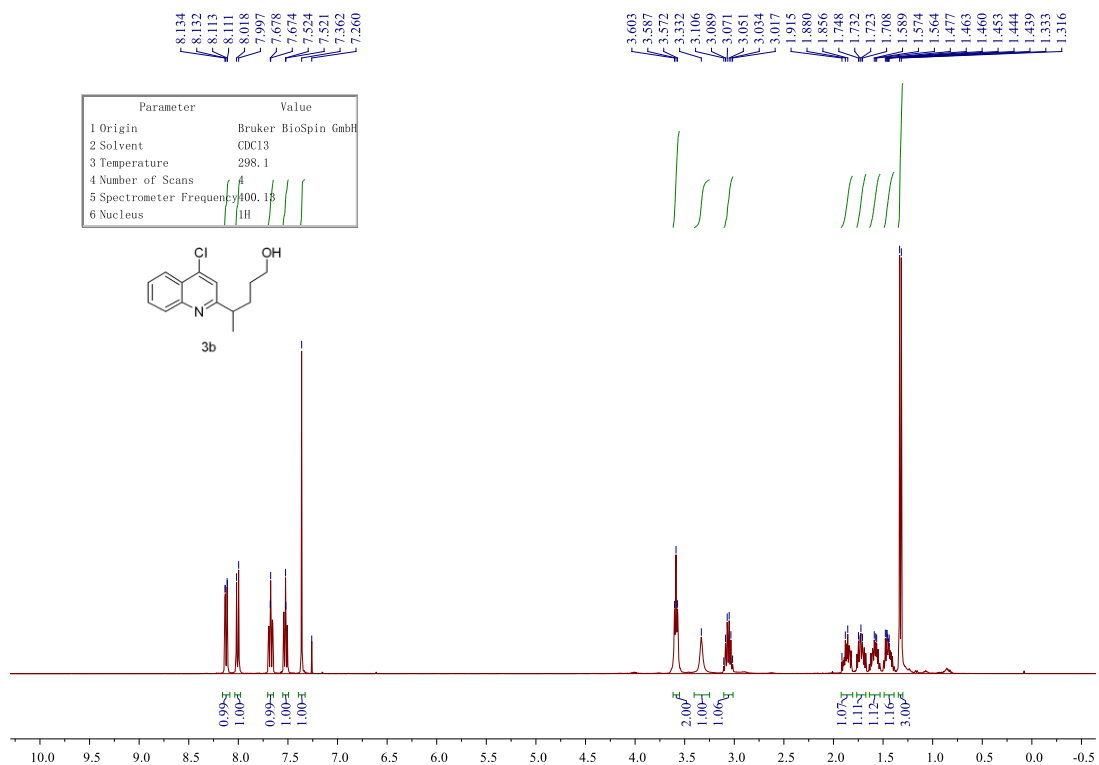

Supplementary Figure 4. <sup>1</sup>H NMR (400 MHz, CDCl<sub>3</sub>) spectra for compound 3b.

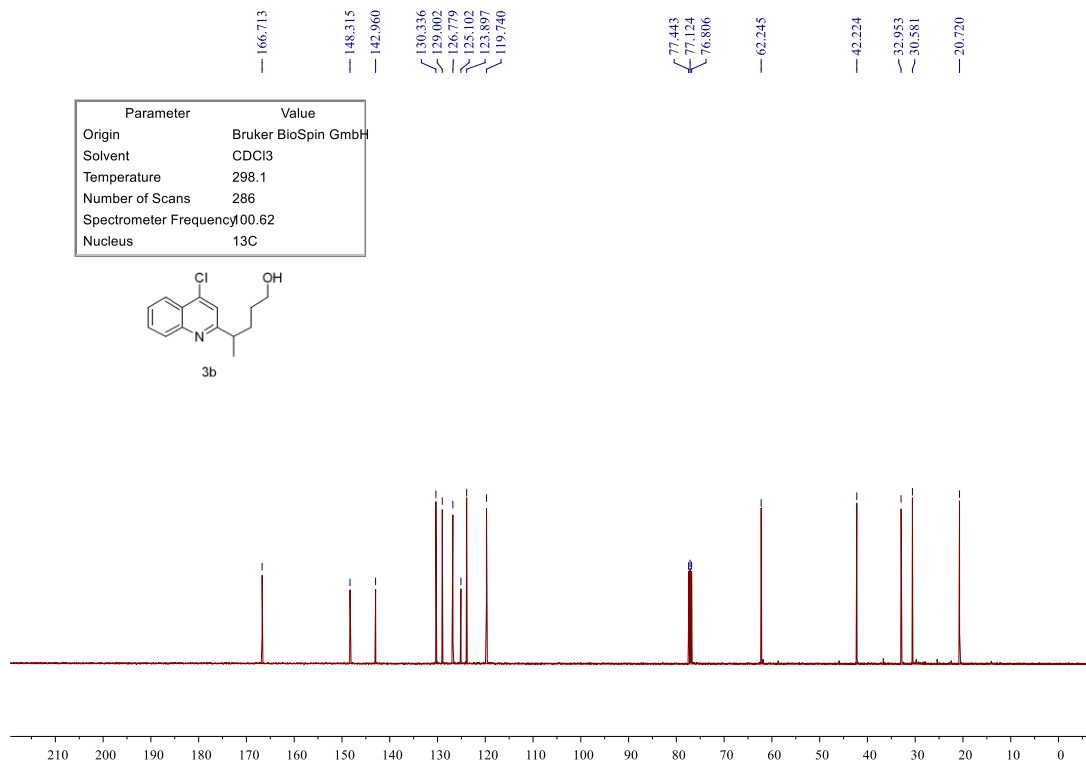

Supplementary Figure 5. <sup>13</sup>C NMR (100 MHz, CDCl<sub>3</sub>) spectra for compound 3b.

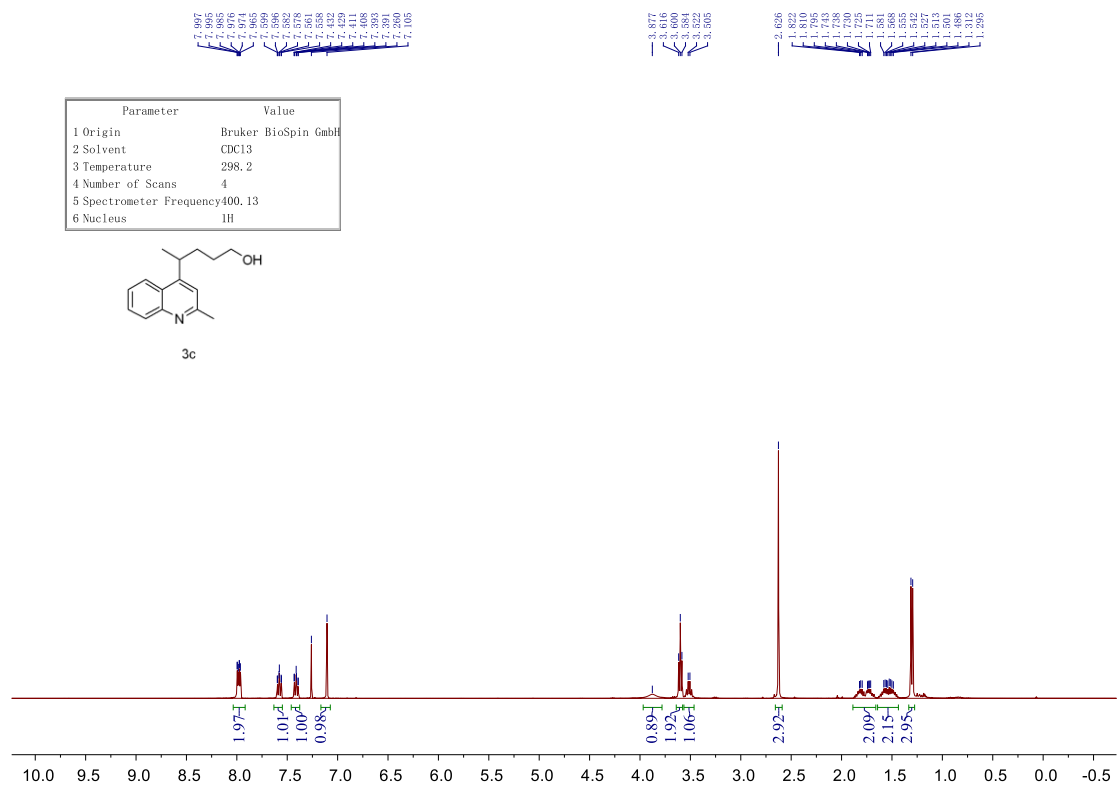

Supplementary Figure 6. <sup>1</sup>H NMR (400 MHz, CDCl<sub>3</sub>) spectra for compound 3c.

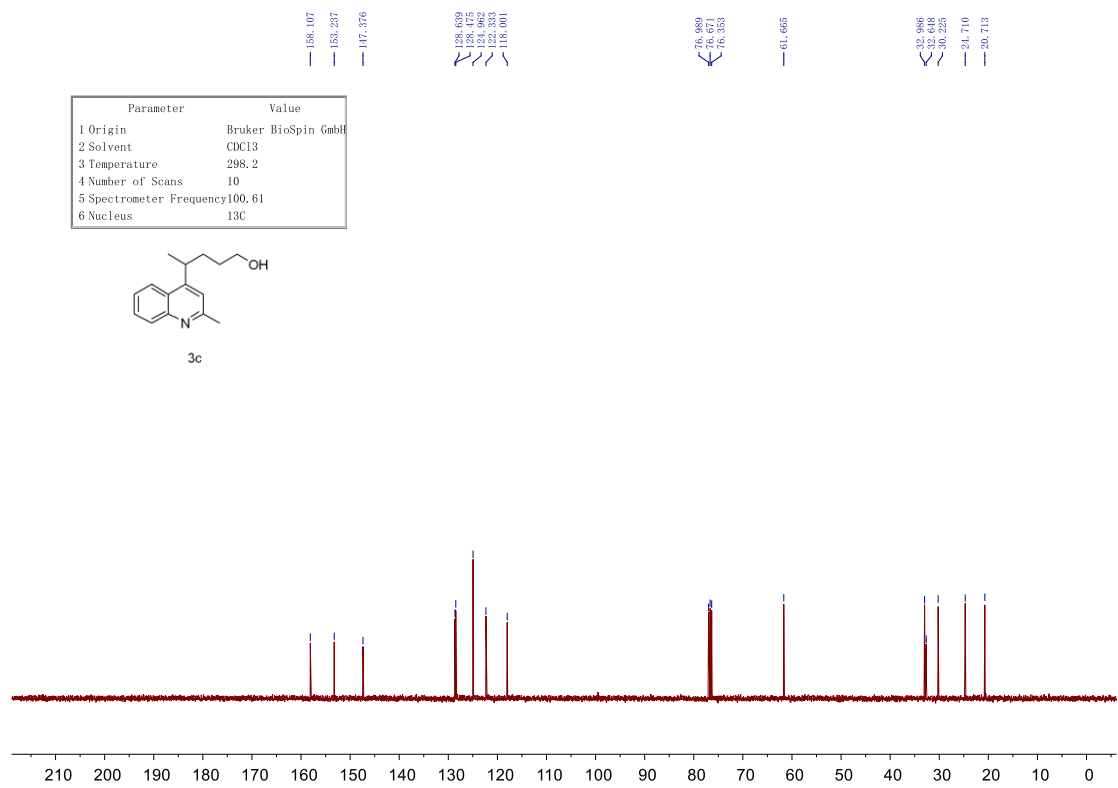

Supplementary Figure 7. <sup>13</sup>C NMR (100 MHz, CDCl<sub>3</sub>) spectra for compound 3c.

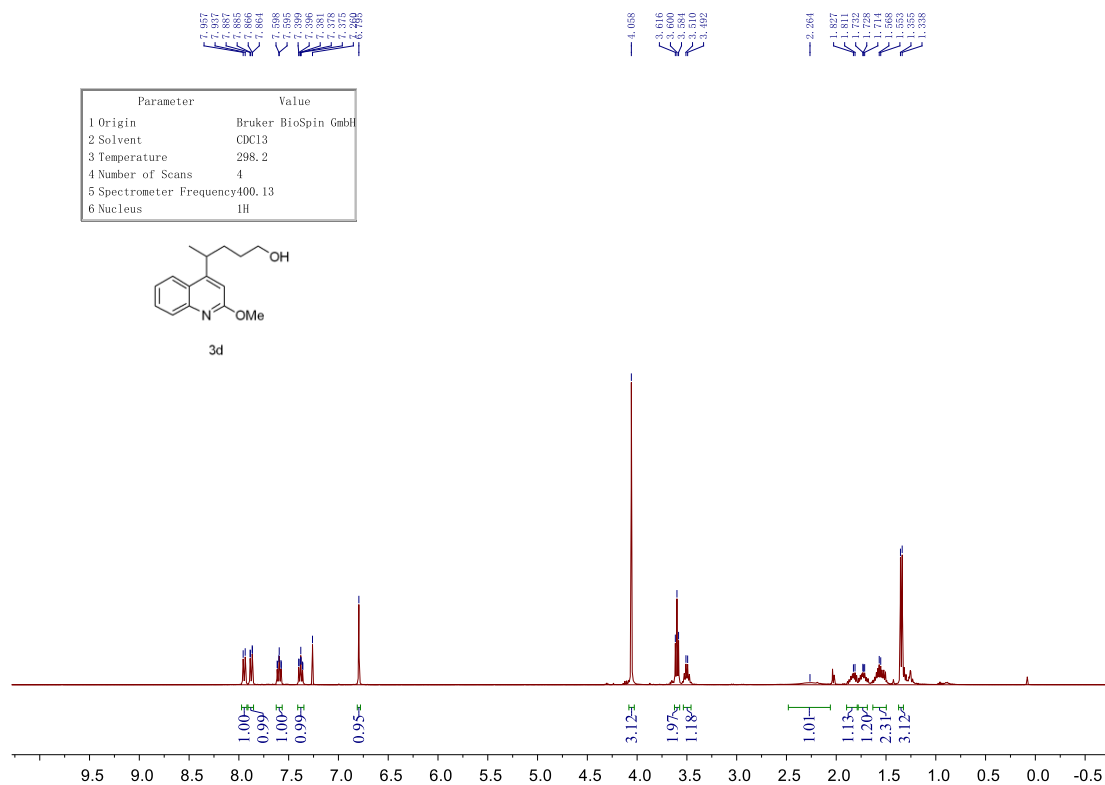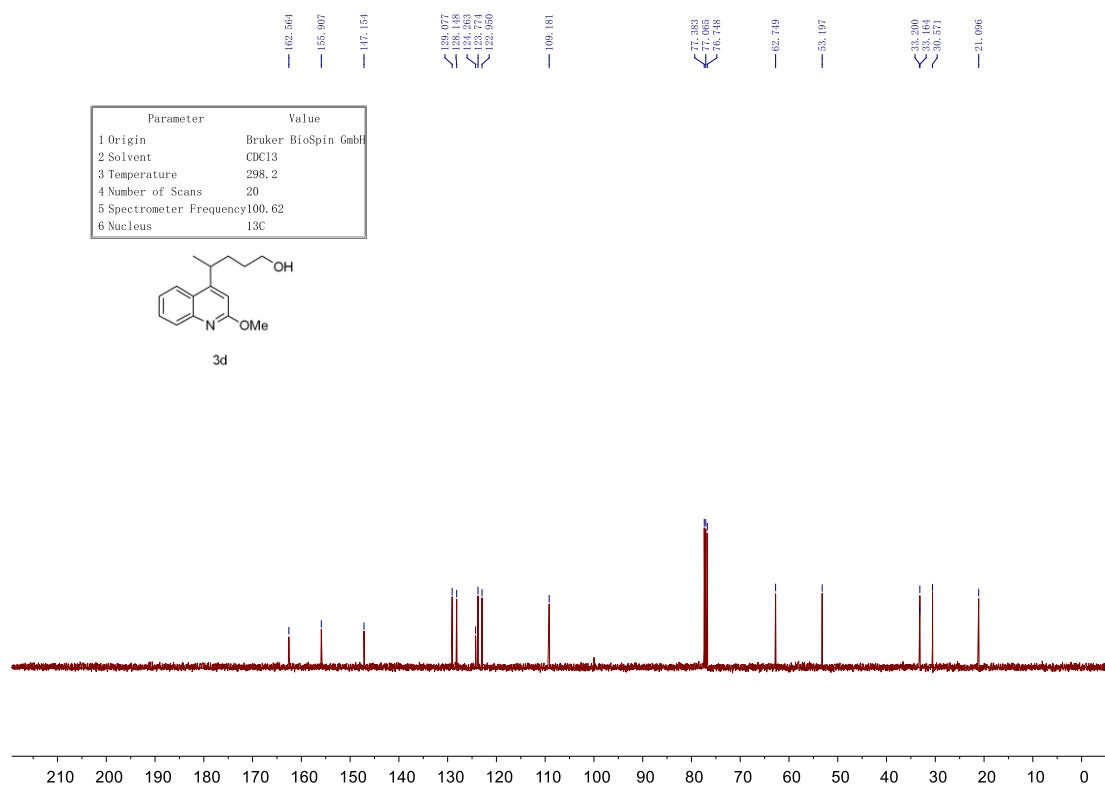

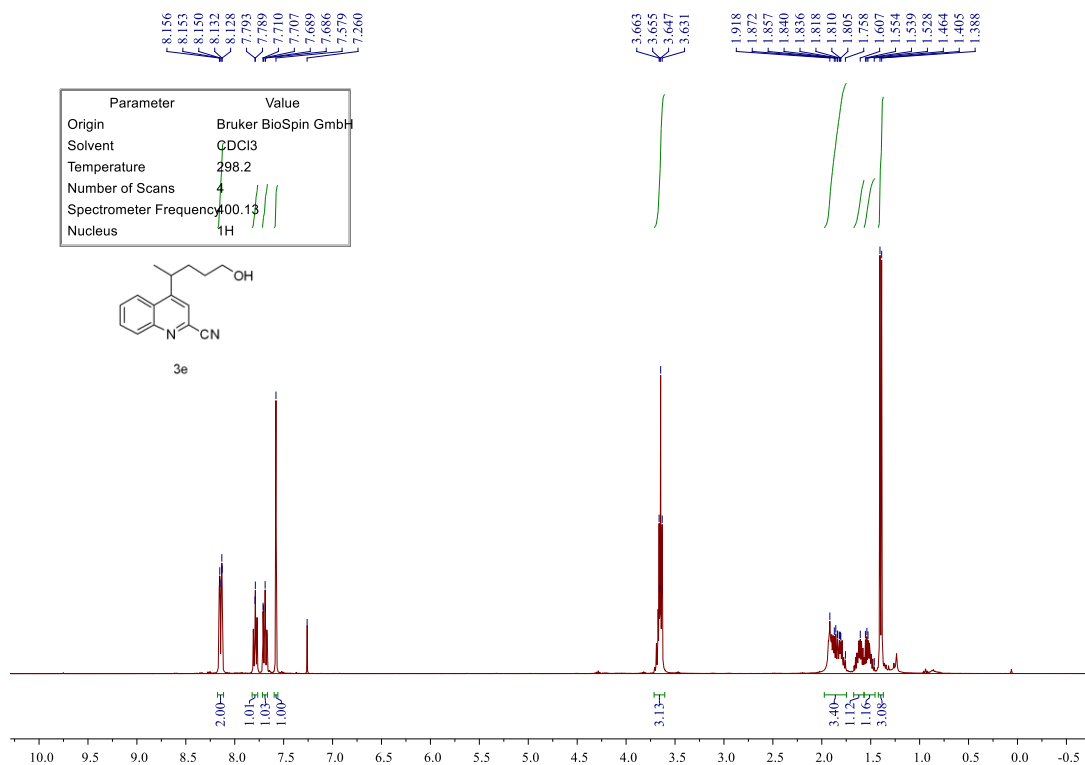

Supplementary Figure 10. <sup>1</sup>H NMR (400 MHz, CDCl<sub>3</sub>) spectra for compound 3e.

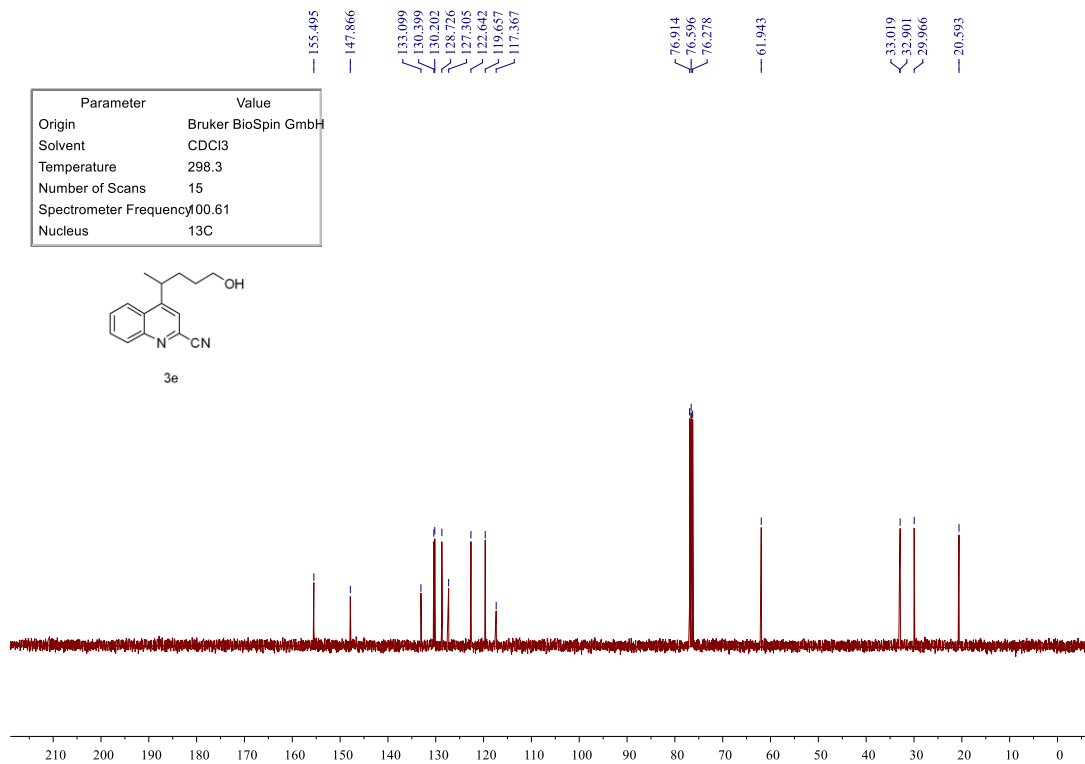

Supplementary Figure 11. <sup>13</sup>C NMR (100 MHz, CDCl<sub>3</sub>) spectra for compound 3e.

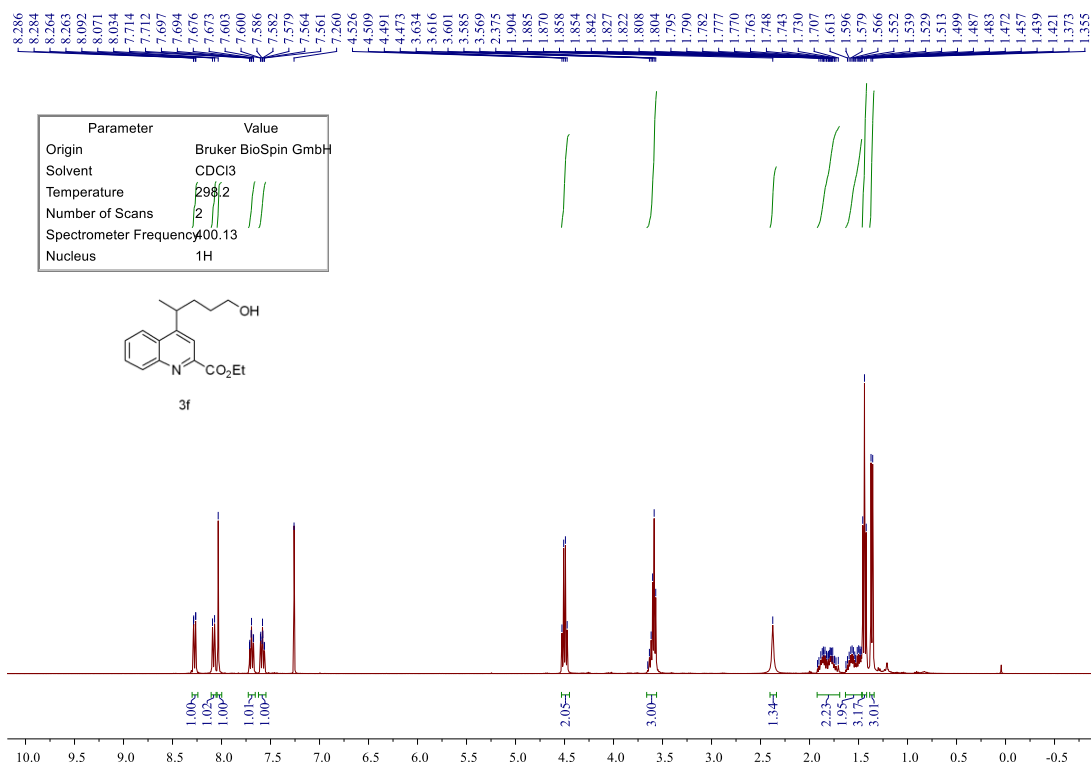

Supplementary Figure 12. <sup>1</sup>H NMR (400 MHz, CDCl<sub>3</sub>) spectra for compound 3f.

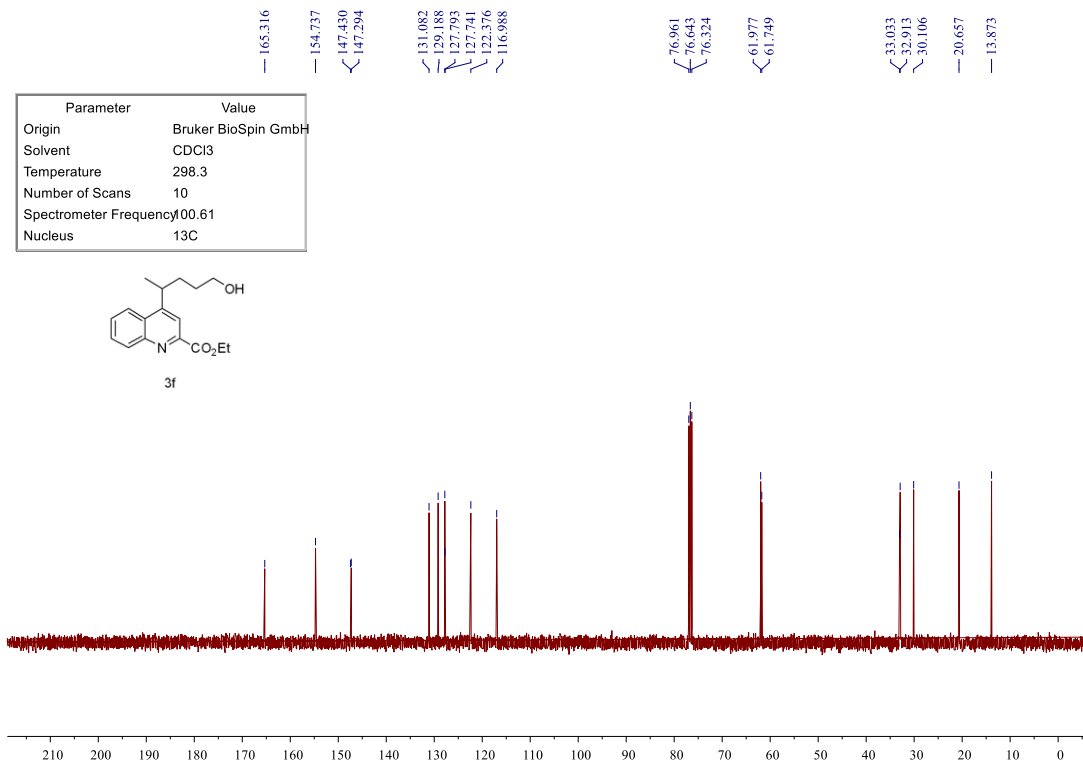

Supplementary Figure 13. <sup>13</sup>C NMR (100 MHz, CDCl<sub>3</sub>) spectra for compound 3f.



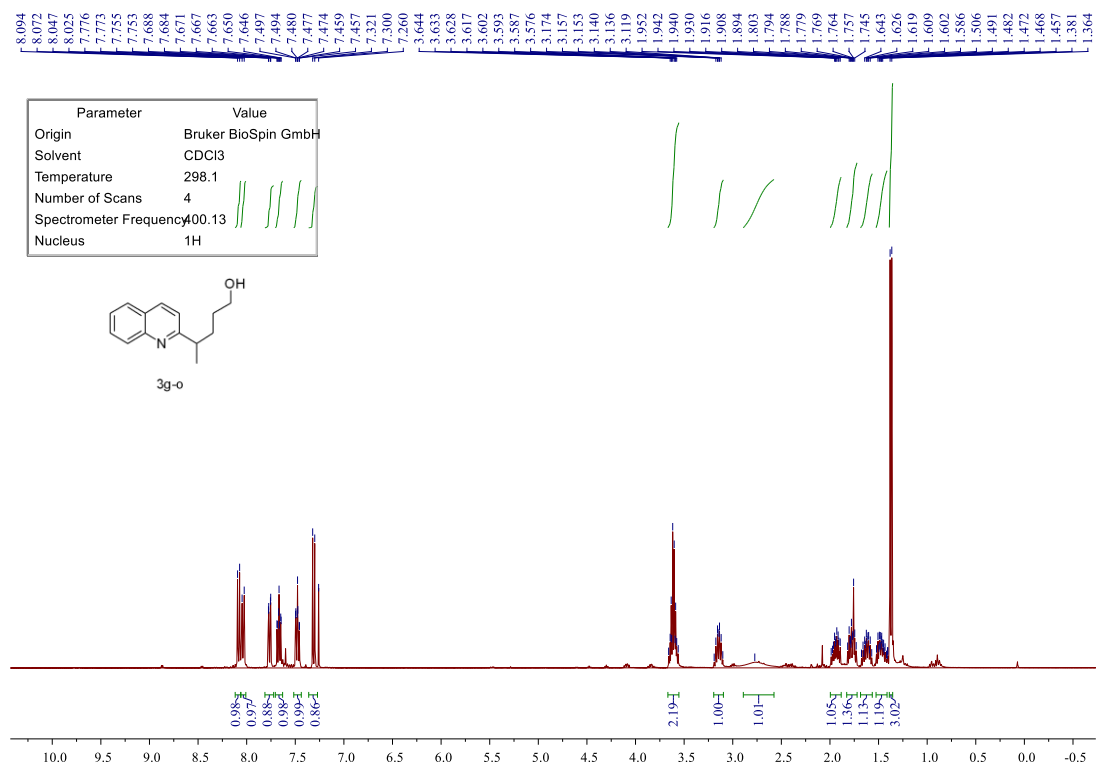

Supplementary Figure 14. <sup>1</sup>H NMR (400 MHz, CDCl<sub>3</sub>) spectra for compound 3g-o.

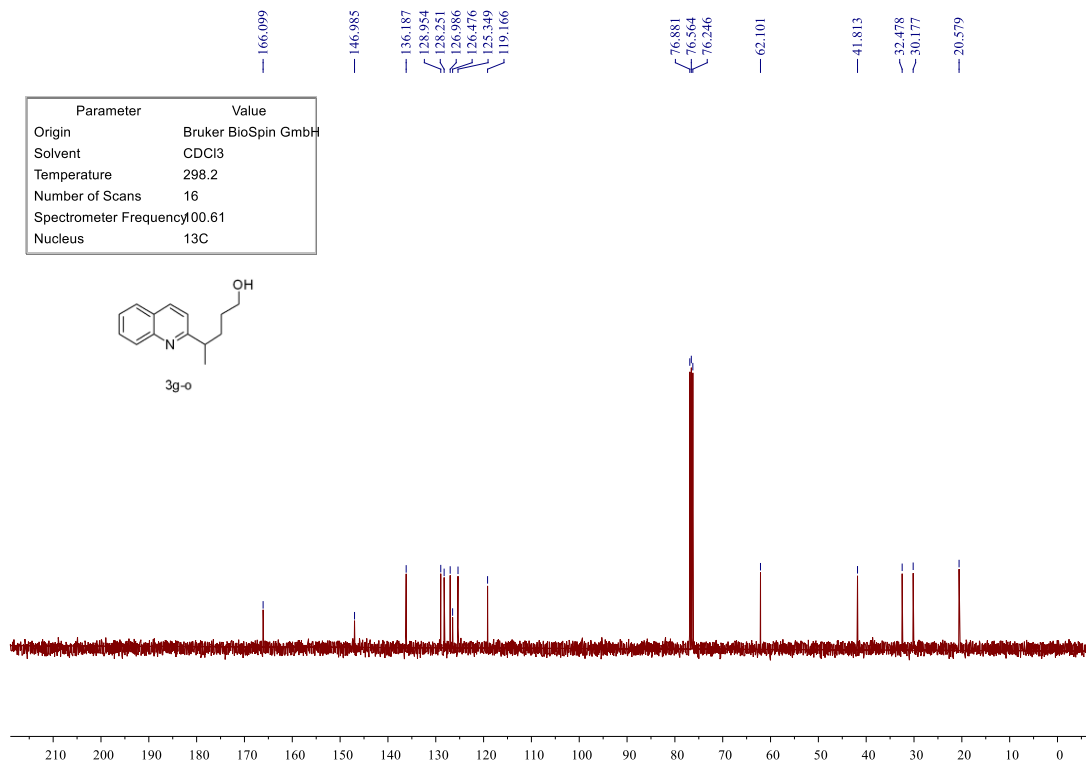

Supplementary Figure 15. <sup>13</sup>C NMR (100 MHz, CDCl<sub>3</sub>) spectra for compound 3g-o.

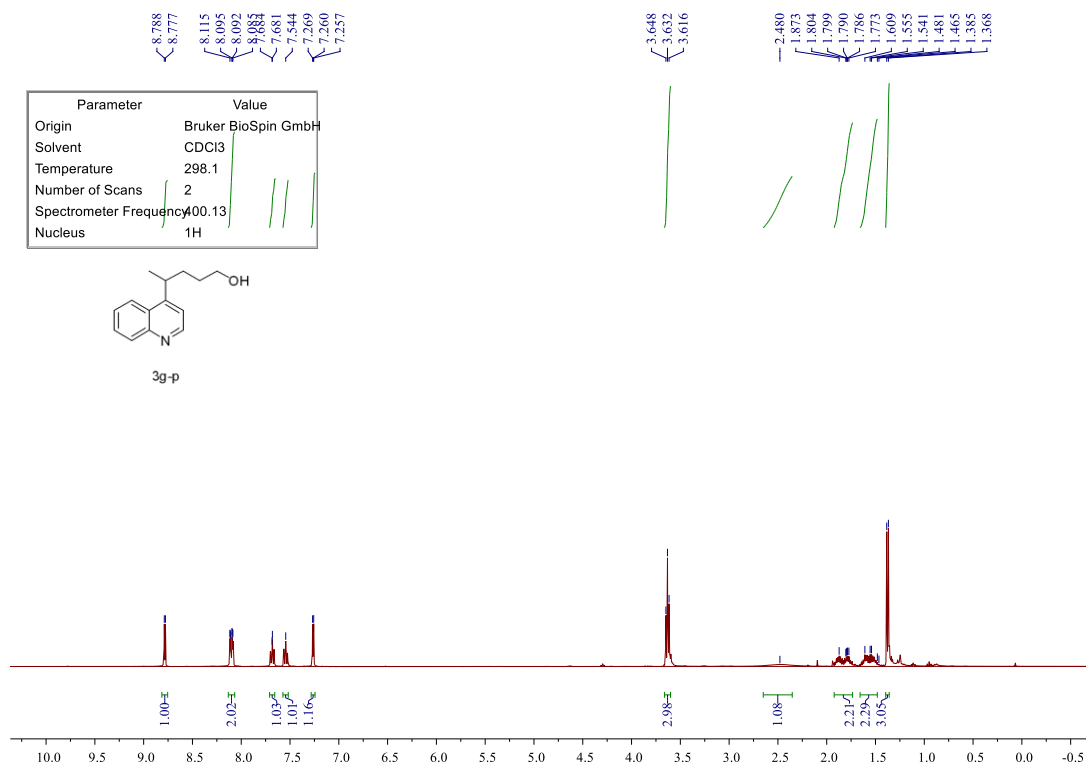

Supplementary Figure 16. <sup>1</sup>H NMR (400 MHz, CDCl<sub>3</sub>) spectra for compound 3g-p.

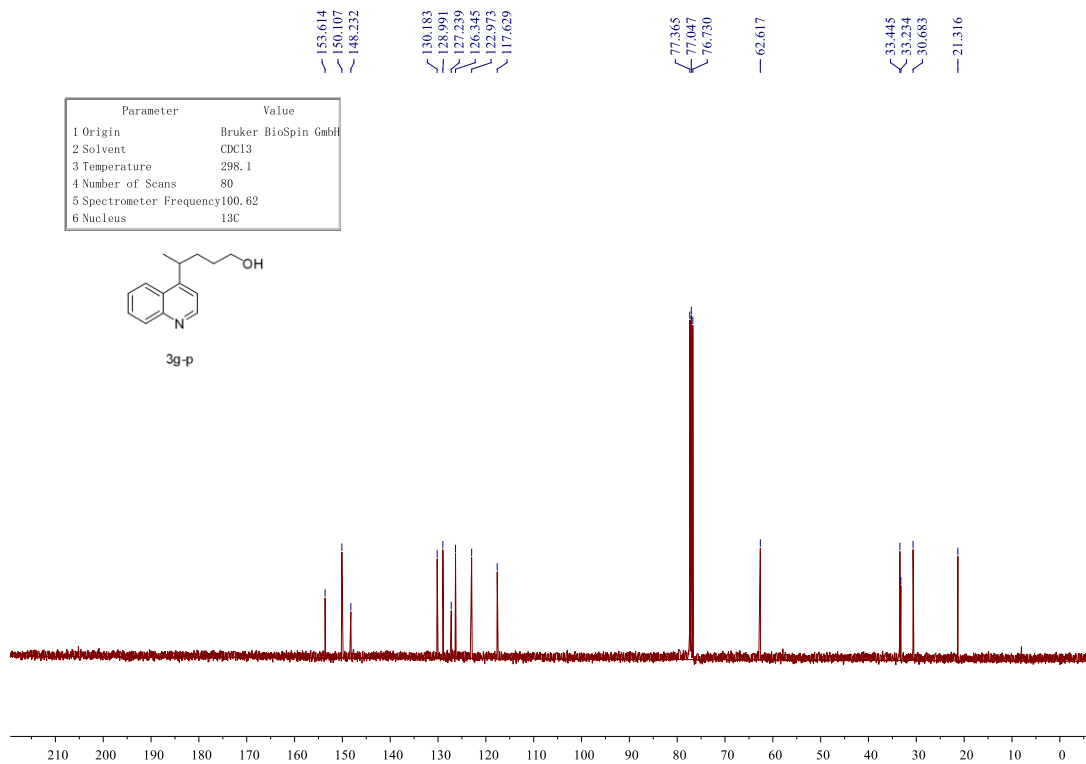

Supplementary Figure 17. <sup>13</sup>C NMR (100 MHz, CDCl<sub>3</sub>) spectra for compound 3g-p.

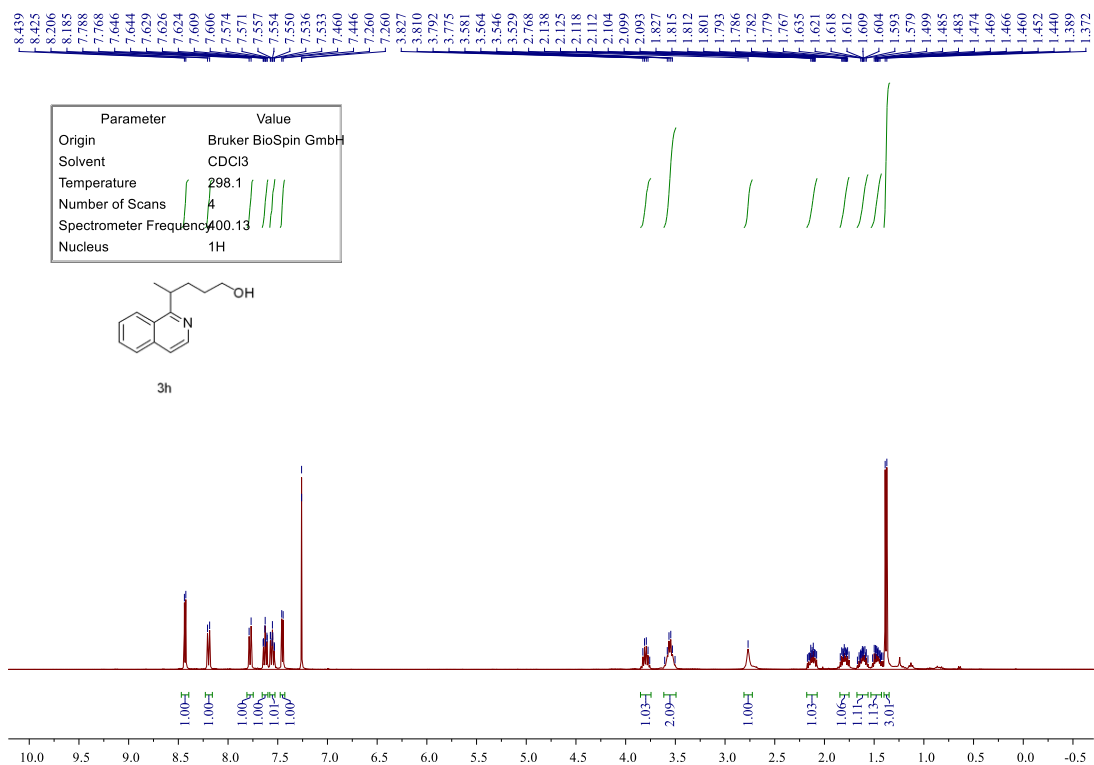

Supplementary Figure 18. <sup>1</sup>H NMR (400 MHz, CDCl<sub>3</sub>) spectra for compound 3h.

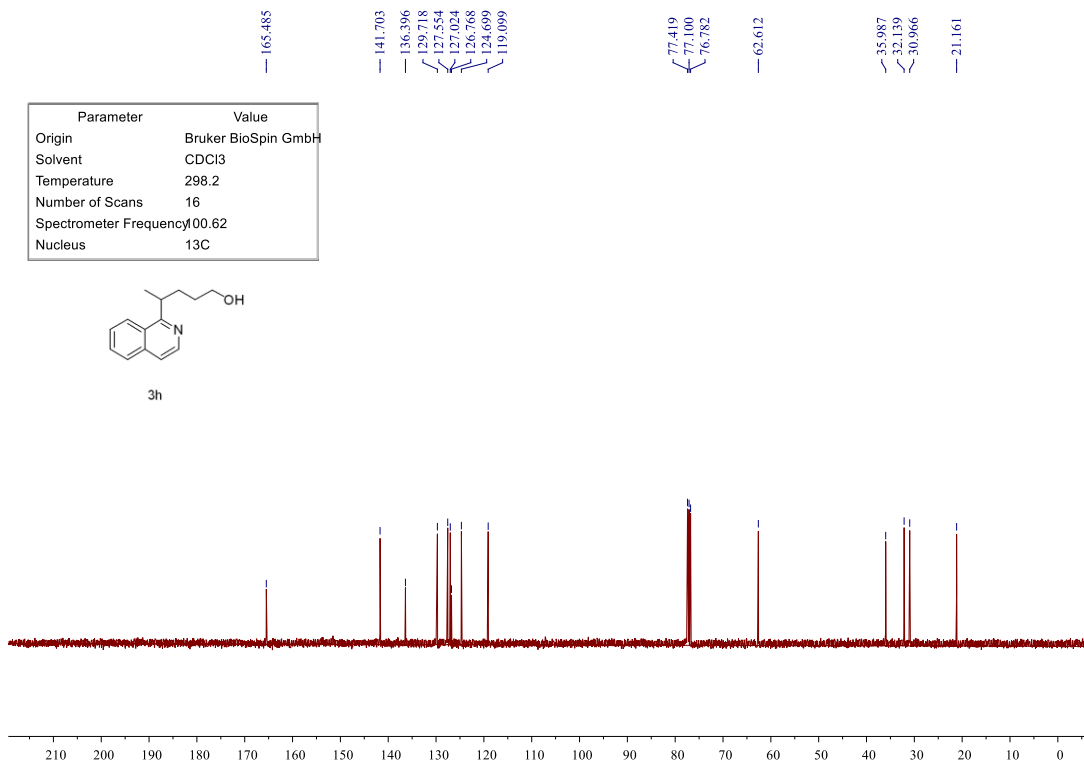

Supplementary Figure 19. <sup>13</sup>C NMR (100 MHz, CDCl<sub>3</sub>) spectra for compound 3h.

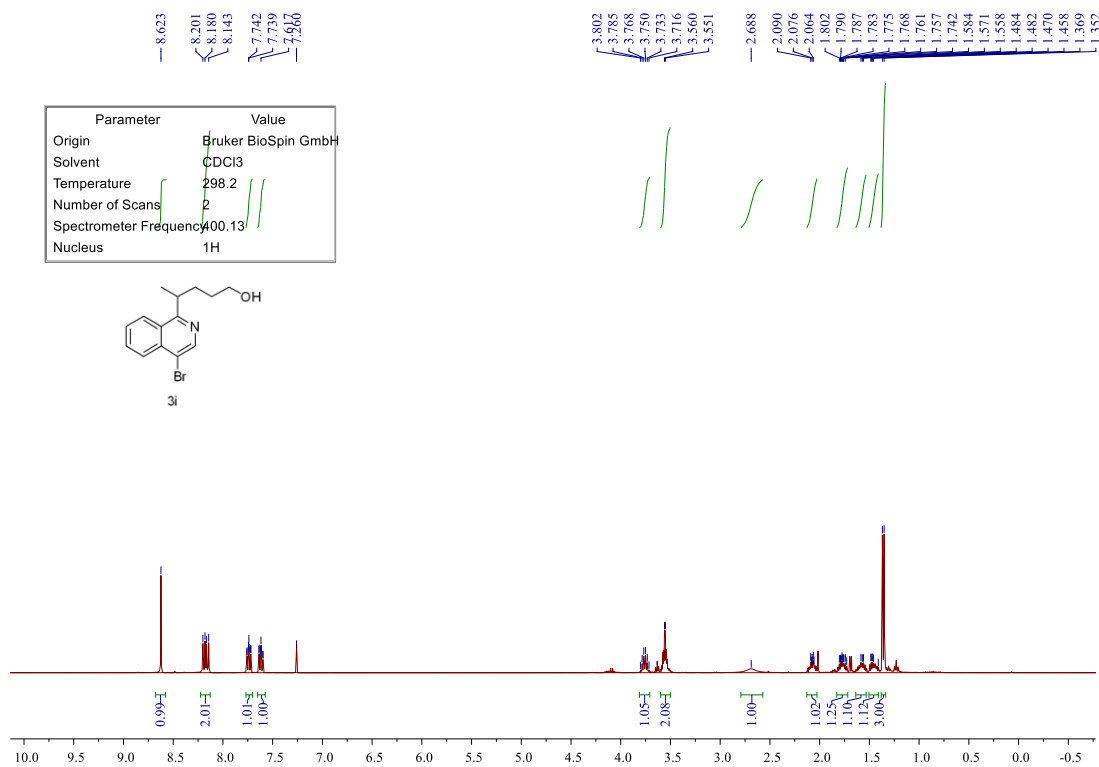

Supplementary Figure 20. <sup>1</sup>H NMR (400 MHz, CDCl<sub>3</sub>) spectra for compound 3i.

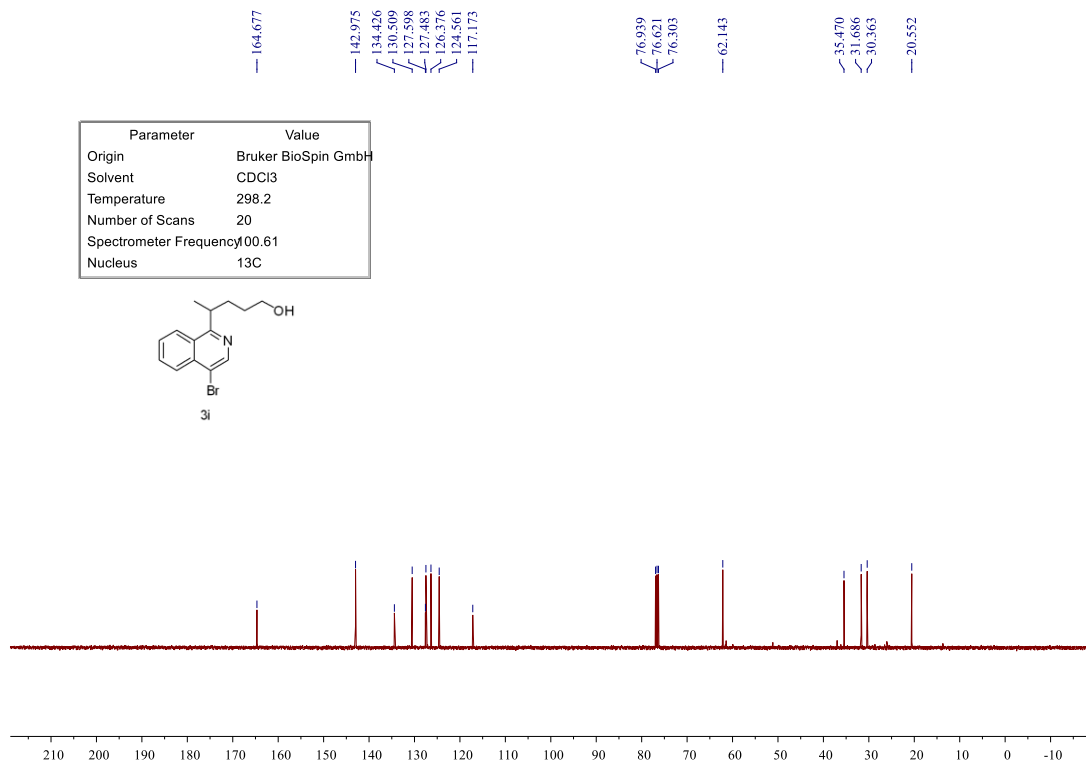

Supplementary Figure 21. <sup>13</sup>C NMR (100 MHz, CDCl<sub>3</sub>) spectra for compound 3i.

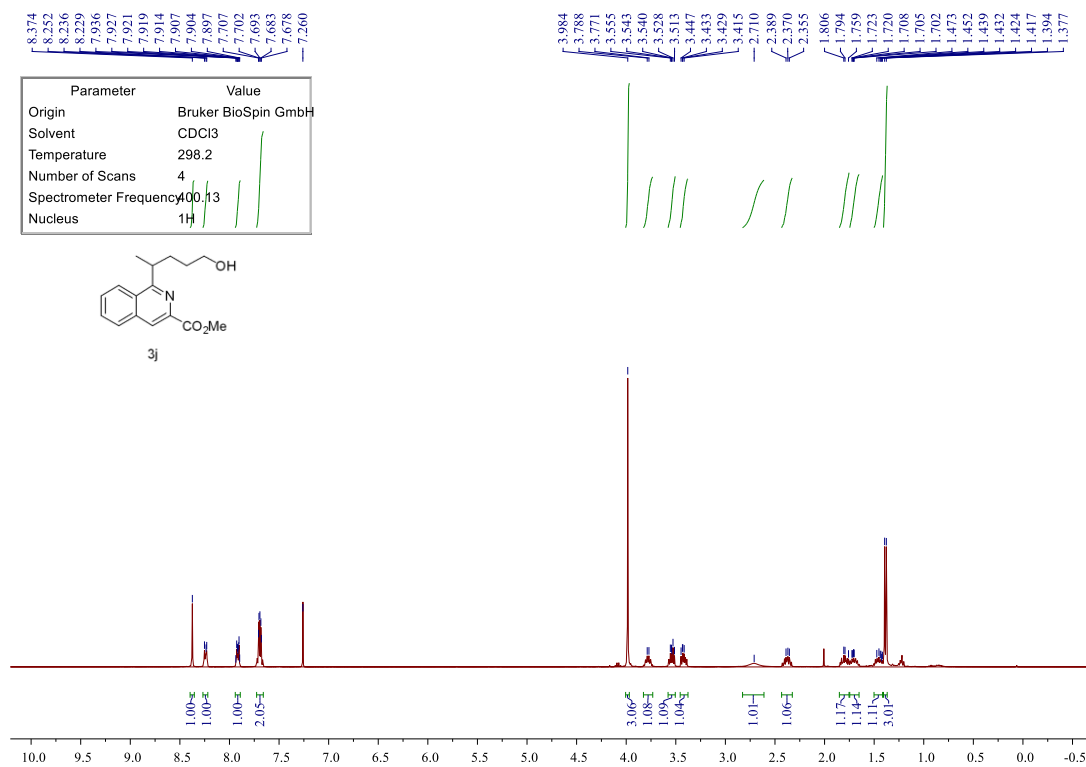

Supplementary Figure 22. <sup>1</sup>H NMR (400 MHz, CDCl<sub>3</sub>) spectra for compound 3j.

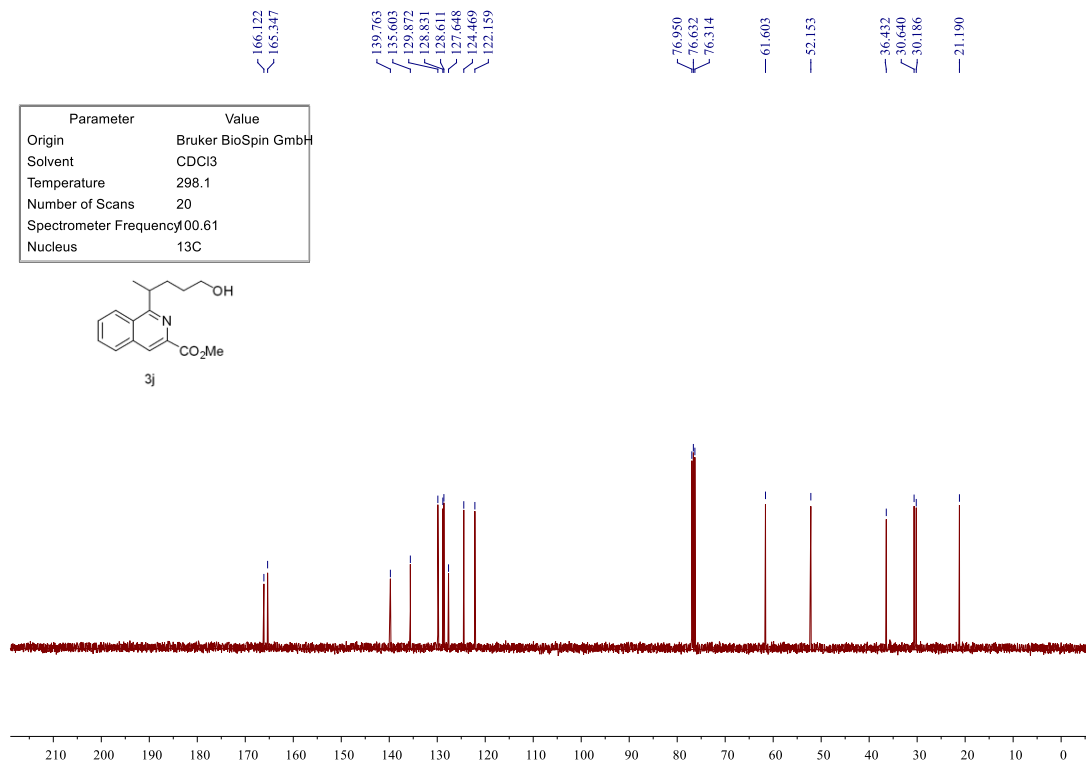

Supplementary Figure 23. <sup>13</sup>C NMR (100 MHz, CDCl<sub>3</sub>) spectra for compound 3j.

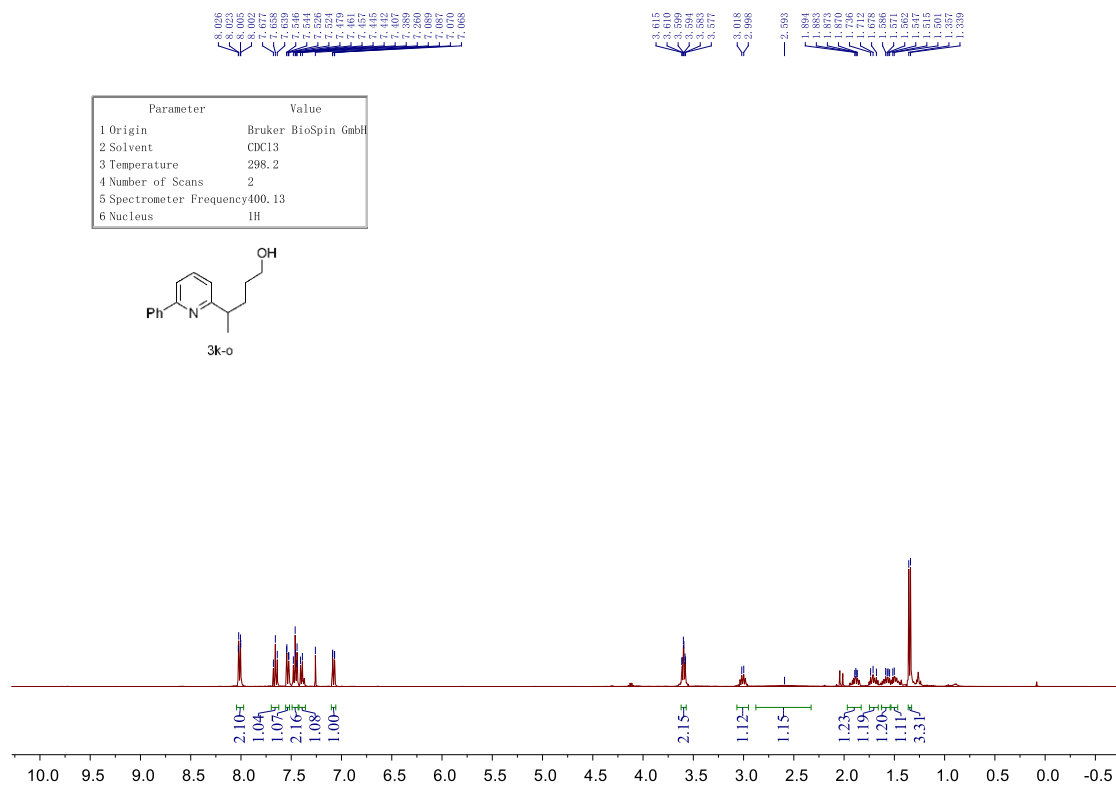

Supplementary Figure 24. <sup>1</sup>H NMR (400 MHz, CDCl<sub>3</sub>) spectra for compound 3k-o.

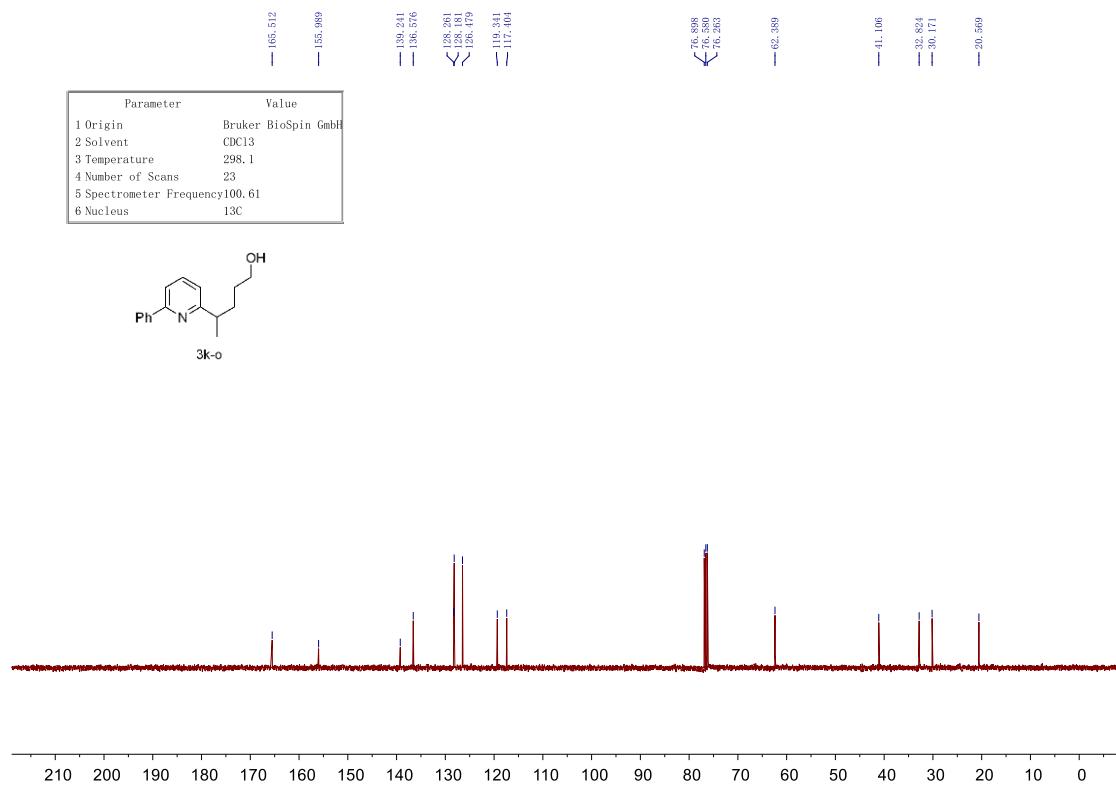

Supplementary Figure 25. <sup>13</sup>C NMR (100 MHz, CDCl<sub>3</sub>) spectra for compound 3k-o.

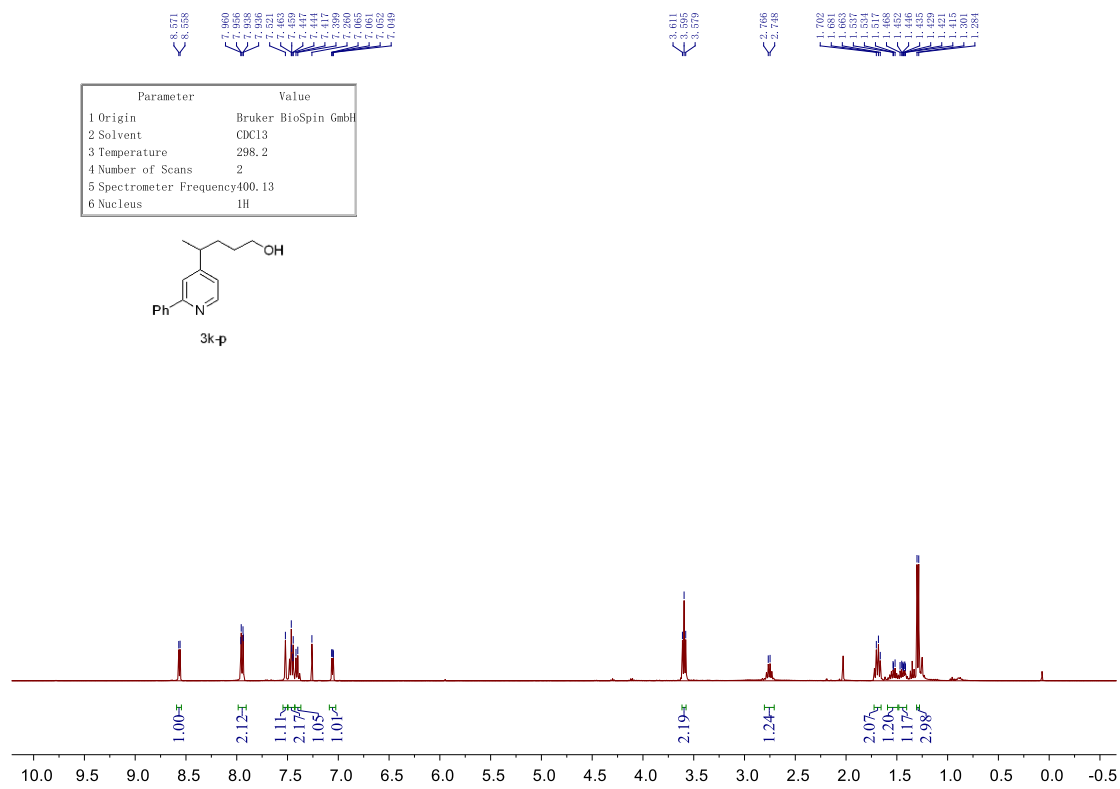

Supplementary Figure 26. <sup>1</sup>H NMR (400 MHz, CDCl<sub>3</sub>) spectra for compound 3k-p.

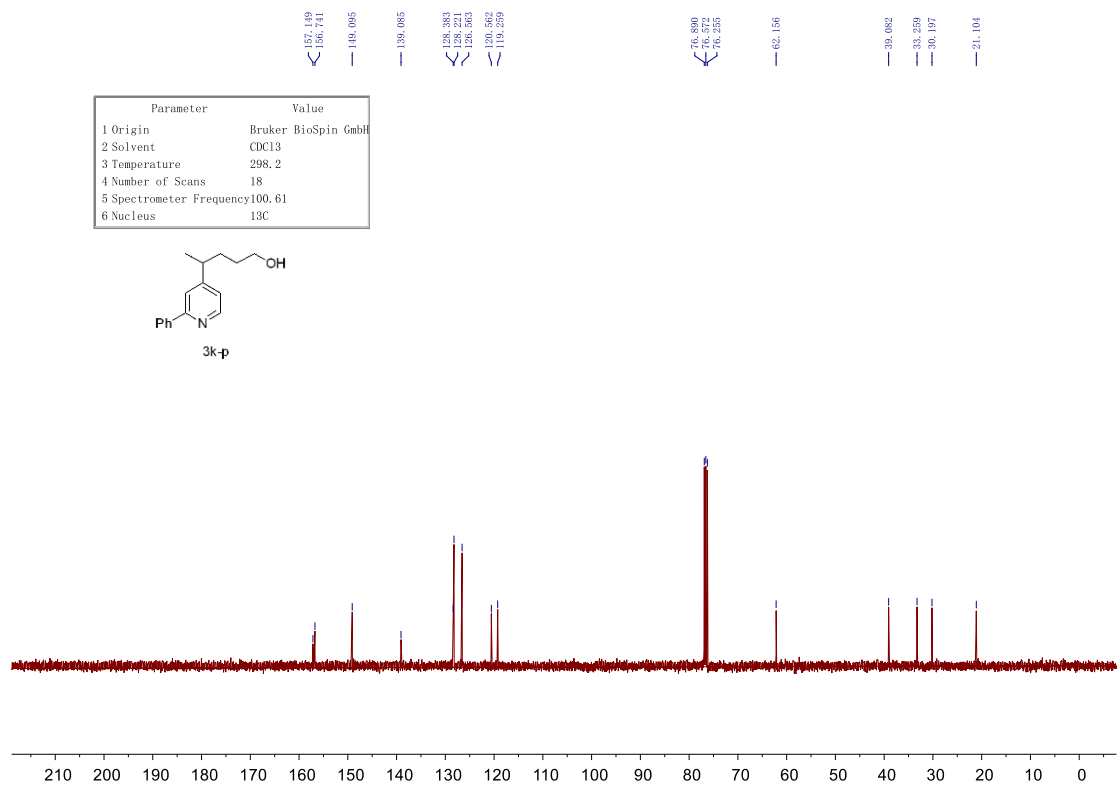

Supplementary Figure 27. <sup>13</sup>C NMR (100 MHz, CDCl<sub>3</sub>) spectra for compound 3k-p.



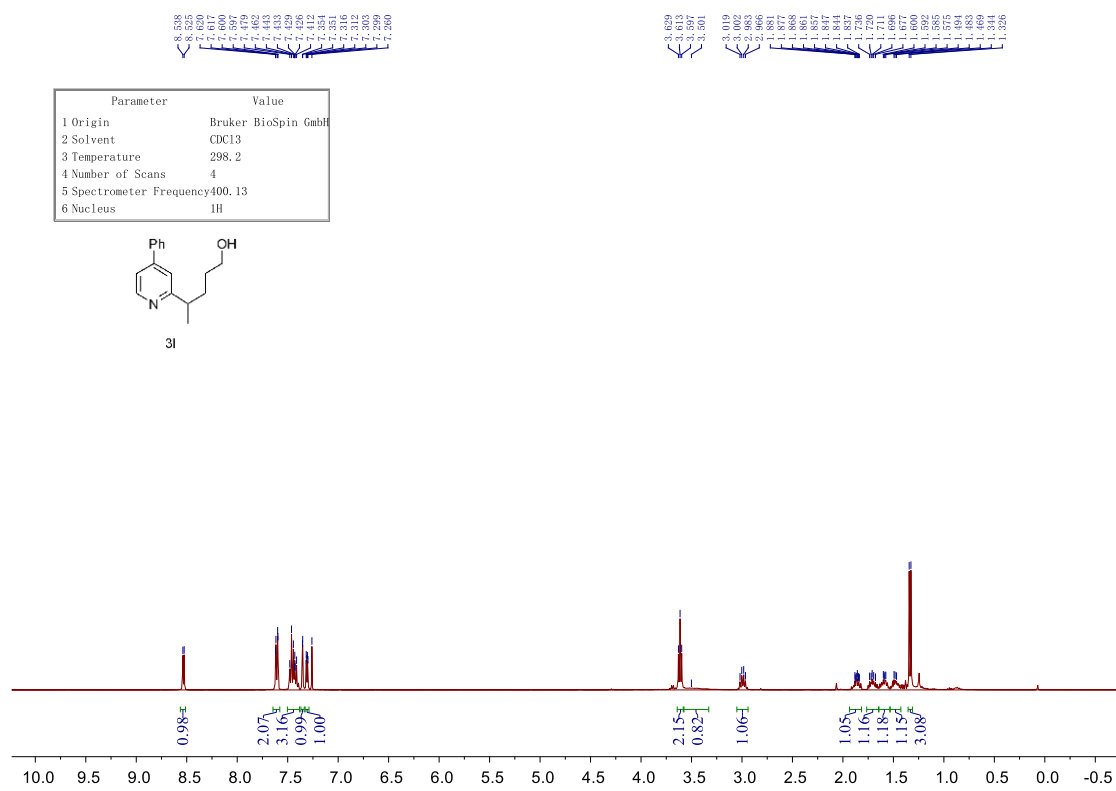

Supplementary Figure 28. <sup>1</sup>H NMR (400 MHz, CDCl<sub>3</sub>) spectra for compound 3I.

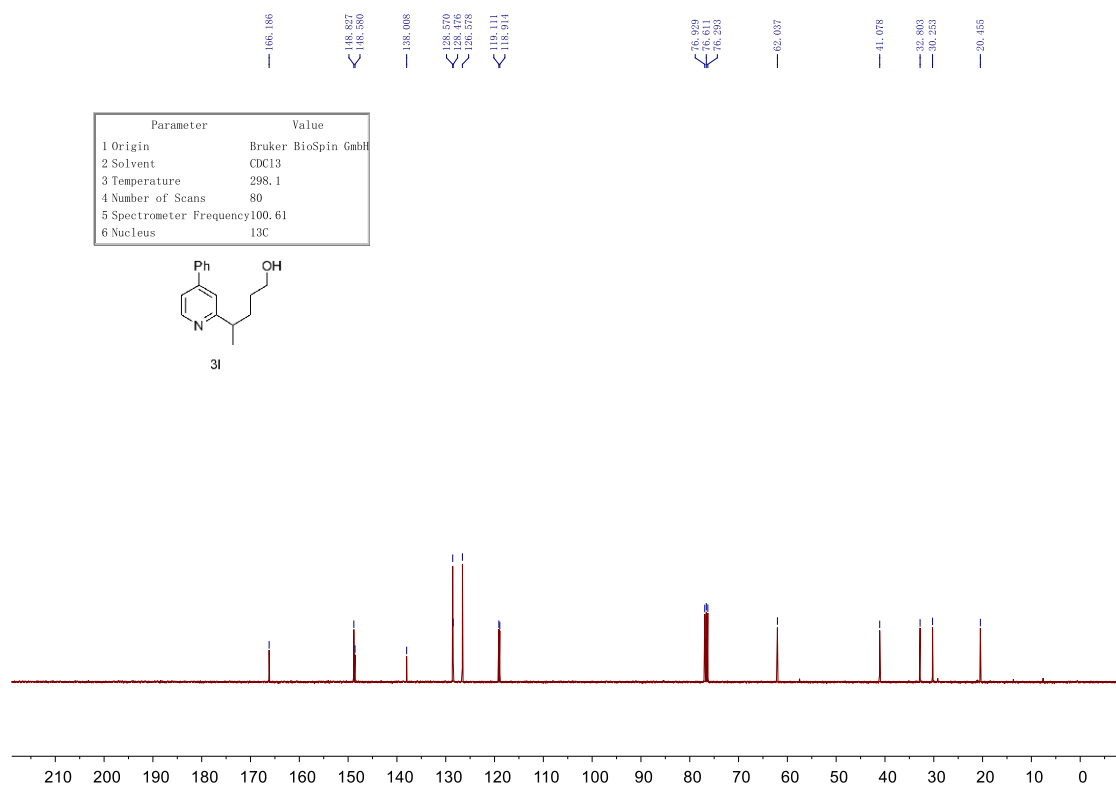

Supplementary Figure 29. <sup>13</sup>C NMR (100 MHz, CDCl<sub>3</sub>) spectra for compound 3I.

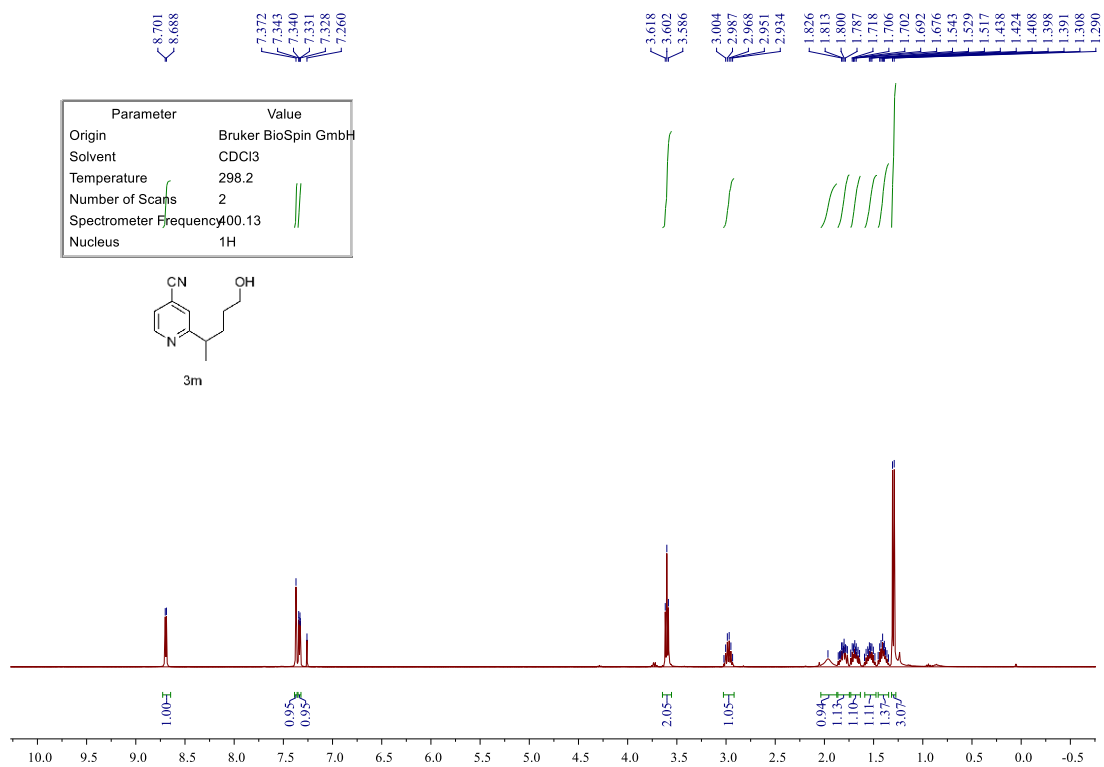

Supplementary Figure 30. <sup>1</sup>H NMR (400 MHz, CDCl<sub>3</sub>) spectra for compound **3m**.

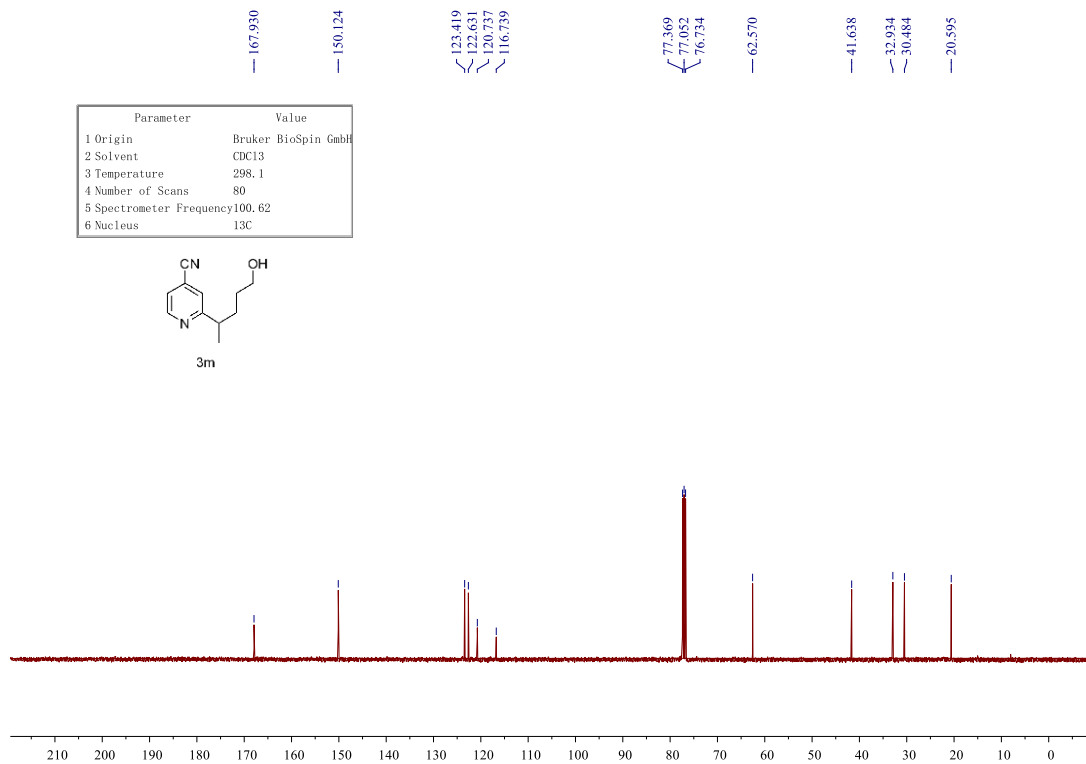

Supplementary Figure 31. <sup>13</sup>C NMR (100 MHz, CDCl<sub>3</sub>) spectra for compound **3m**.



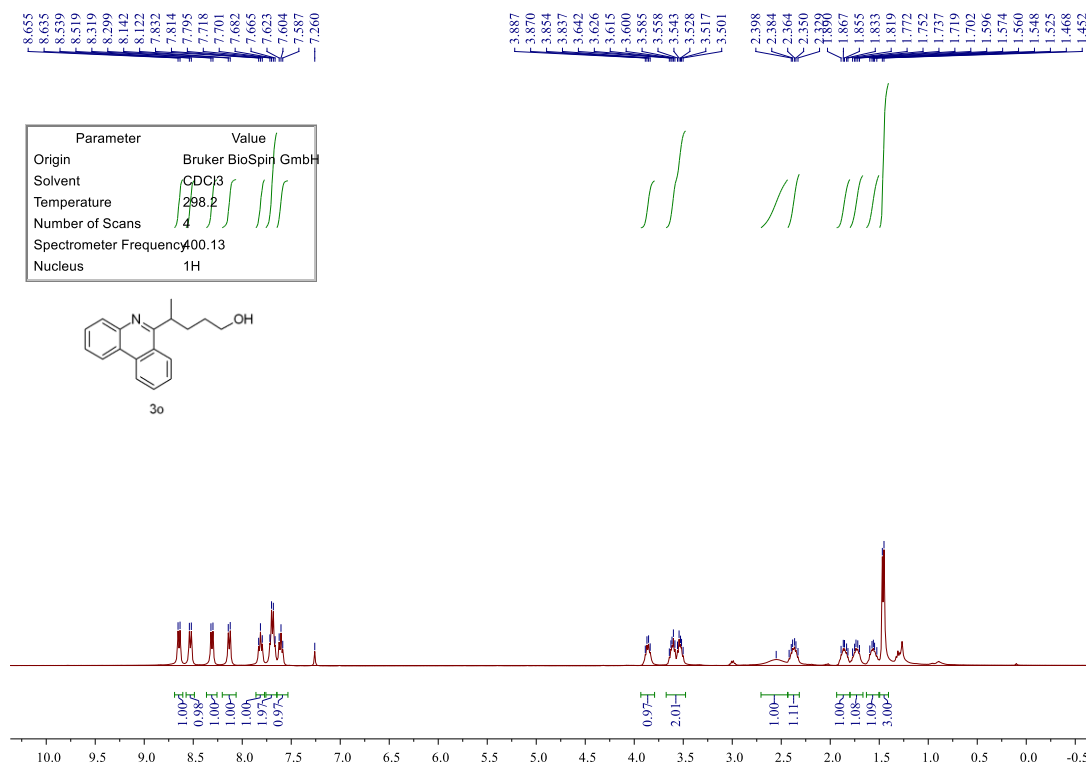

Supplementary Figure 34. <sup>1</sup>H NMR (400 MHz, CDCl<sub>3</sub>) spectra for compound 3o.

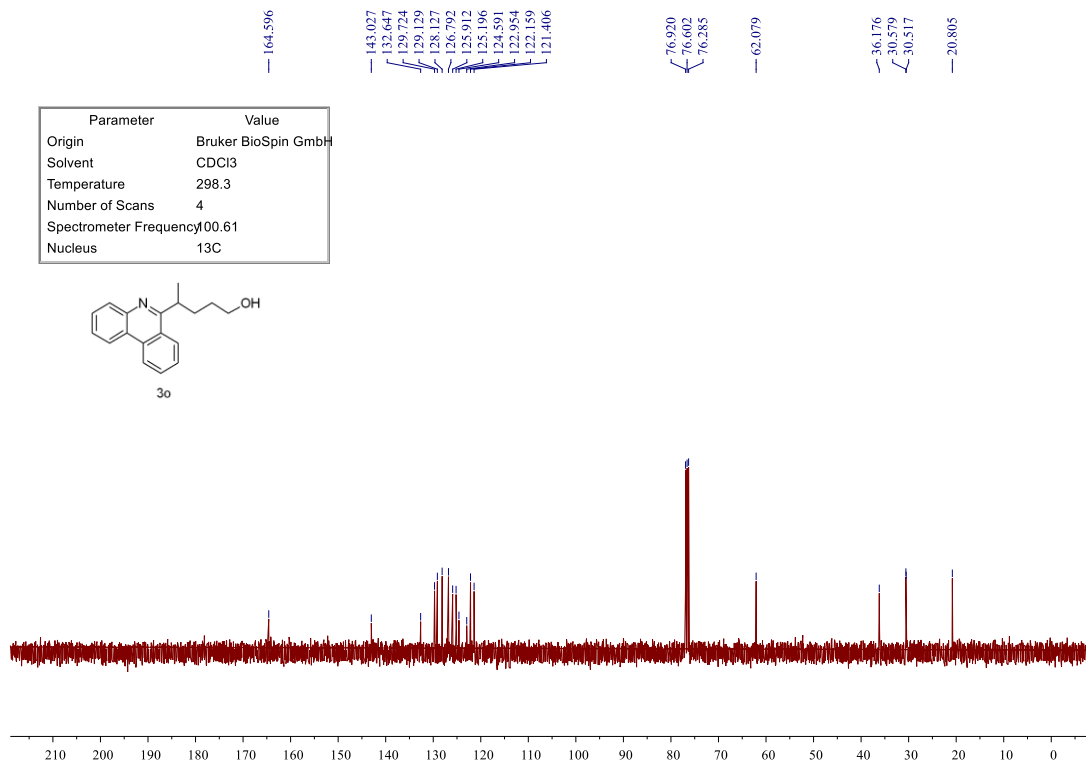

Supplementary Figure 35. <sup>13</sup>C NMR (100 MHz, CDCl<sub>3</sub>) spectra for compound 3o.

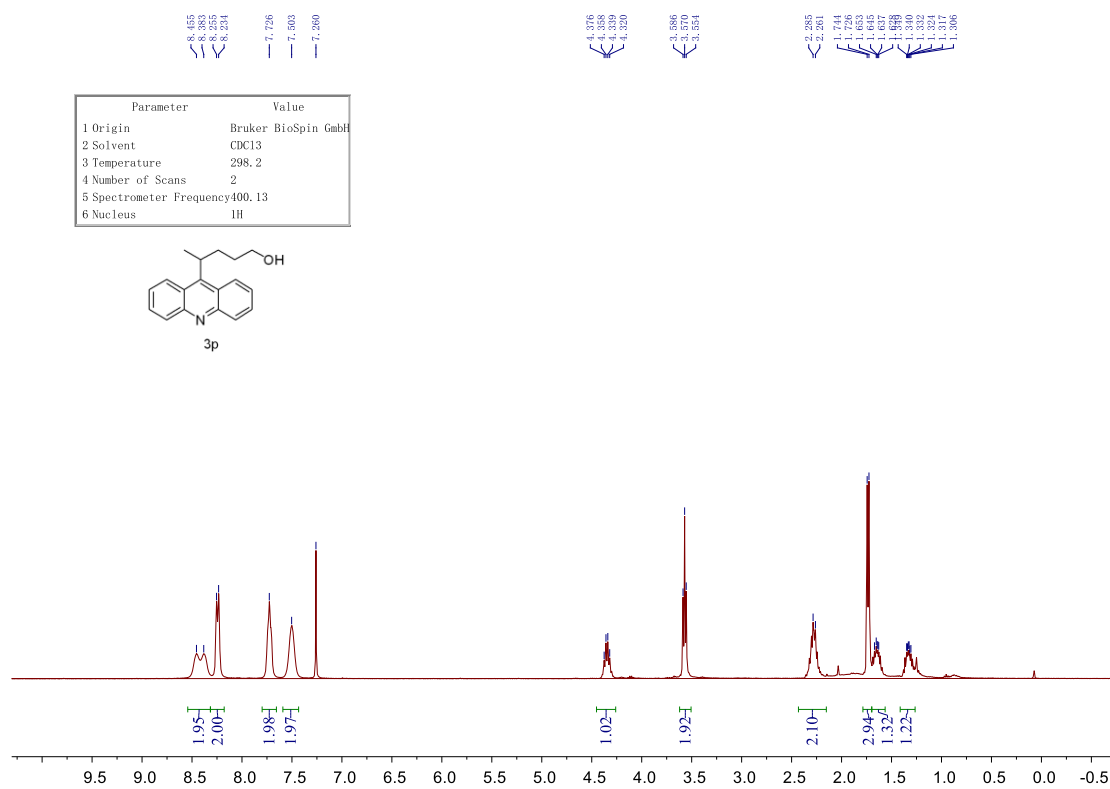

Supplementary Figure 36.  $^1\text{H}$  NMR (400 MHz,  $\text{CDCl}_3$ ) spectra for compound 3p.

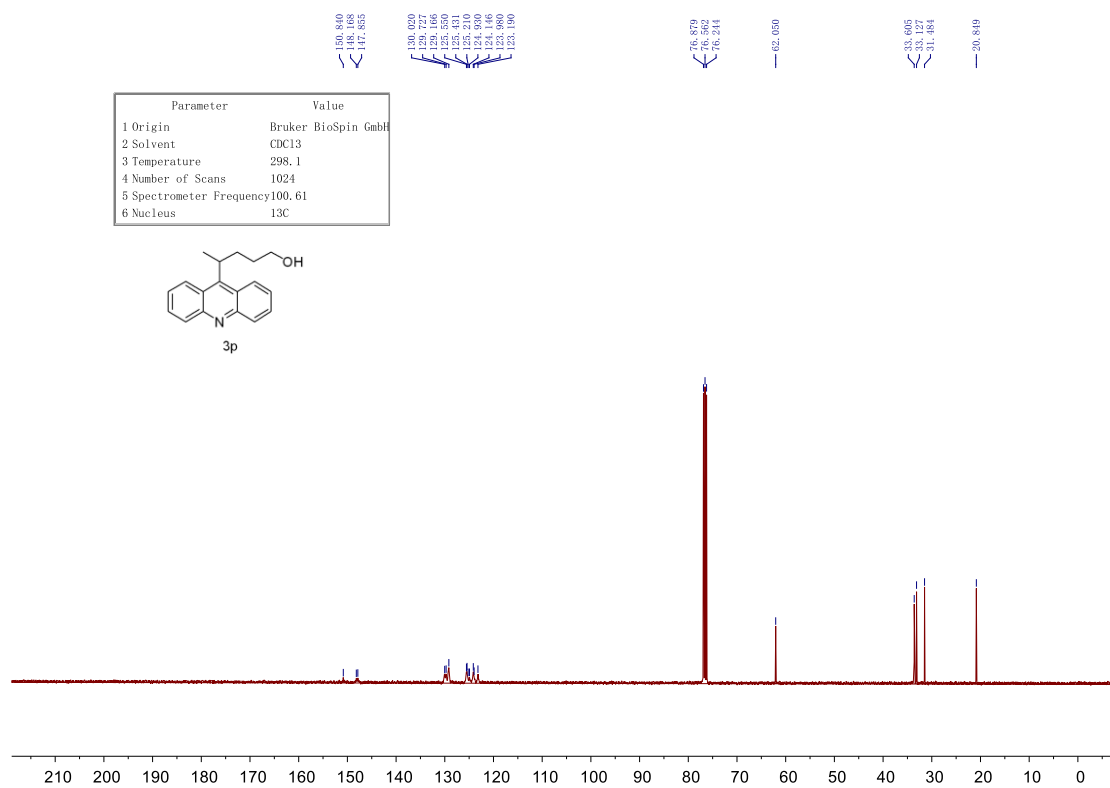

Supplementary Figure 37.  $^{13}\text{C}$  NMR (100 MHz,  $\text{CDCl}_3$ ) spectra for compound 3p.

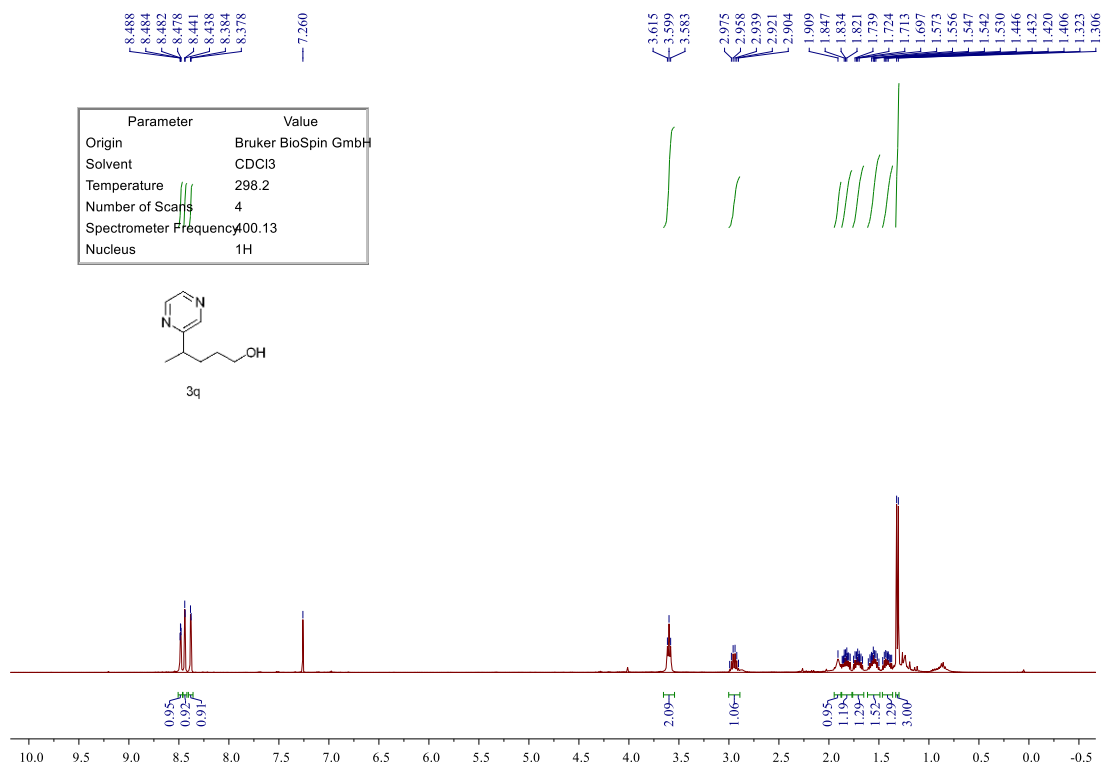

Supplementary Figure 38. <sup>1</sup>H NMR (400 MHz, CDCl<sub>3</sub>) spectra for compound 3q.

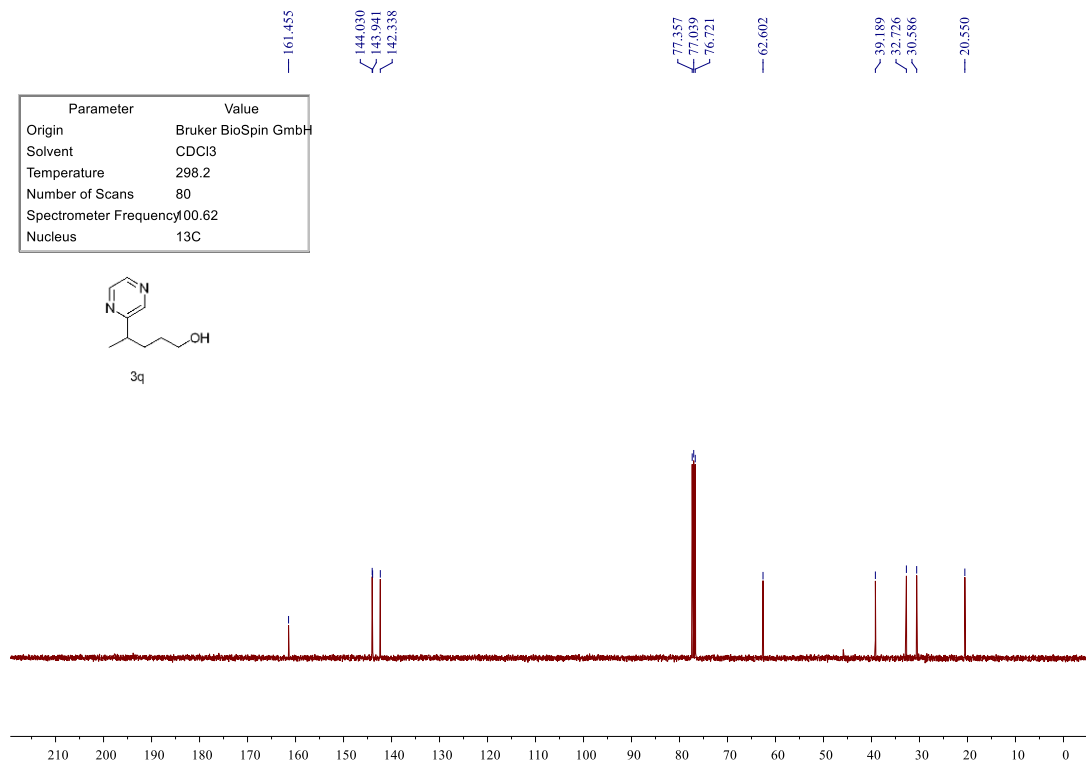

Supplementary Figure 39. <sup>13</sup>C NMR (100 MHz, CDCl<sub>3</sub>) spectra for compound 3q.

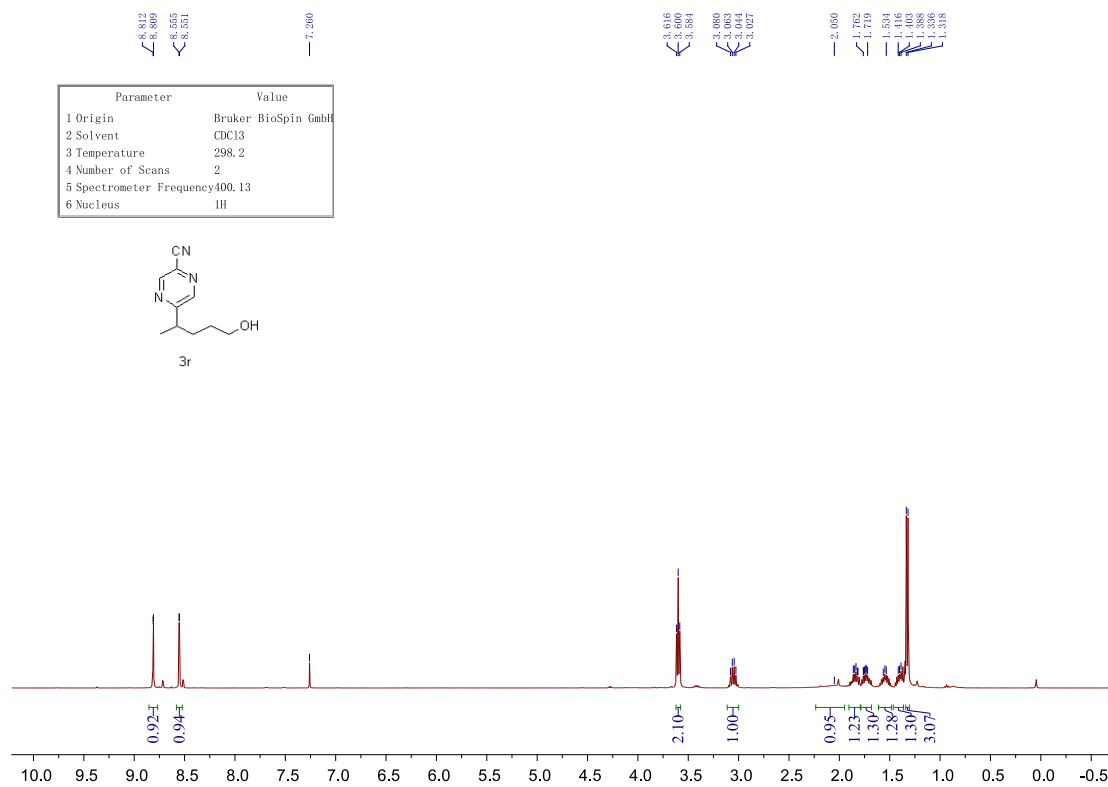

Supplementary Figure 40. <sup>1</sup>H NMR (400 MHz, CDCl<sub>3</sub>) spectra for compound 3r.

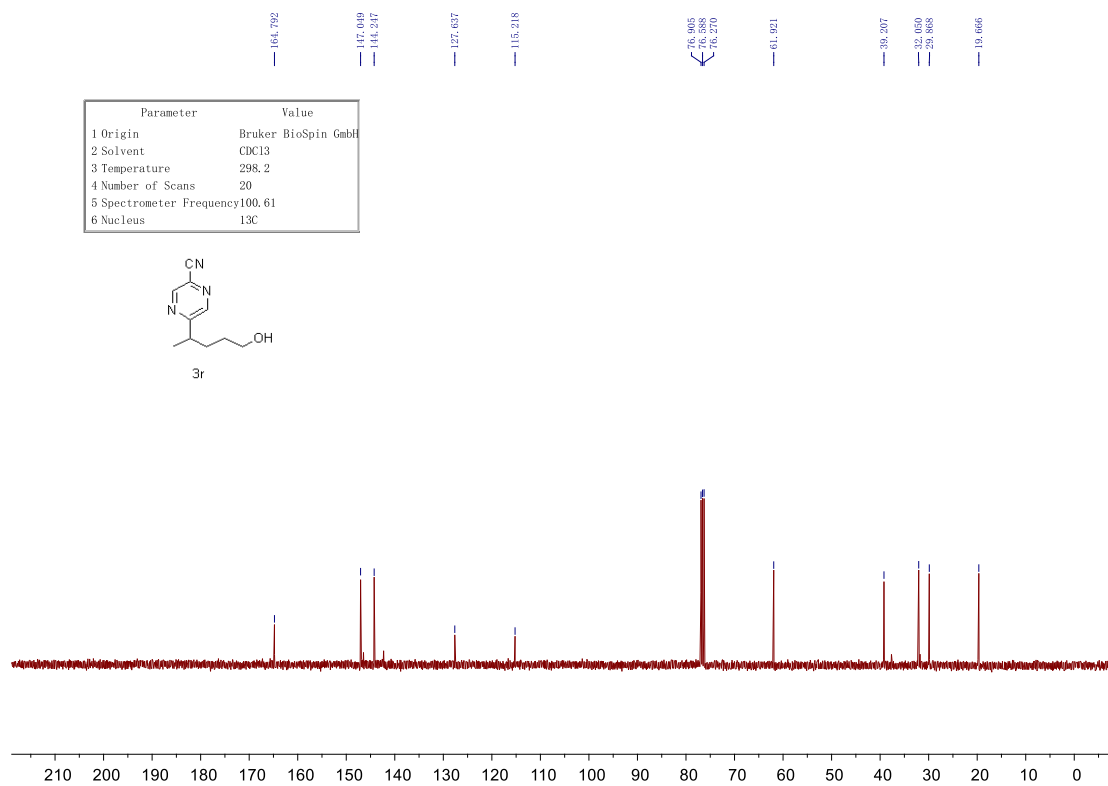

Supplementary Figure 41. <sup>13</sup>C NMR (100 MHz, CDCl<sub>3</sub>) spectra for compound 3r.



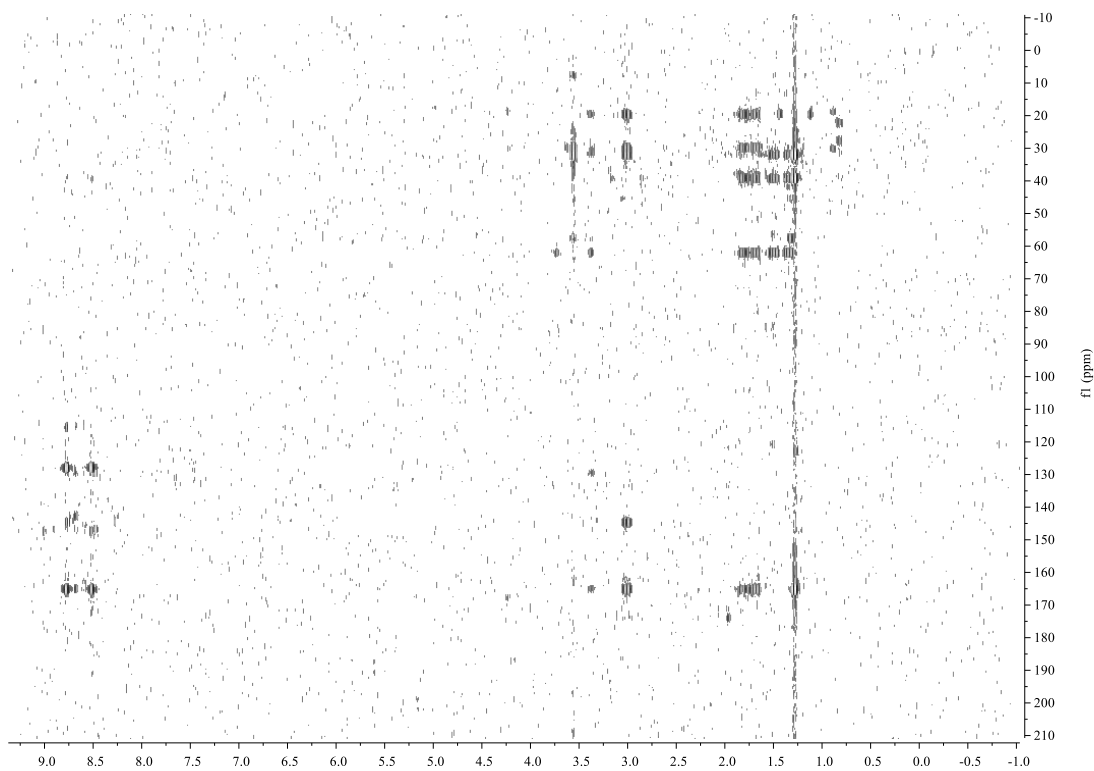

Supplementary Figure 42. HMBC spectra for compound 3r.

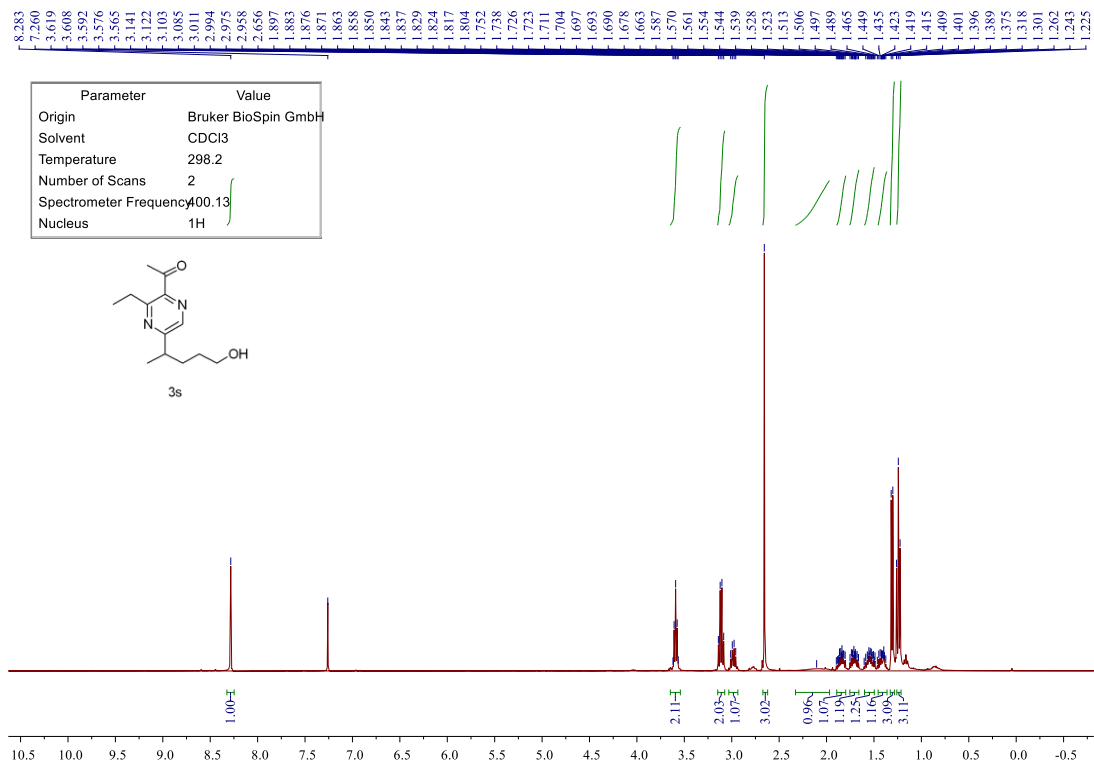

Supplementary Figure 43. <sup>1</sup>H NMR (400 MHz, CDCl<sub>3</sub>) spectra for compound 3s.

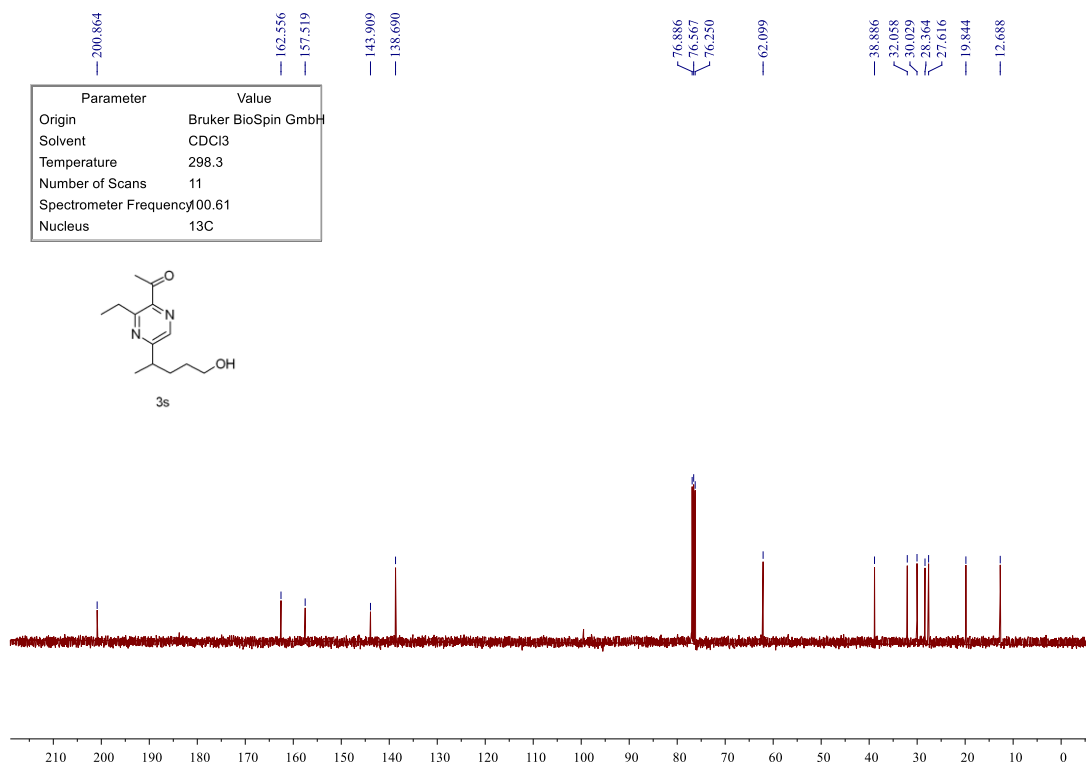

Supplementary Figure 44. <sup>13</sup>C NMR (100 MHz, CDCl<sub>3</sub>) spectra for compound 3s.

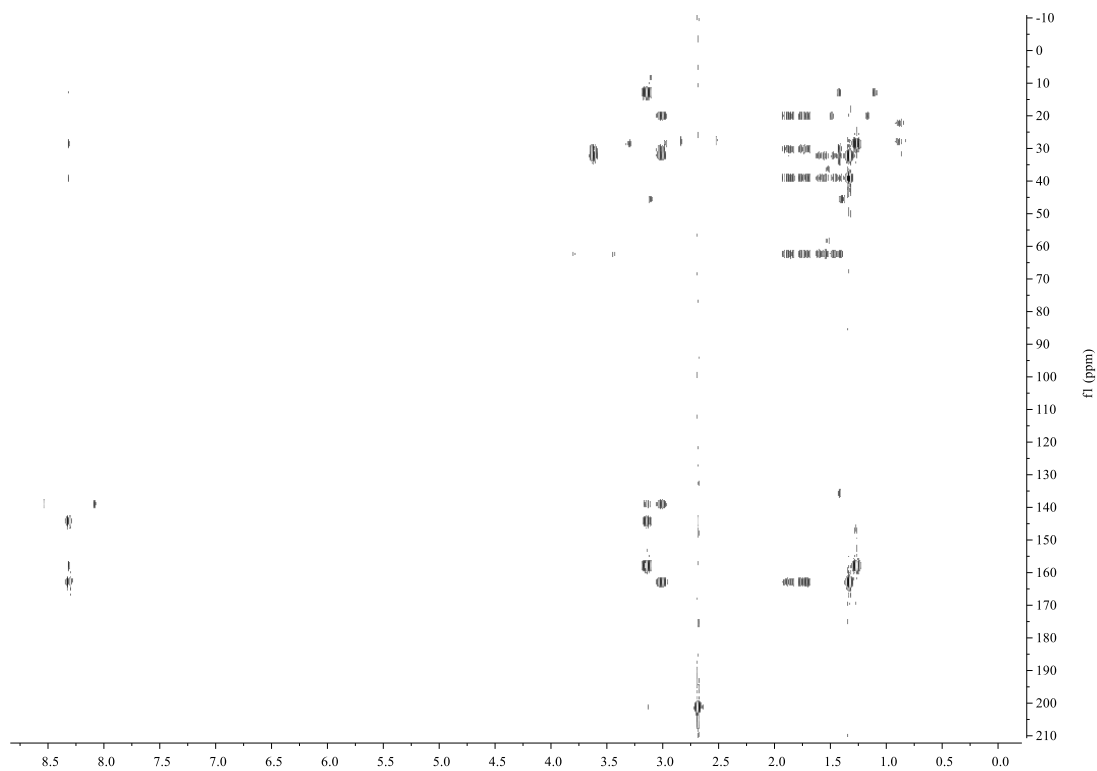

Supplementary Figure 45. HMBC spectra for compound 3s.

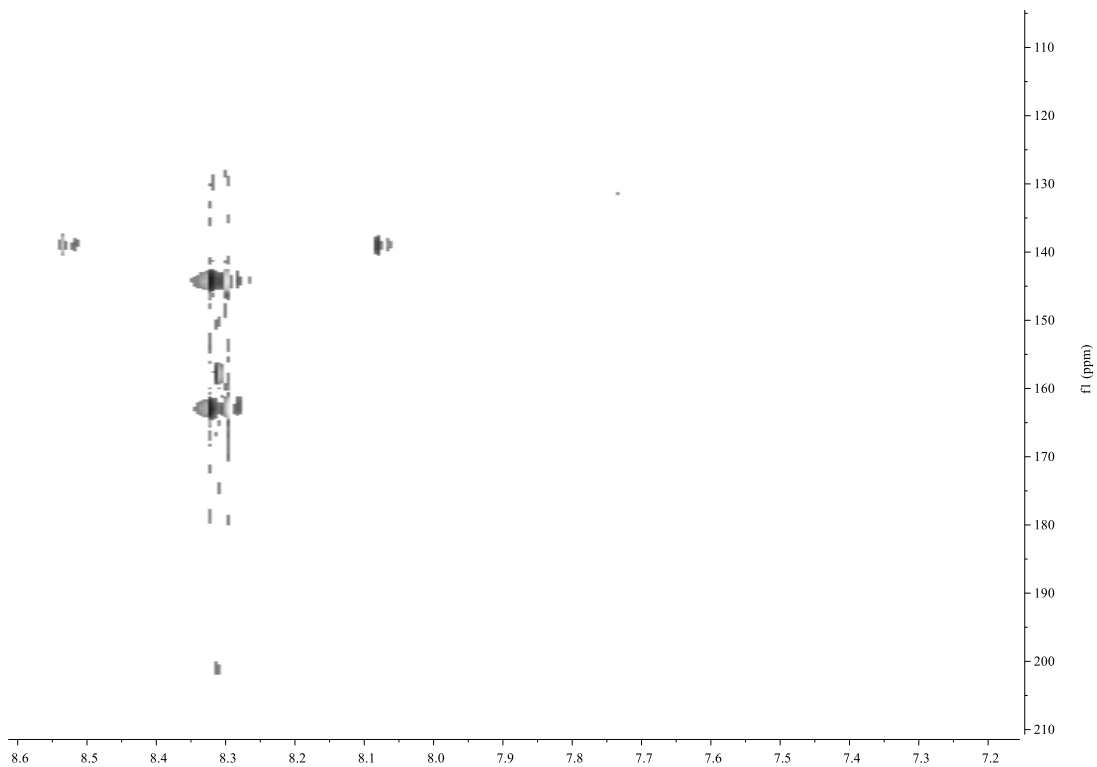

Supplementary Figure 46. Magnified HMBC spectra for compound 3s.

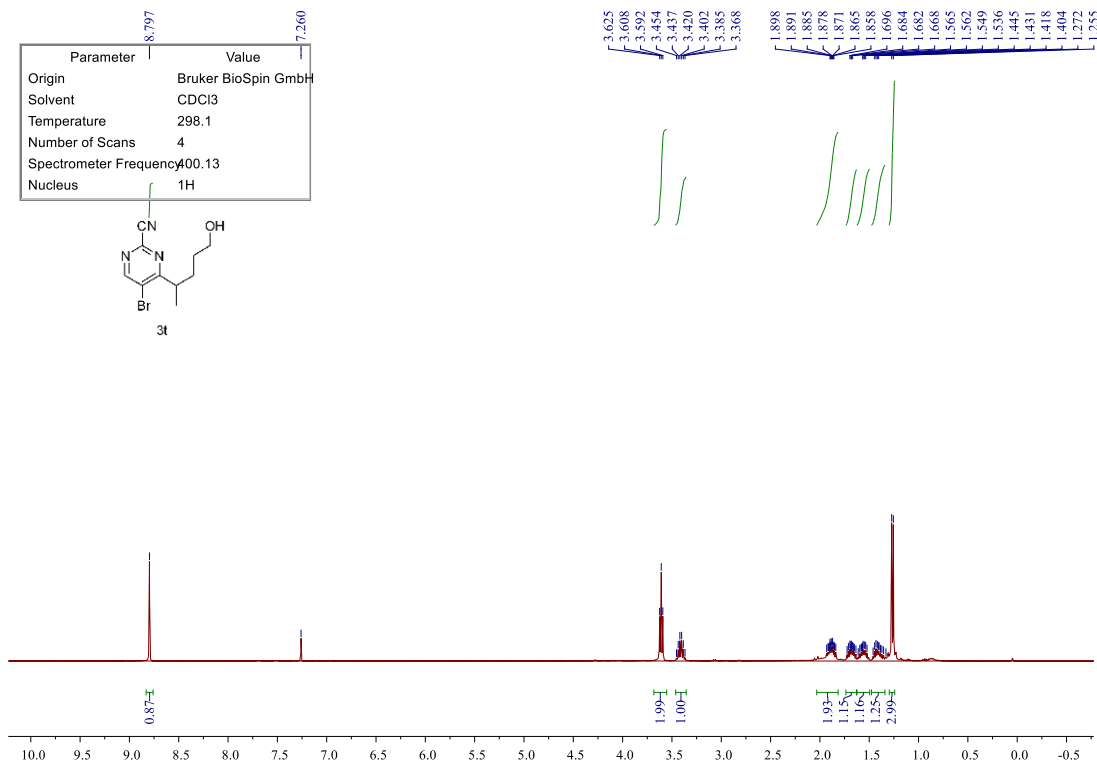

Supplementary Figure 47. <sup>1</sup>H NMR (400 MHz, CDCl<sub>3</sub>) spectra for compound 3t.

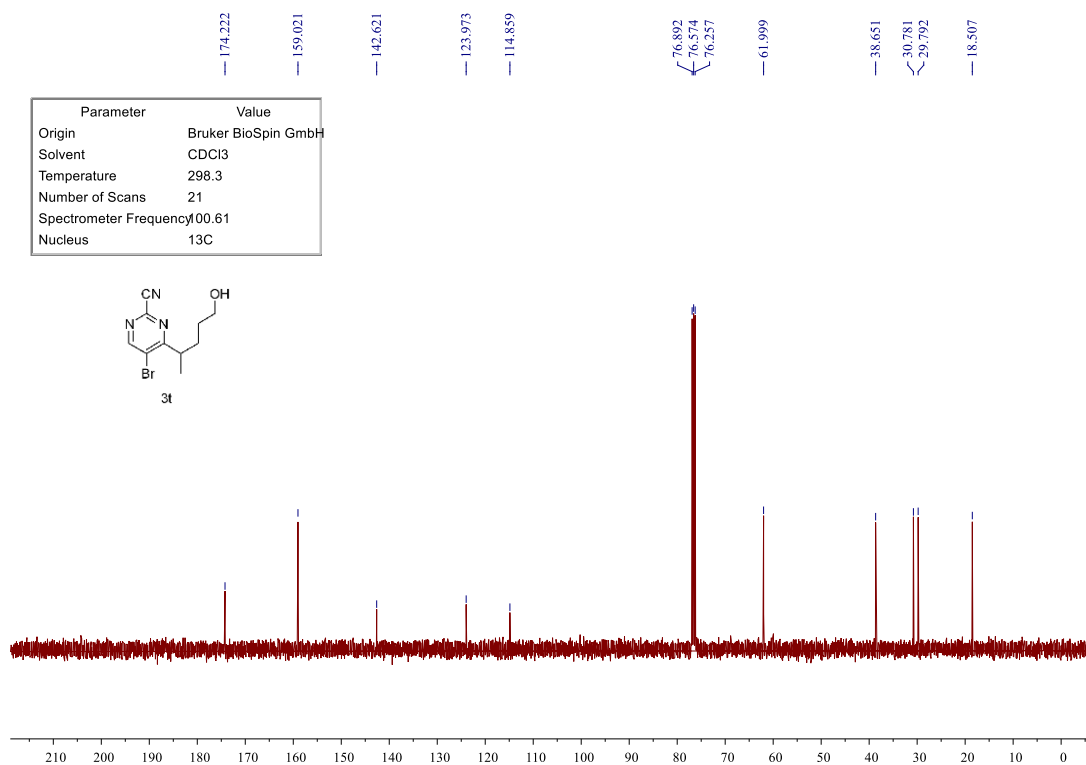

**Supplementary Figure 48. <sup>13</sup>C NMR (100 MHz, CDCl<sub>3</sub>) spectra for compound 3t.**

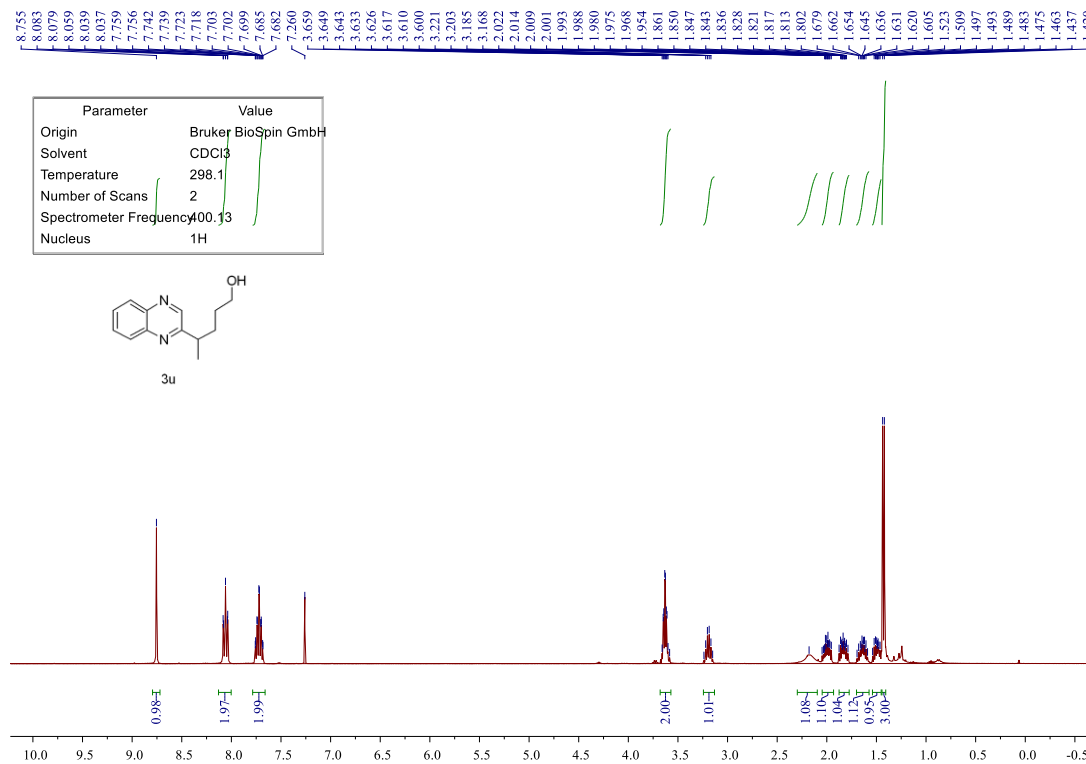

**Supplementary Figure 49. <sup>1</sup>H NMR (400 MHz, CDCl<sub>3</sub>) spectra for compound 3u.**

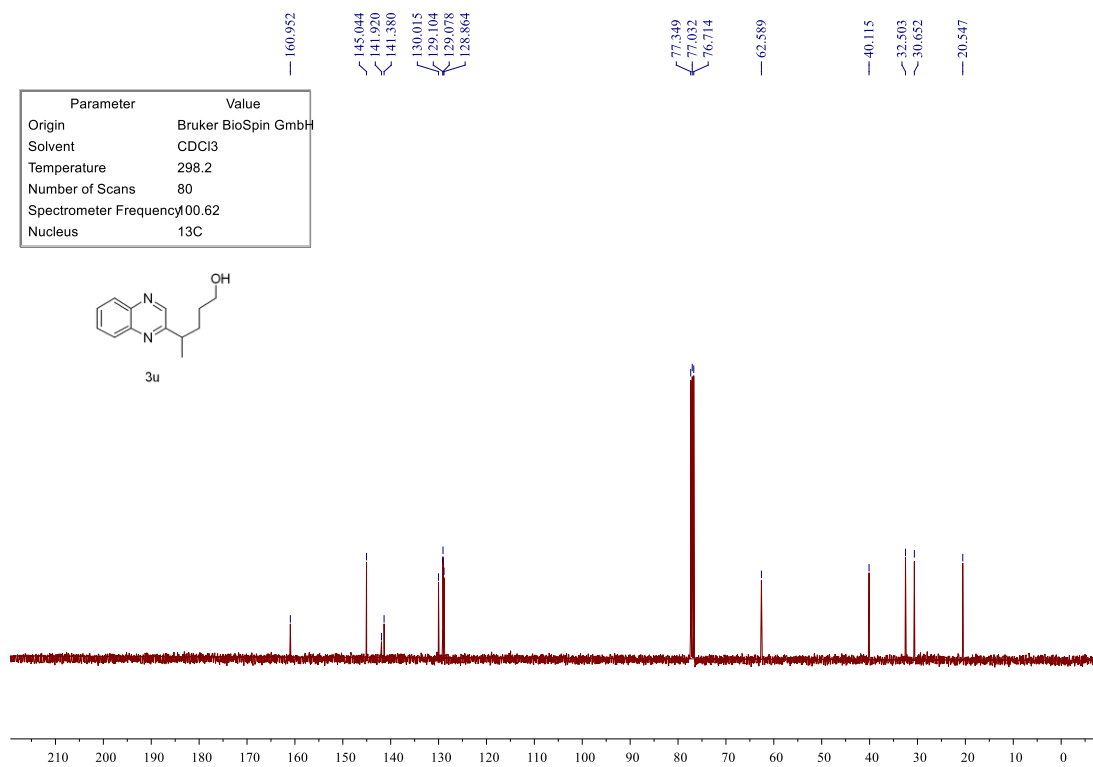

Supplementary Figure 50. <sup>13</sup>C NMR (100 MHz, CDCl<sub>3</sub>) spectra for compound 3u.

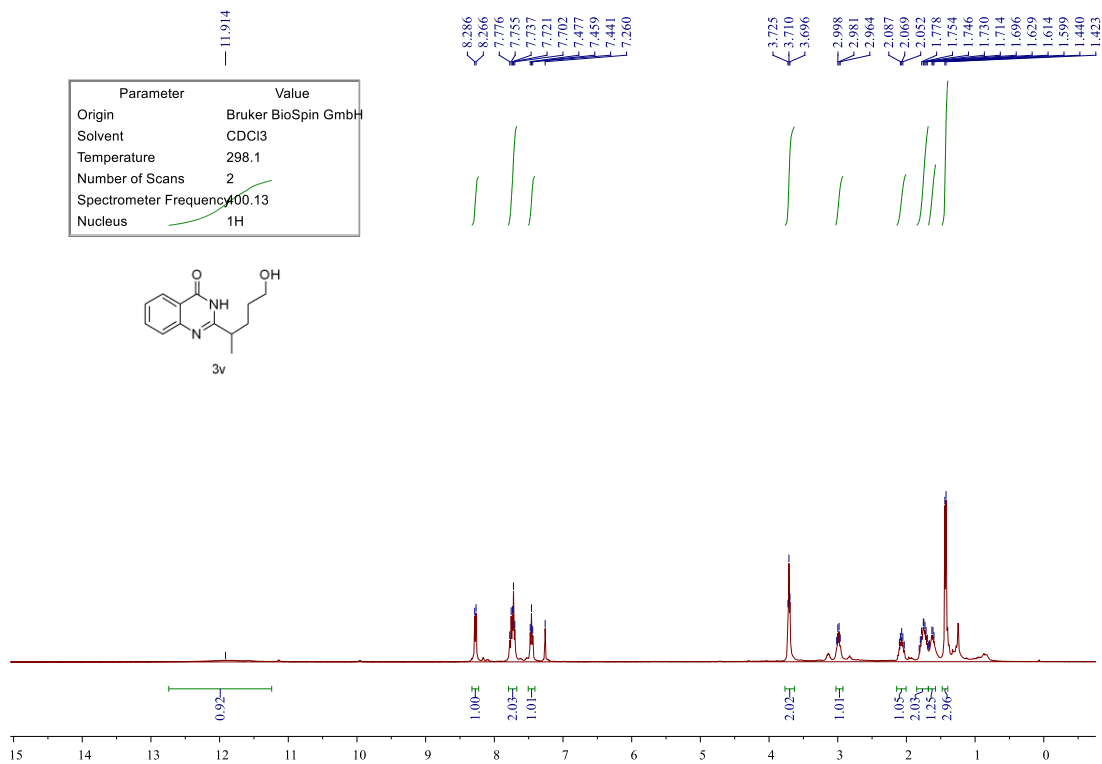

Supplementary Figure 51. <sup>1</sup>H NMR (400 MHz, CDCl<sub>3</sub>) spectra for compound 3v.

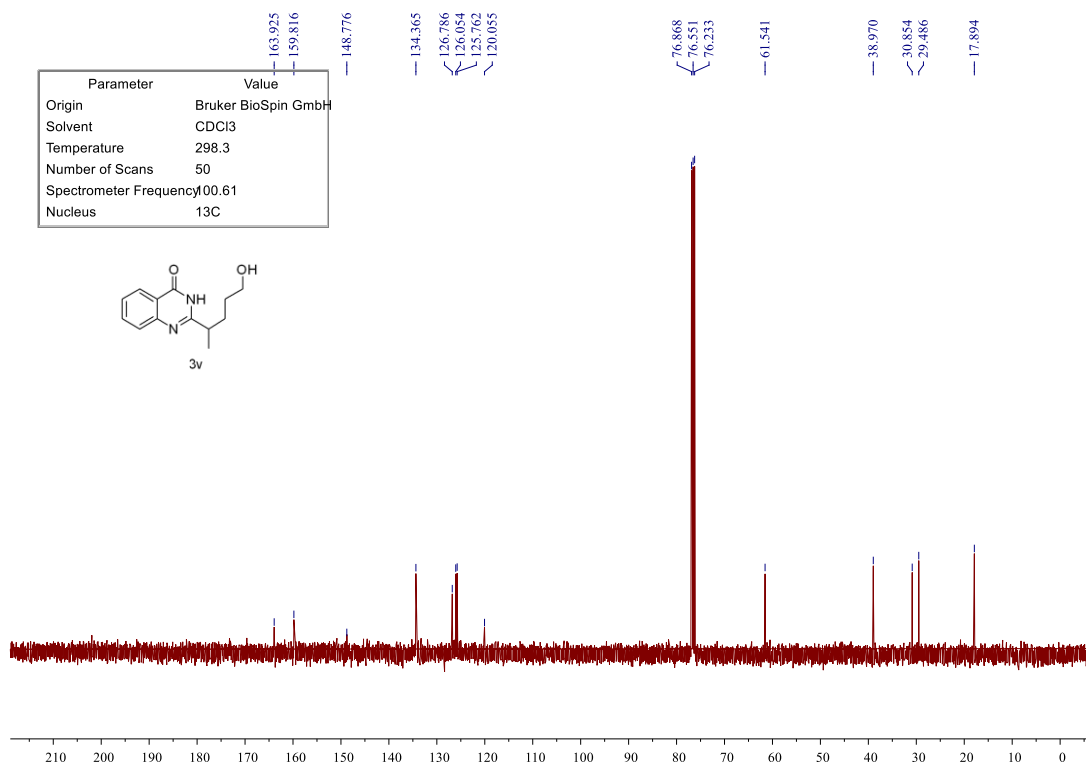

Supplementary Figure 52. <sup>13</sup>C NMR (100 MHz, CDCl<sub>3</sub>) spectra for compound 3v.

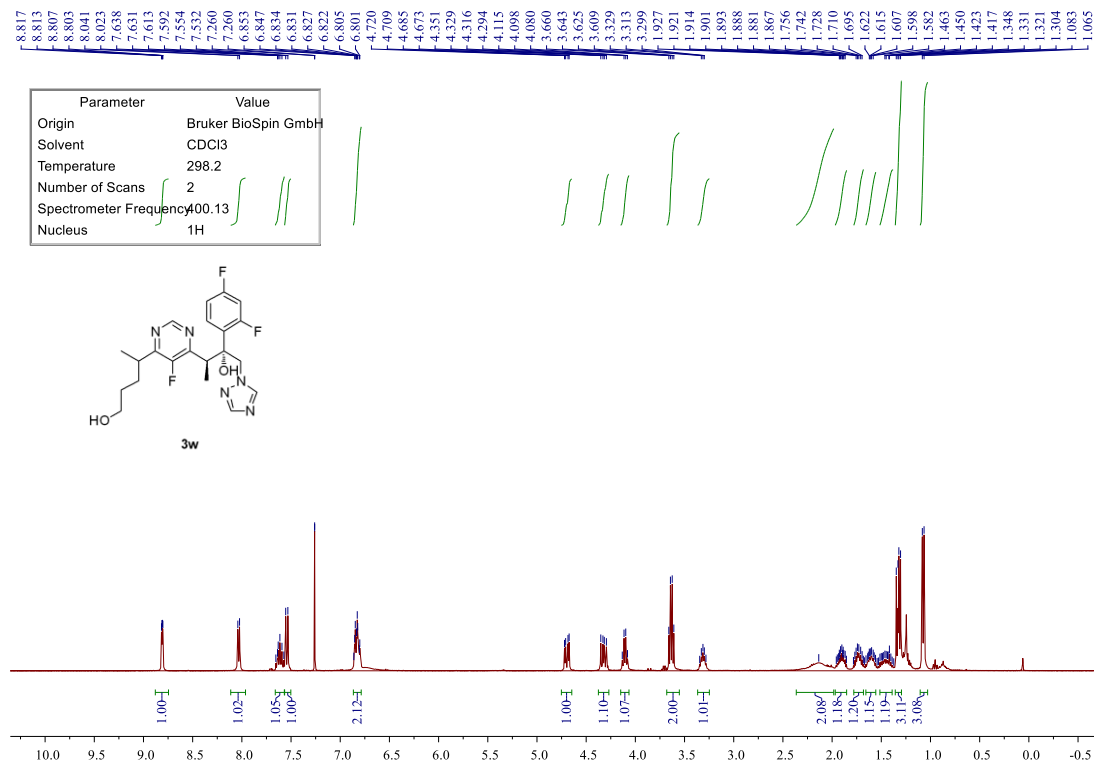

Supplementary Figure 53. <sup>1</sup>H NMR (400 MHz, CDCl<sub>3</sub>) spectra for compound 3w.

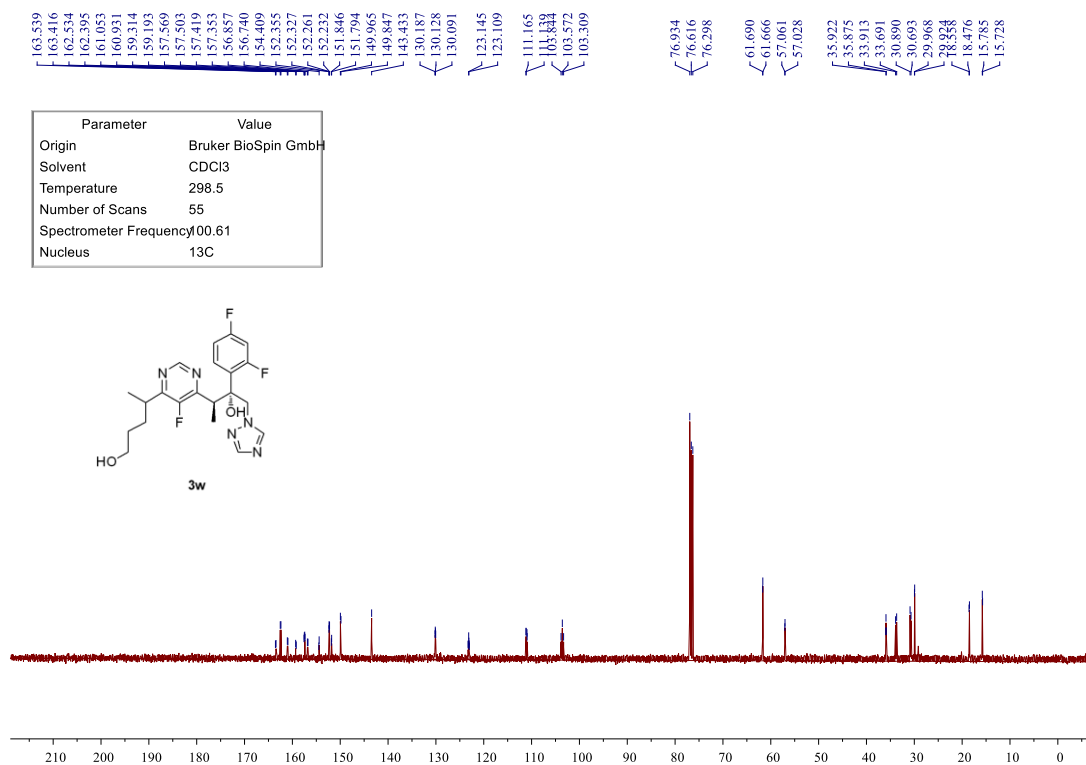

Supplementary Figure 54. <sup>13</sup>C NMR (100 MHz, CDCl<sub>3</sub>) spectra for compound **3w**.

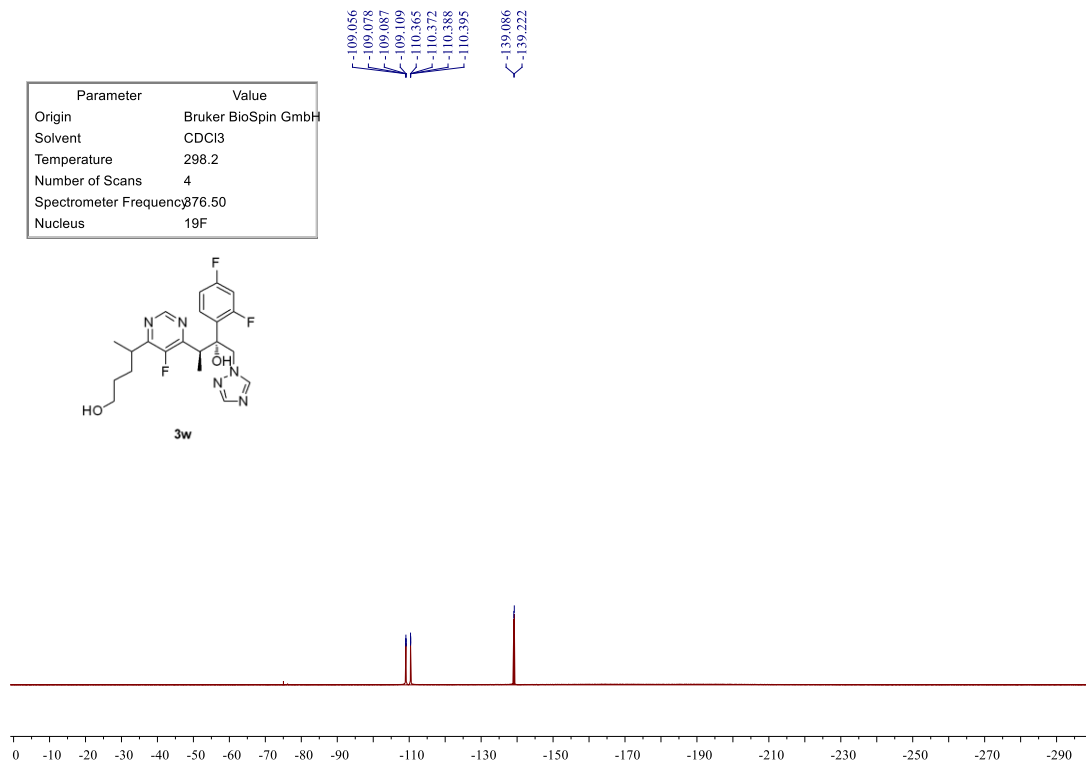

Supplementary Figure 55. <sup>19</sup>F NMR (376 MHz, CDCl<sub>3</sub>) spectra for compound **3w**.

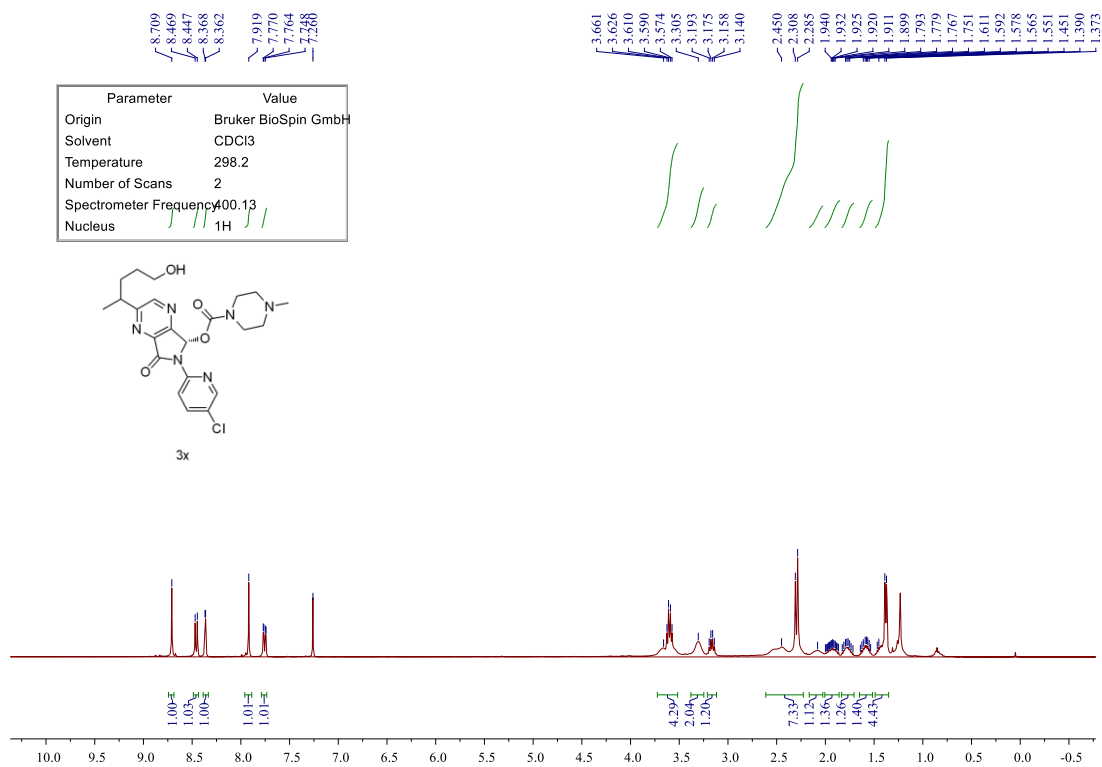

Supplementary Figure 56. <sup>1</sup>H NMR (400 MHz, CDCl<sub>3</sub>) spectra for compound 3x.

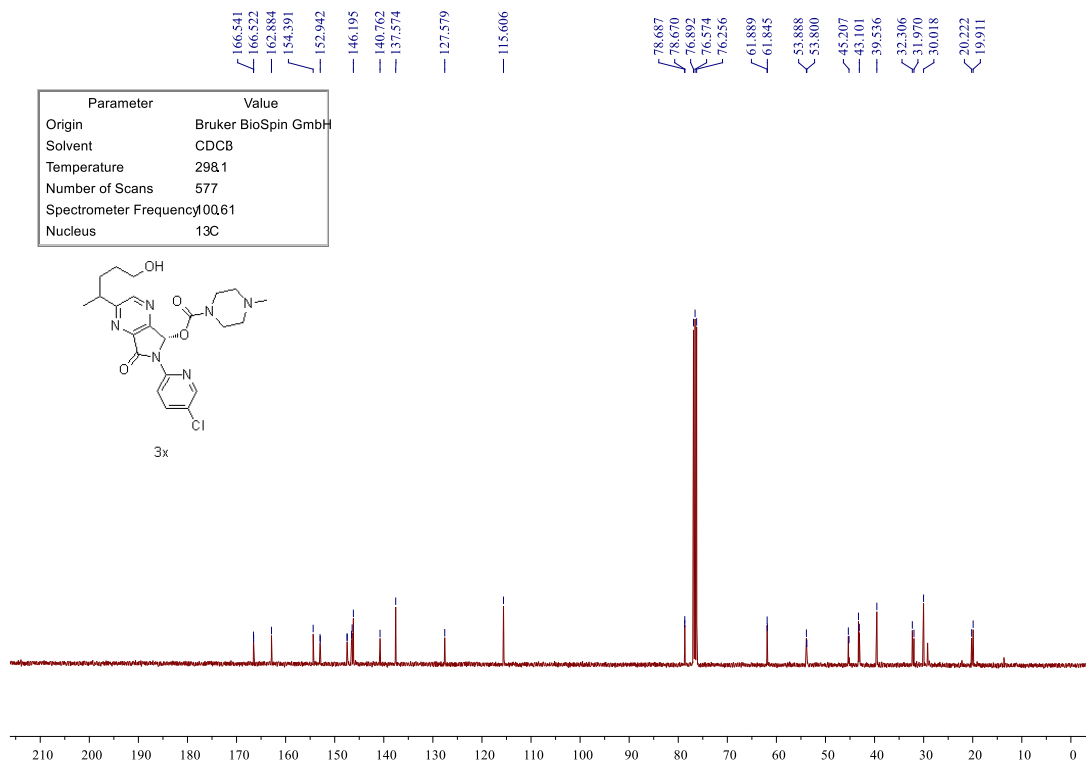

Supplementary Figure 57. <sup>13</sup>C NMR (100 MHz, CDCl<sub>3</sub>) spectra for compound 3x.



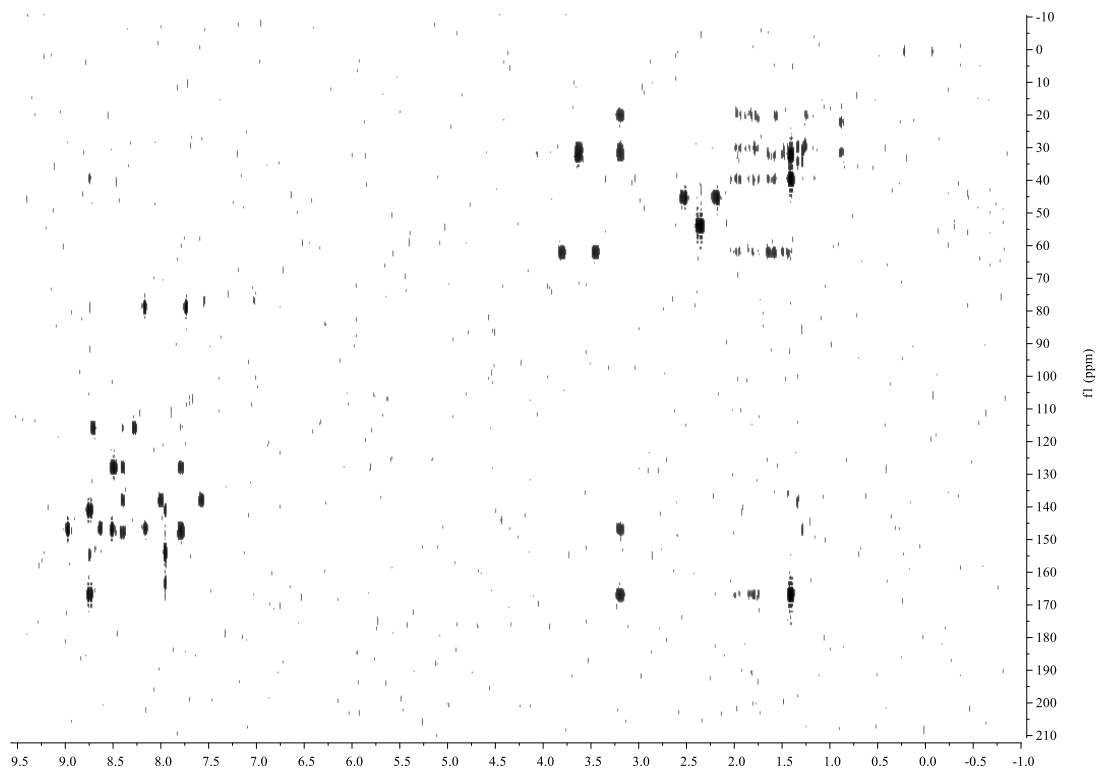

Supplementary Figure 58. HMBC spectra for compound 3x.

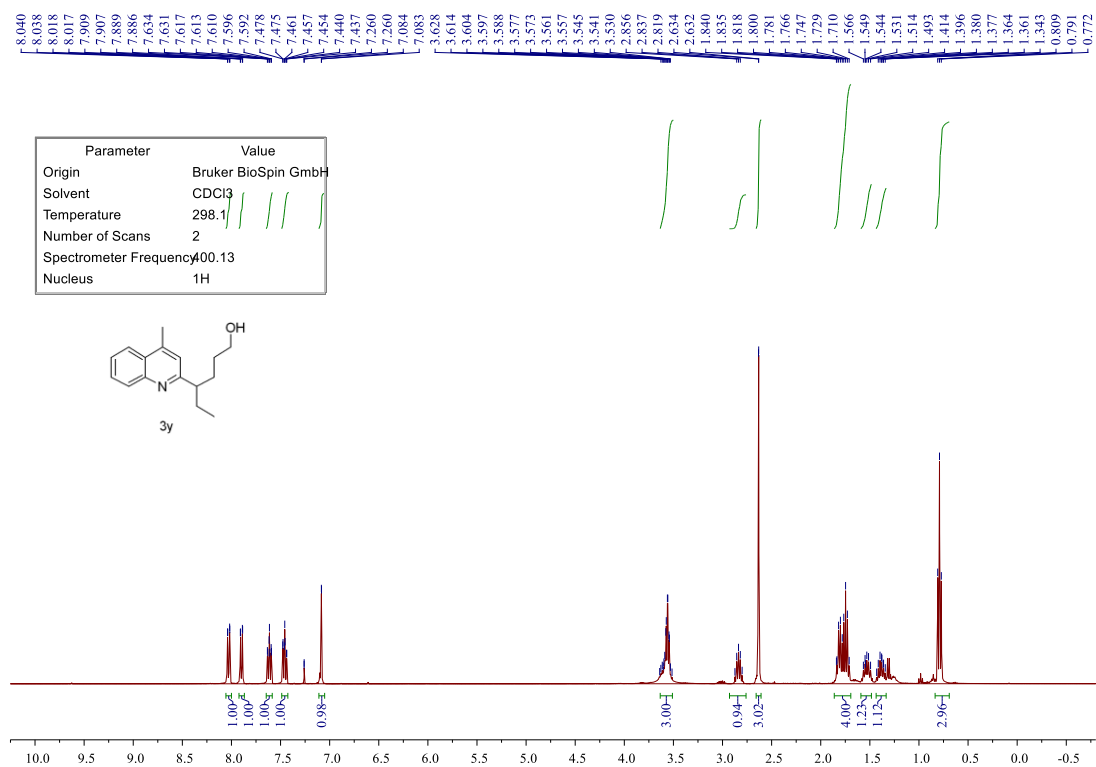

Supplementary Figure 59. <sup>1</sup>H NMR (400 MHz, CDCl<sub>3</sub>) spectra for compound 3y.

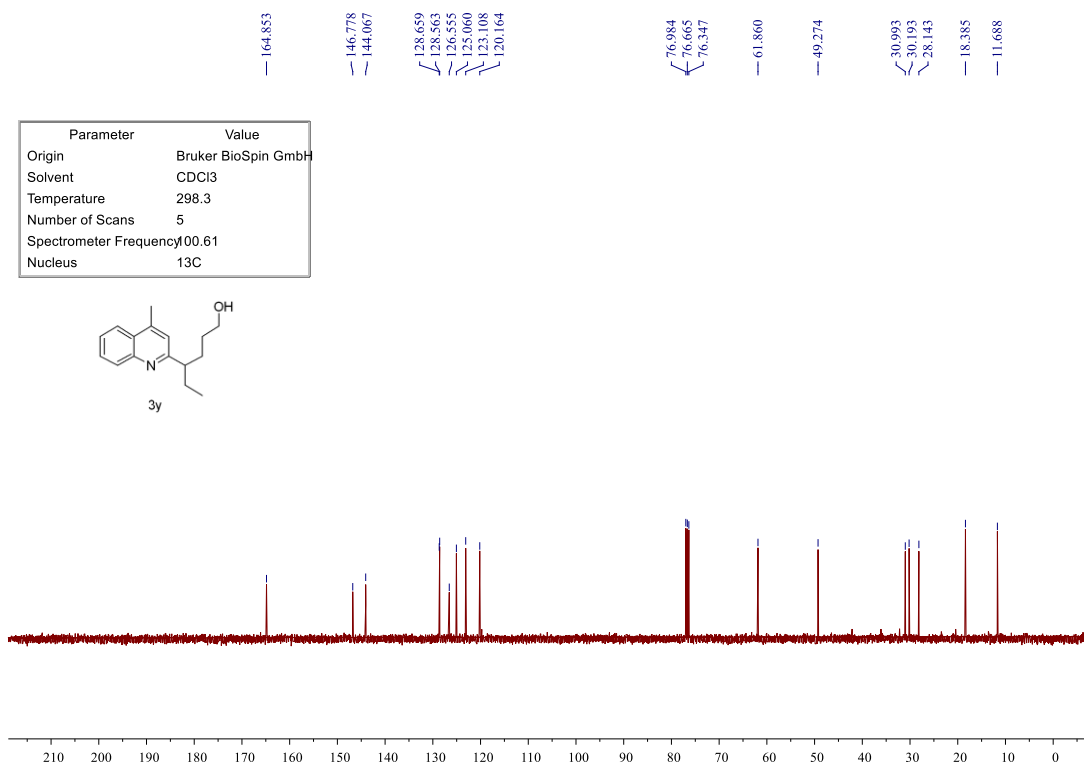

Supplementary Figure 60. <sup>13</sup>C NMR (100 MHz, CDCl<sub>3</sub>) spectra for compound **3y**.

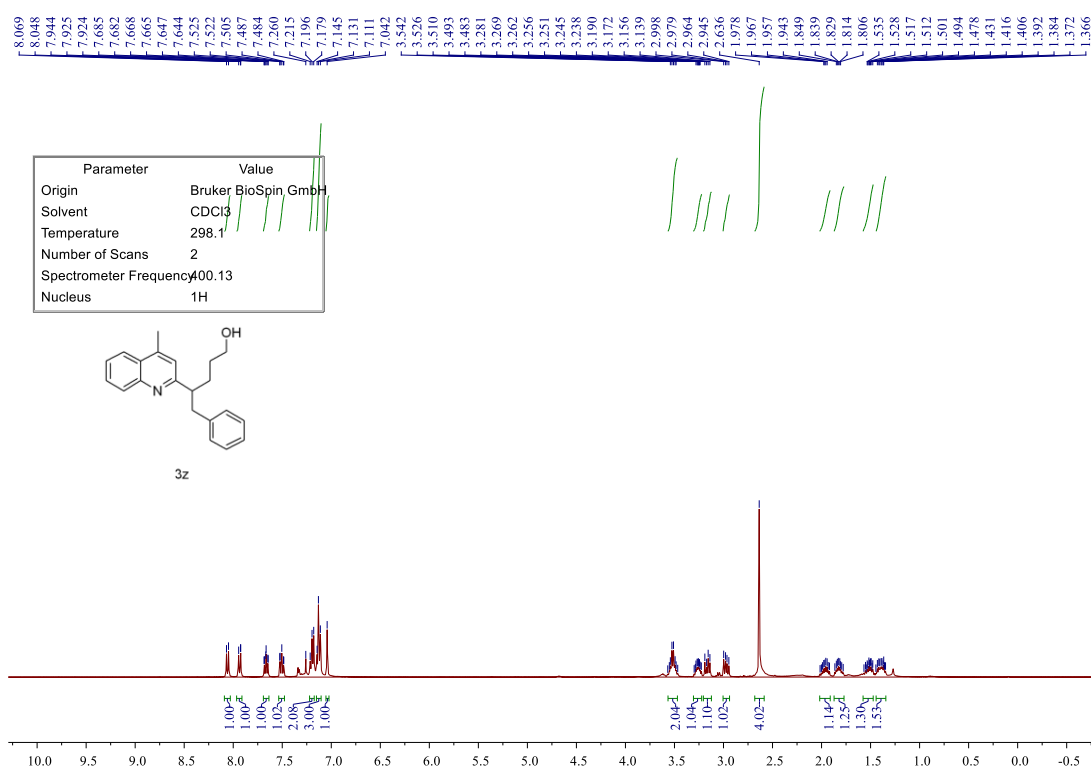

Supplementary Figure 61. <sup>1</sup>H NMR (400 MHz, CDCl<sub>3</sub>) spectra for compound **3z**.

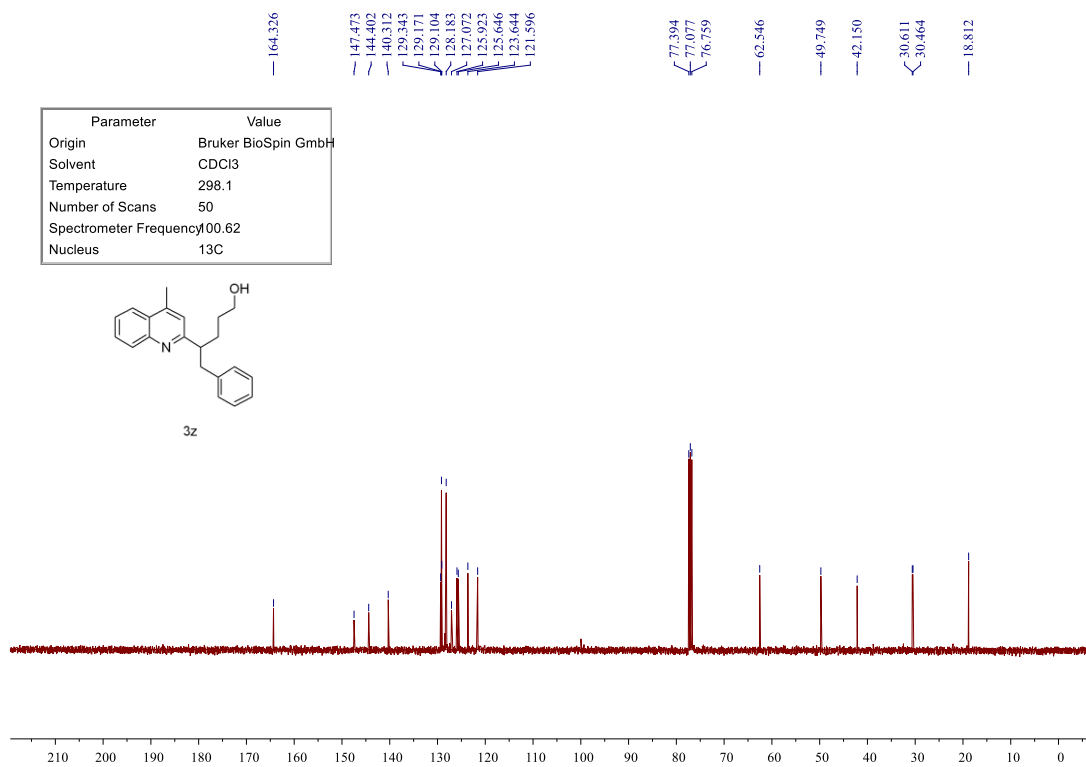

Supplementary Figure 62. <sup>13</sup>C NMR (100 MHz, CDCl<sub>3</sub>) spectra for compound 3z.

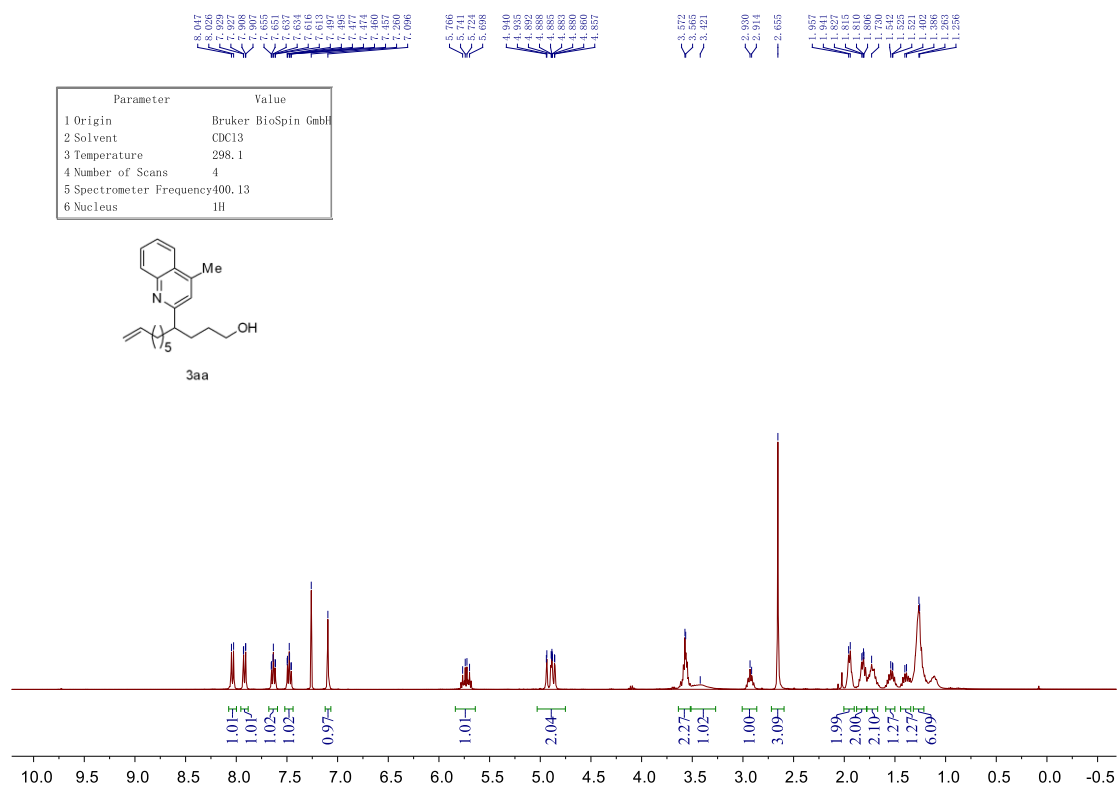

Supplementary Figure 63. <sup>1</sup>H NMR (400 MHz, CDCl<sub>3</sub>) spectra for compound 3aa.

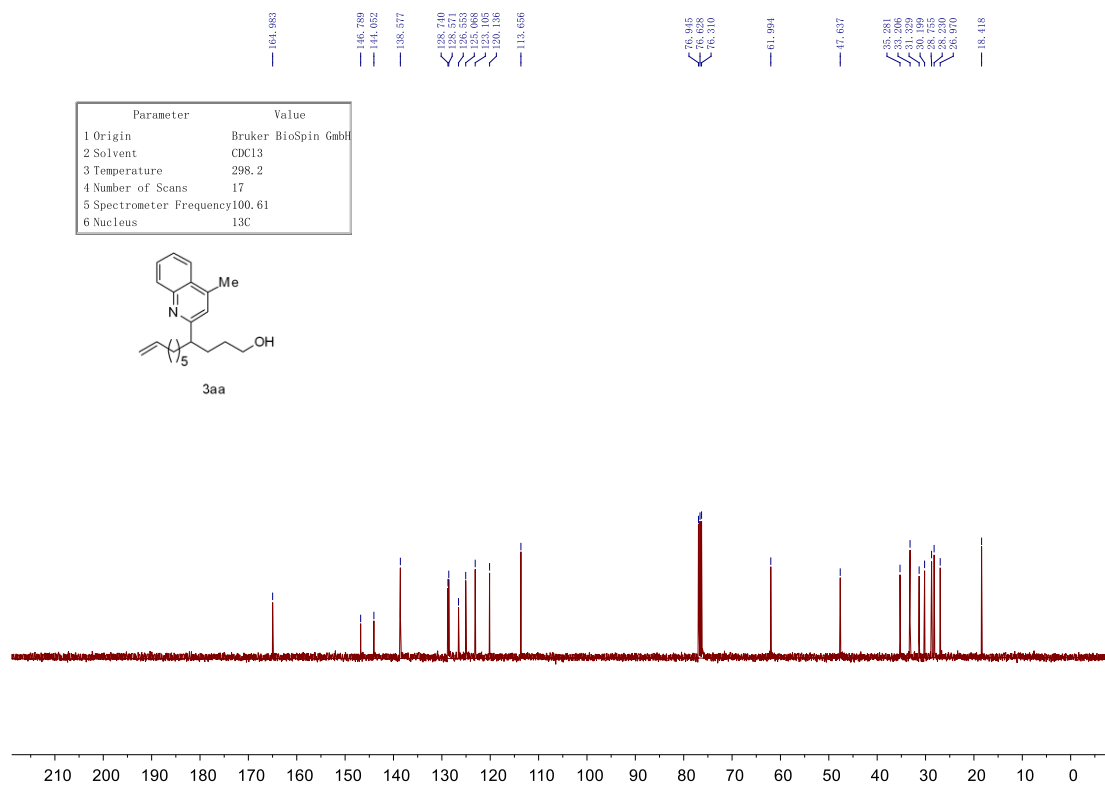

Supplementary Figure 64.  $^{13}\text{C}$  NMR (100 MHz,  $\text{CDCl}_3$ ) spectra for compound 3aa.

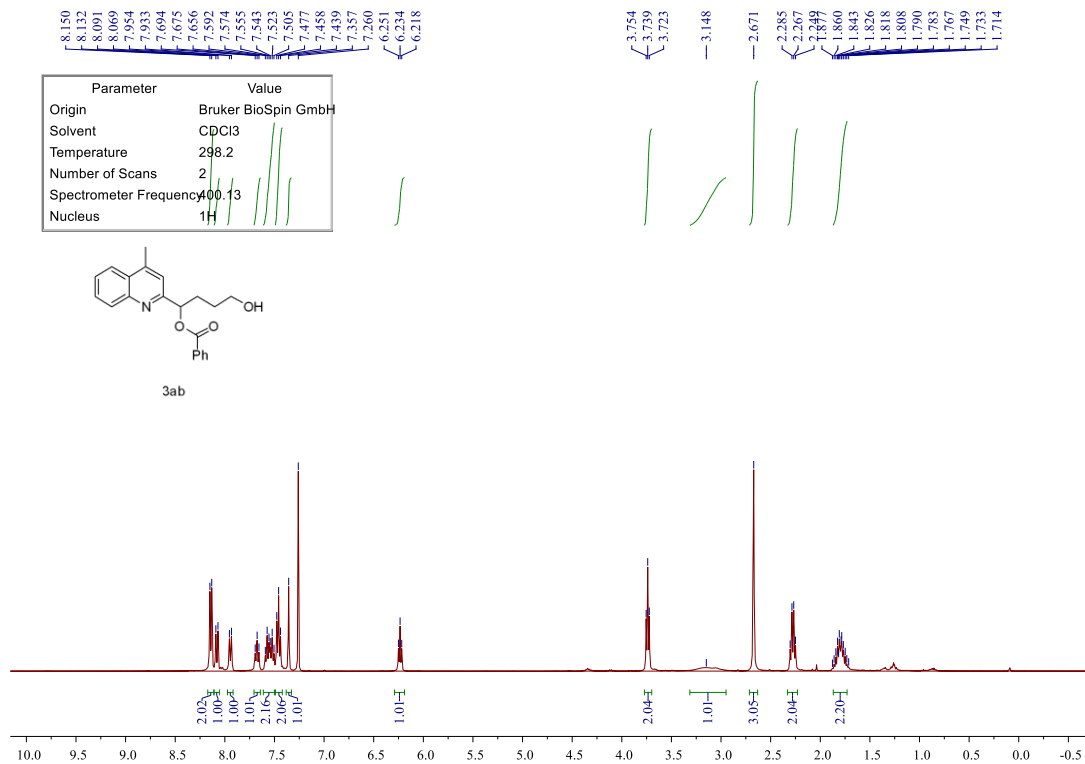

Supplementary Figure 65.  $^1\text{H}$  NMR (400 MHz,  $\text{CDCl}_3$ ) spectra for compound 3ab.

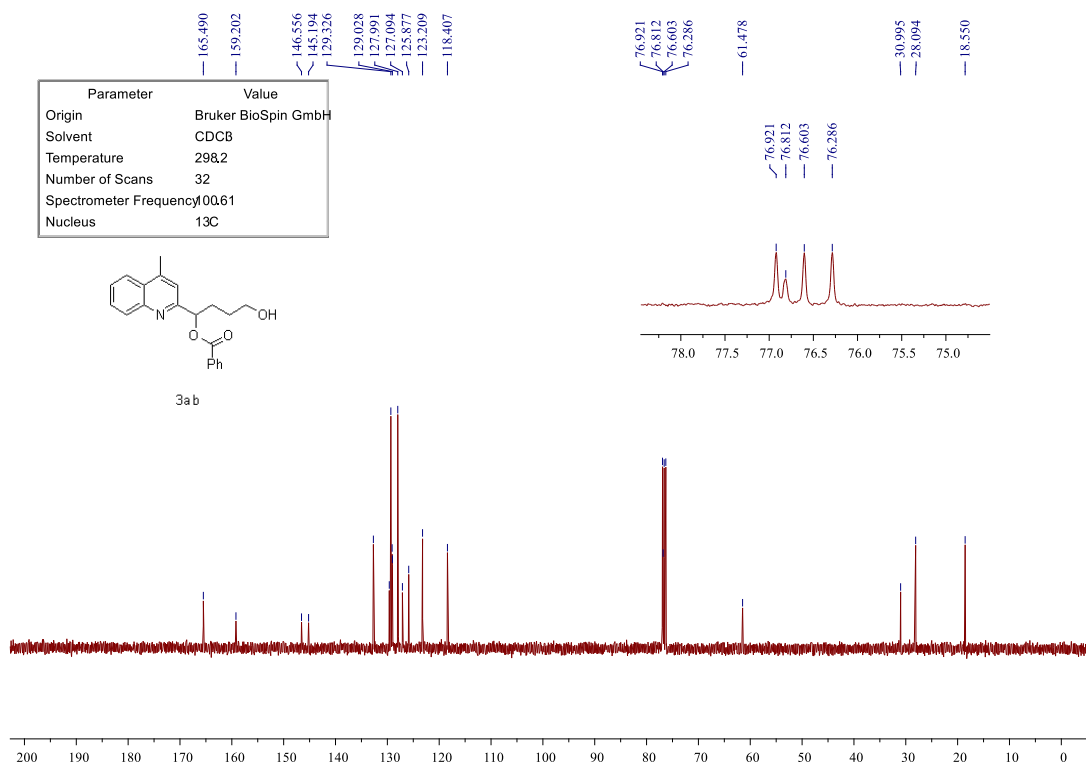

Supplementary Figure 66. <sup>13</sup>C NMR (100 MHz, CDCl<sub>3</sub>) spectra for compound 3ab.

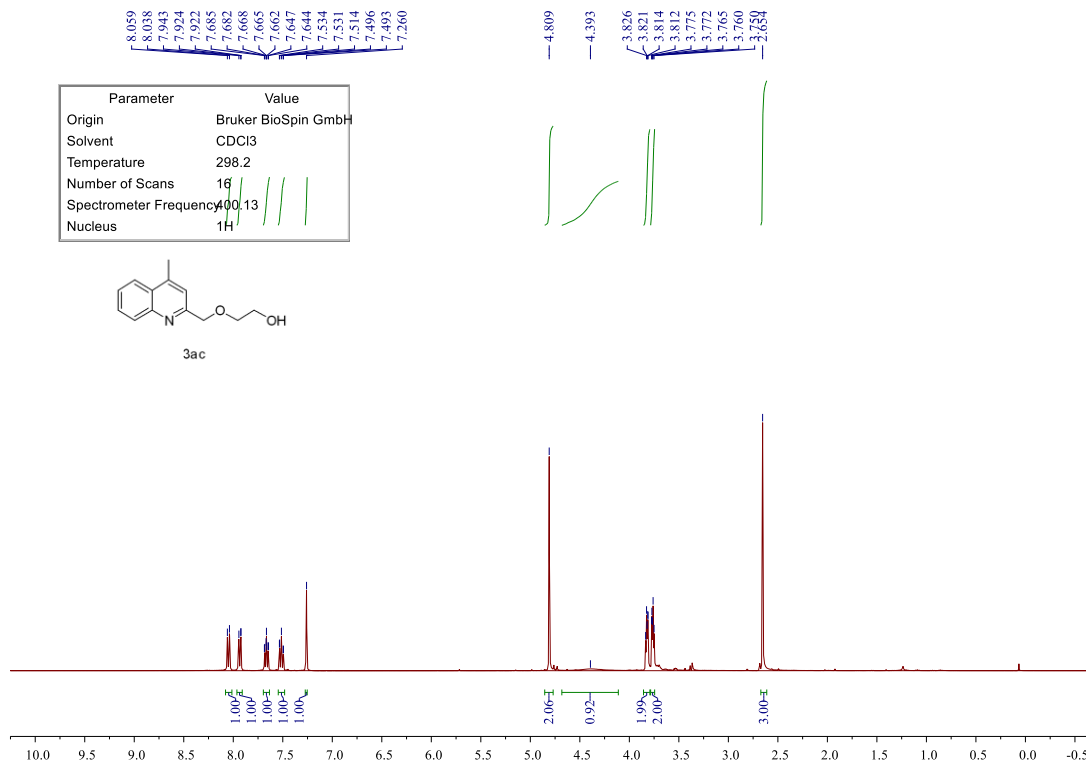

Supplementary Figure 67. <sup>1</sup>H NMR (400 MHz, CDCl<sub>3</sub>) spectra for compound 3ac.

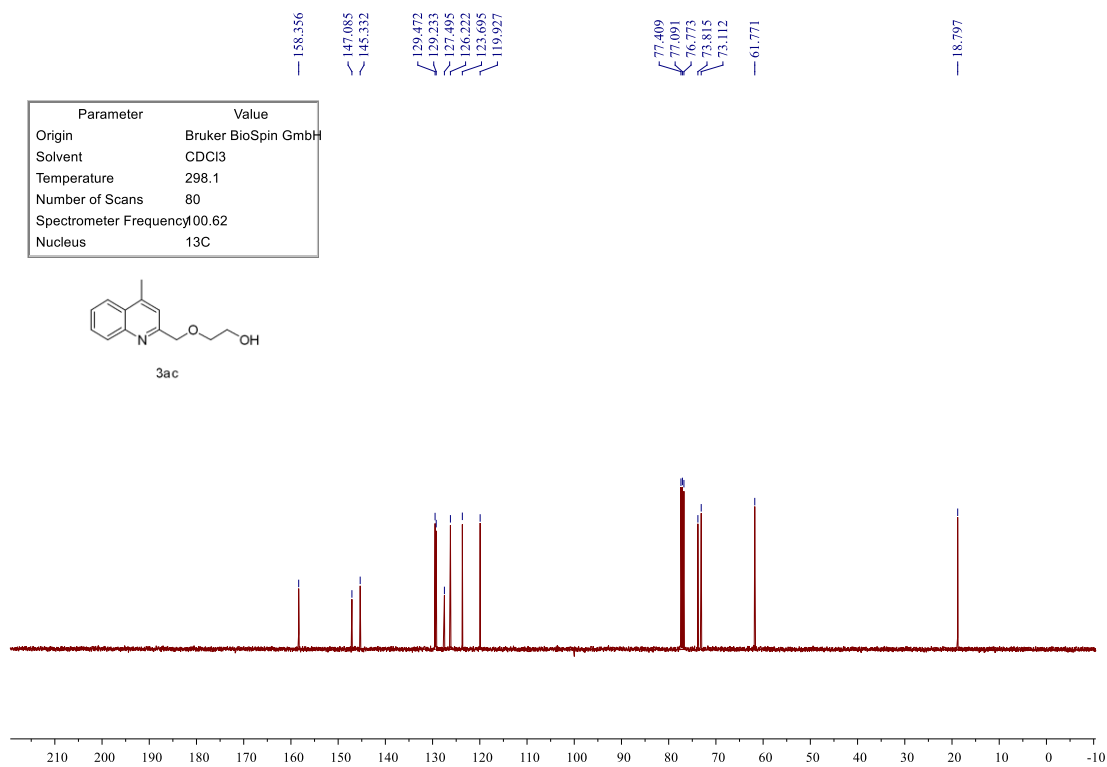

Supplementary Figure 68. <sup>13</sup>C NMR (100 MHz, CDCl<sub>3</sub>) spectra for compound 3ac.

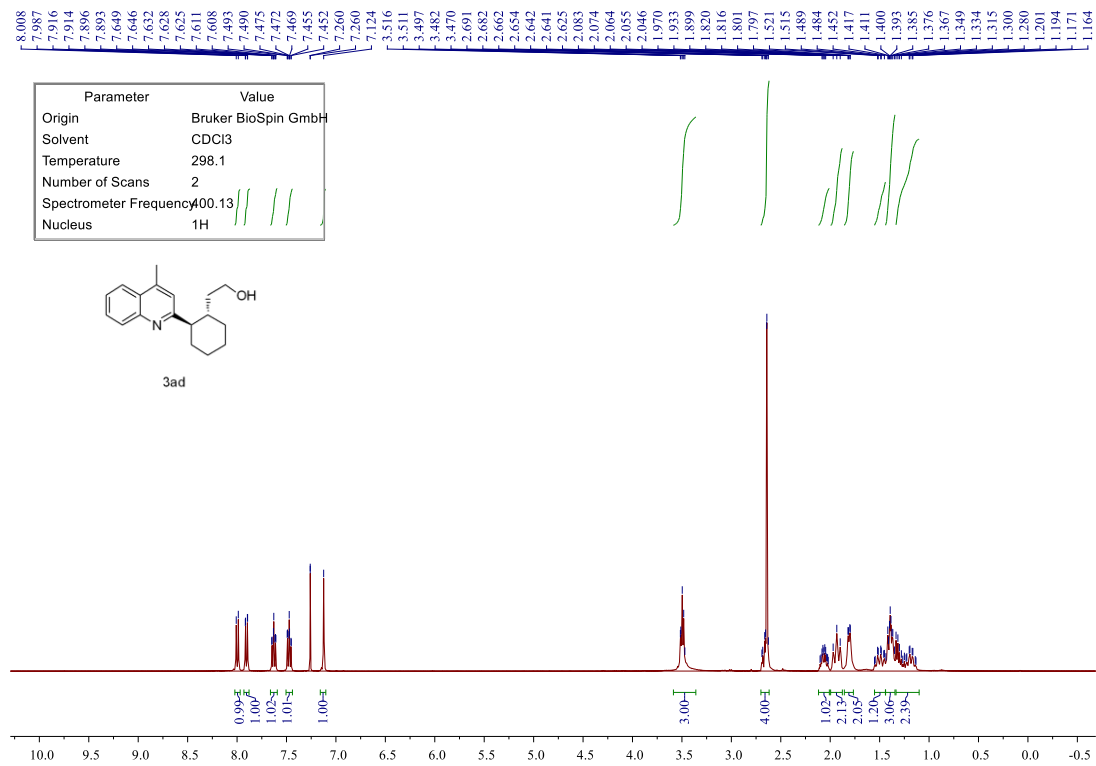

Supplementary Figure 69. <sup>1</sup>H NMR (400 MHz, CDCl<sub>3</sub>) spectra for compound 3ad.

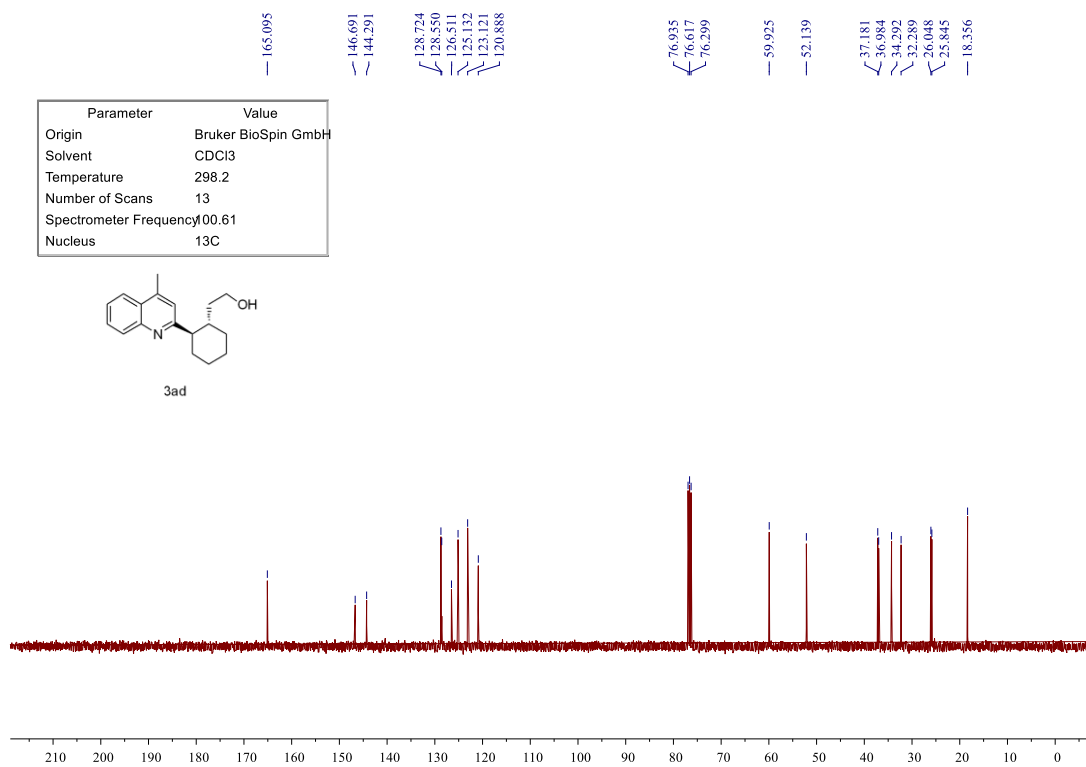

Supplementary Figure 70. <sup>13</sup>C NMR (100 MHz, CDCl<sub>3</sub>) spectra for compound 3ad.

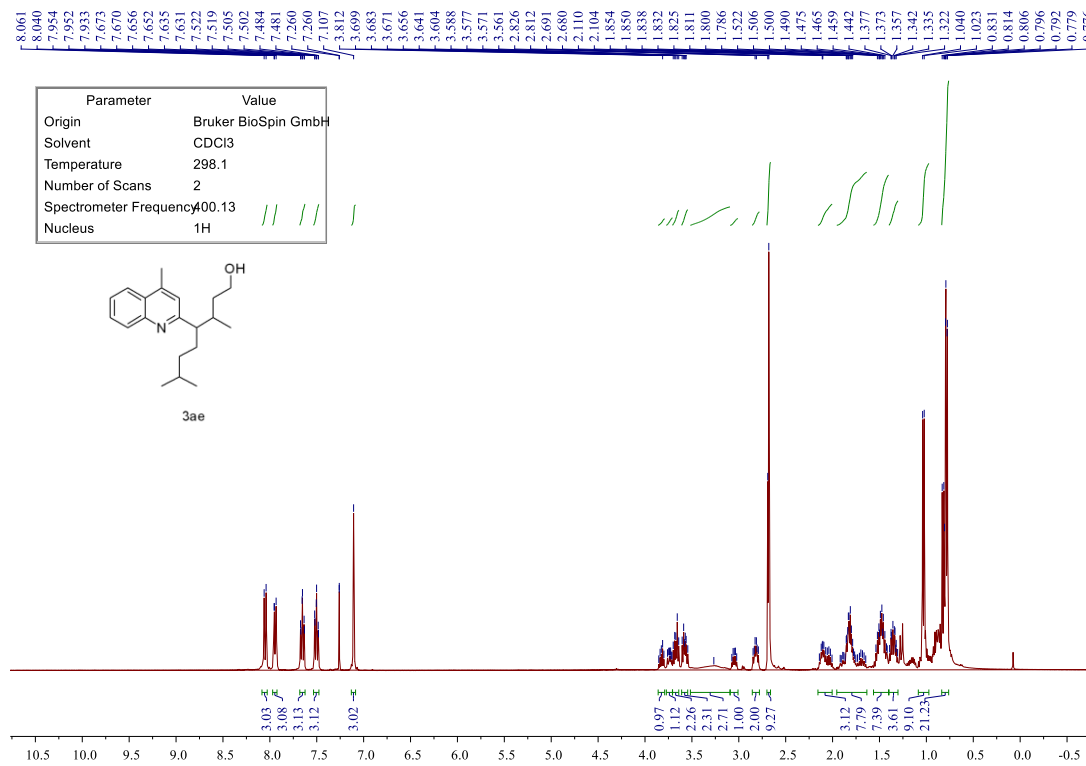

Supplementary Figure 71. <sup>1</sup>H NMR (400 MHz, CDCl<sub>3</sub>) spectra for compound 3ae.

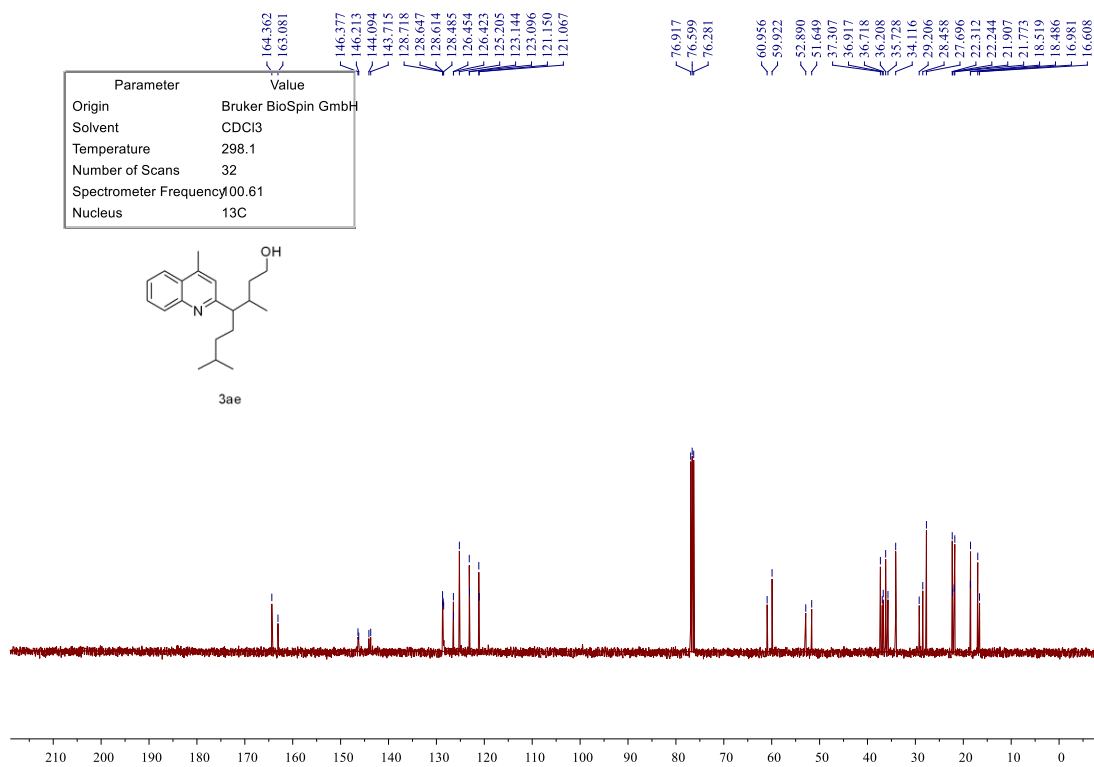

Supplementary Figure 72. <sup>13</sup>C NMR (100 MHz, CDCl<sub>3</sub>) spectra for compound 3ae.

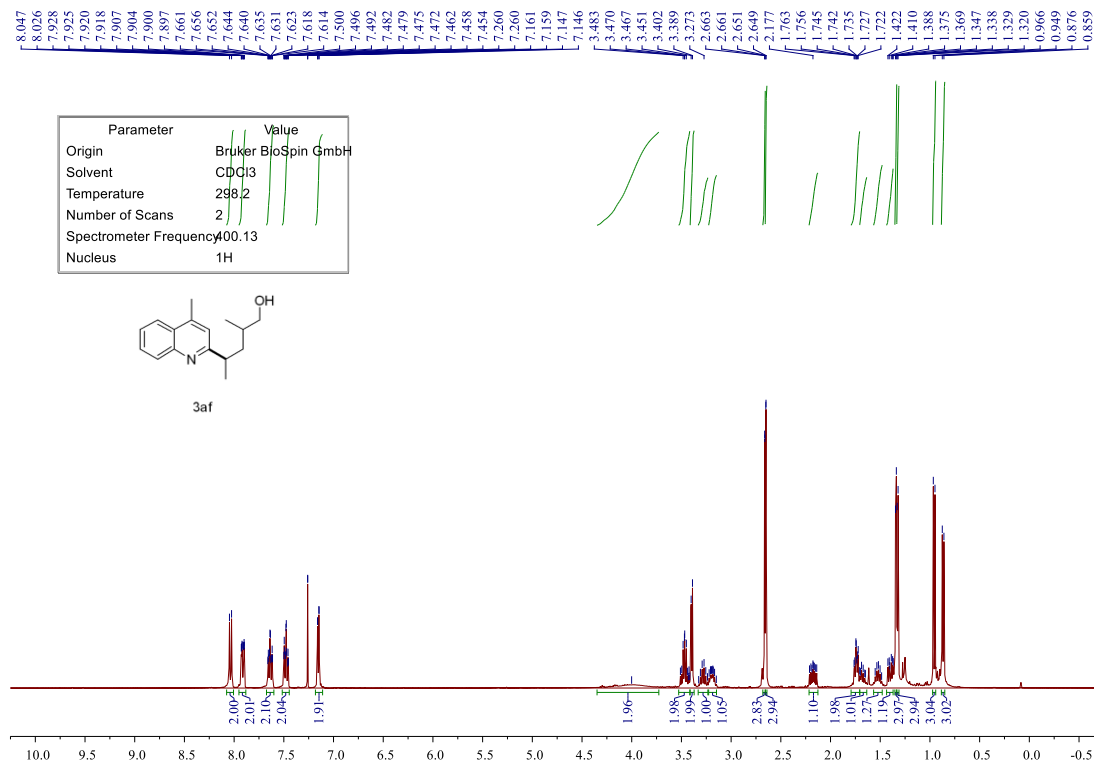

Supplementary Figure 73. <sup>1</sup>H NMR (400 MHz, CDCl<sub>3</sub>) spectra for compound 3af.



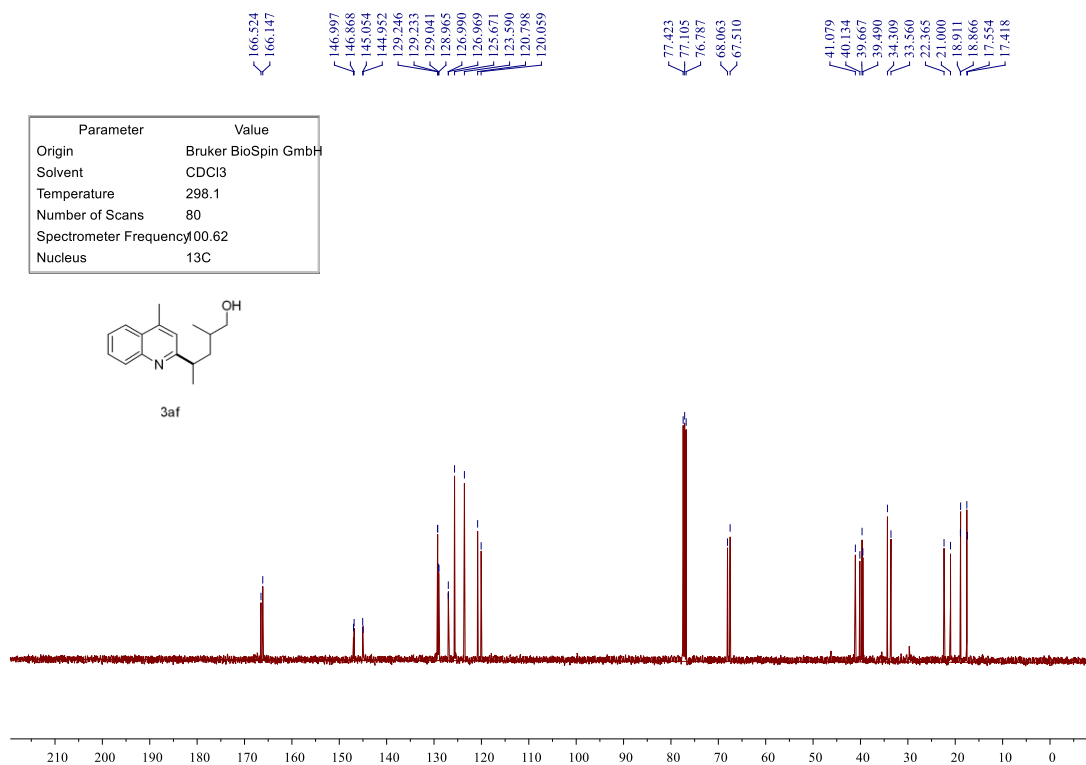

Supplementary Figure 74. <sup>13</sup>C NMR (100 MHz, CDCl<sub>3</sub>) spectra for compound 3af.

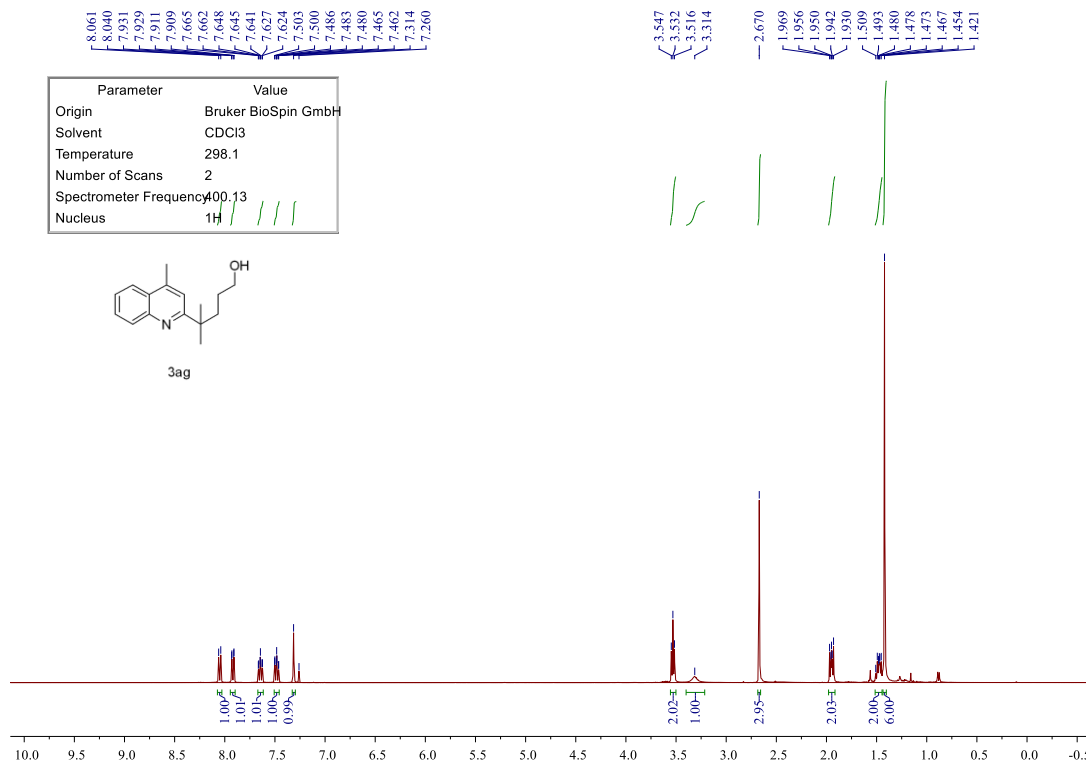

Supplementary Figure 75. <sup>1</sup>H NMR (400 MHz, CDCl<sub>3</sub>) spectra for compound 3ag.

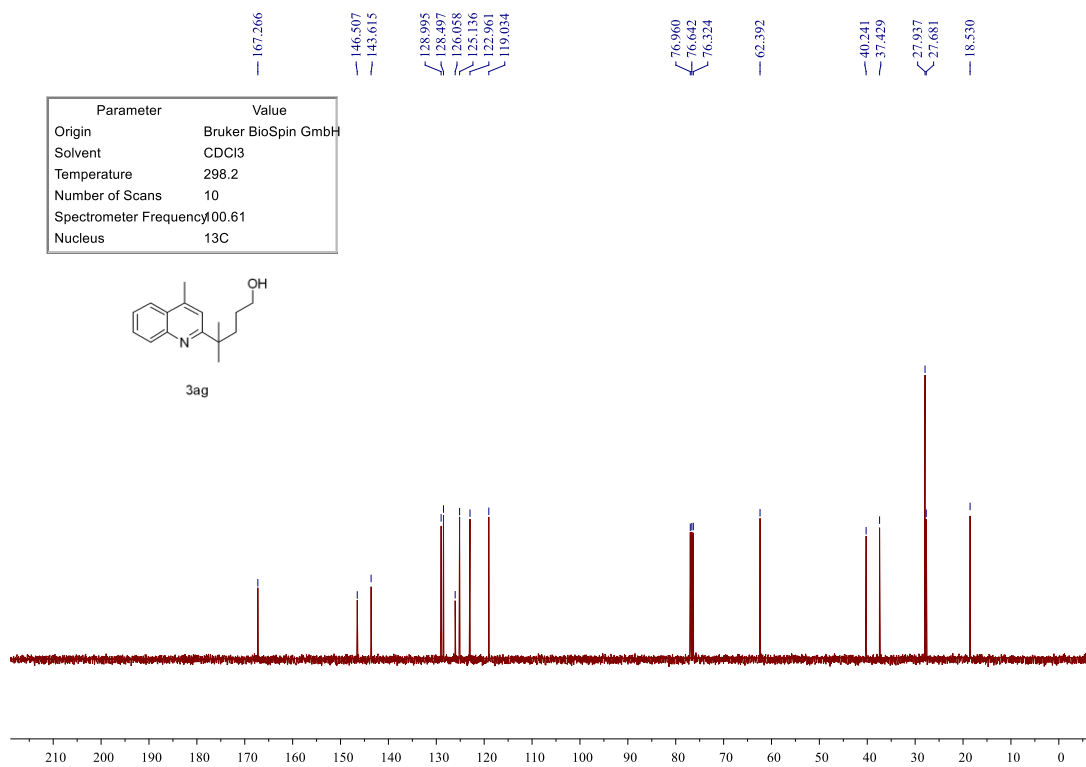

Supplementary Figure 76. <sup>13</sup>C NMR (100 MHz, CDCl<sub>3</sub>) spectra for compound 3ag.

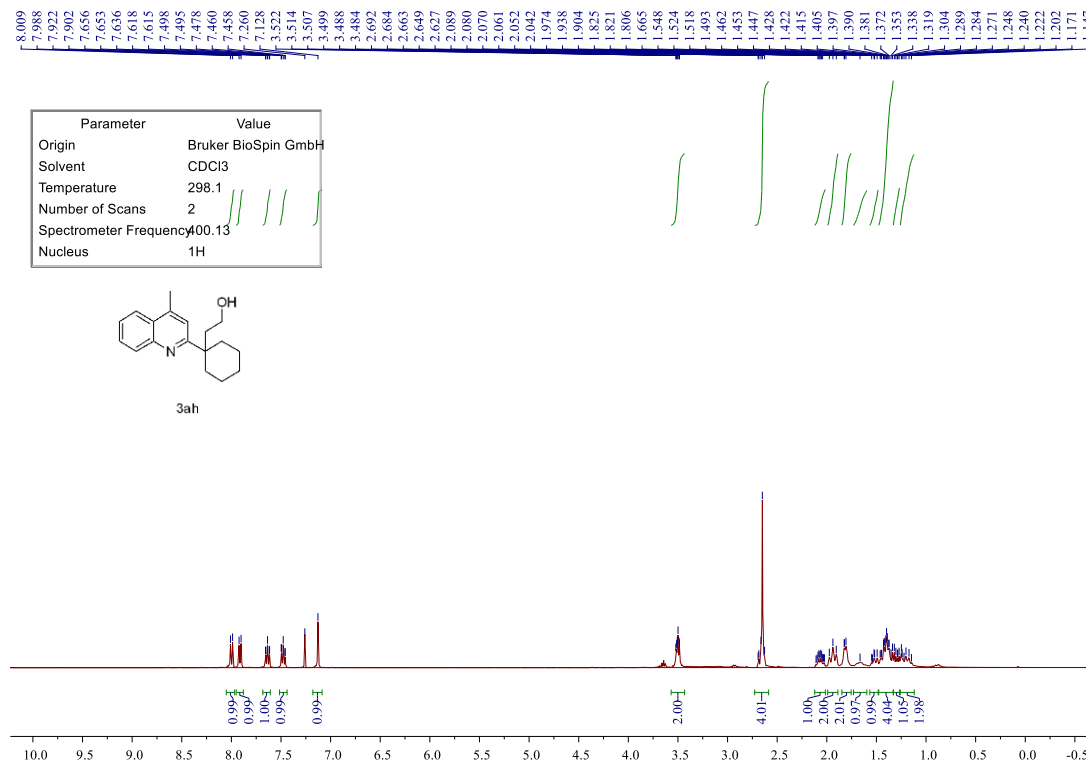

Supplementary Figure 77. <sup>1</sup>H NMR (400 MHz, CDCl<sub>3</sub>) spectra for compound 3ah.

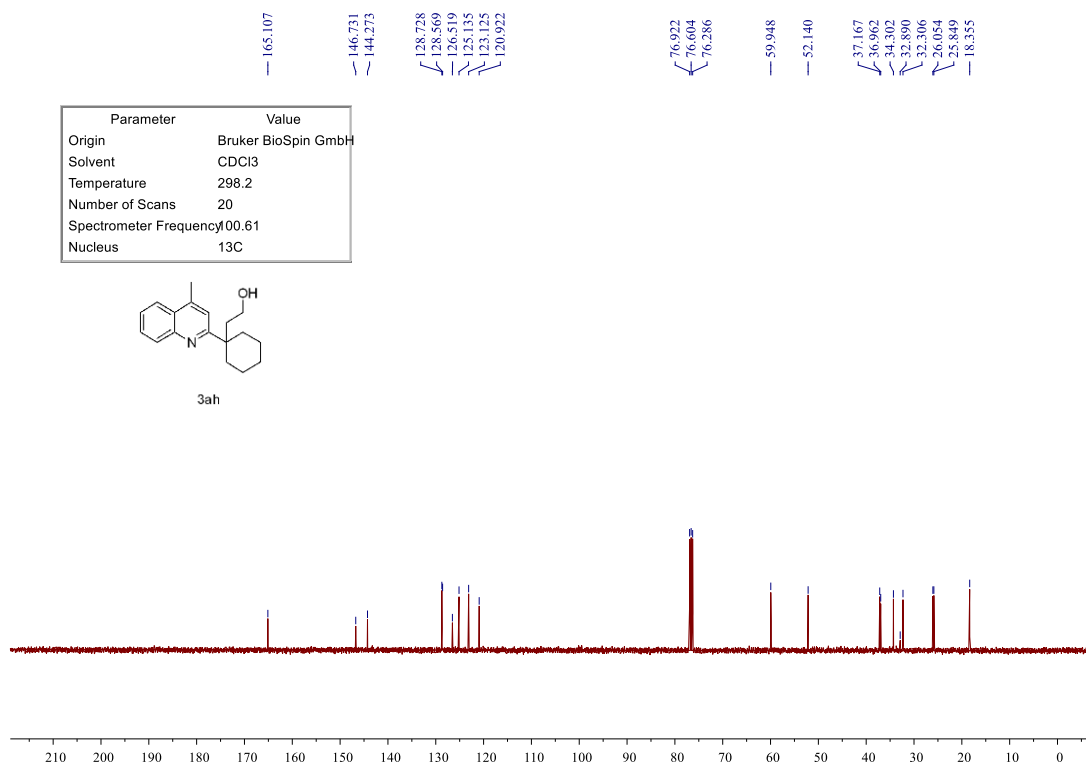

Supplementary Figure 78. <sup>13</sup>C NMR (100 MHz, CDCl<sub>3</sub>) spectra for compound 3ah.

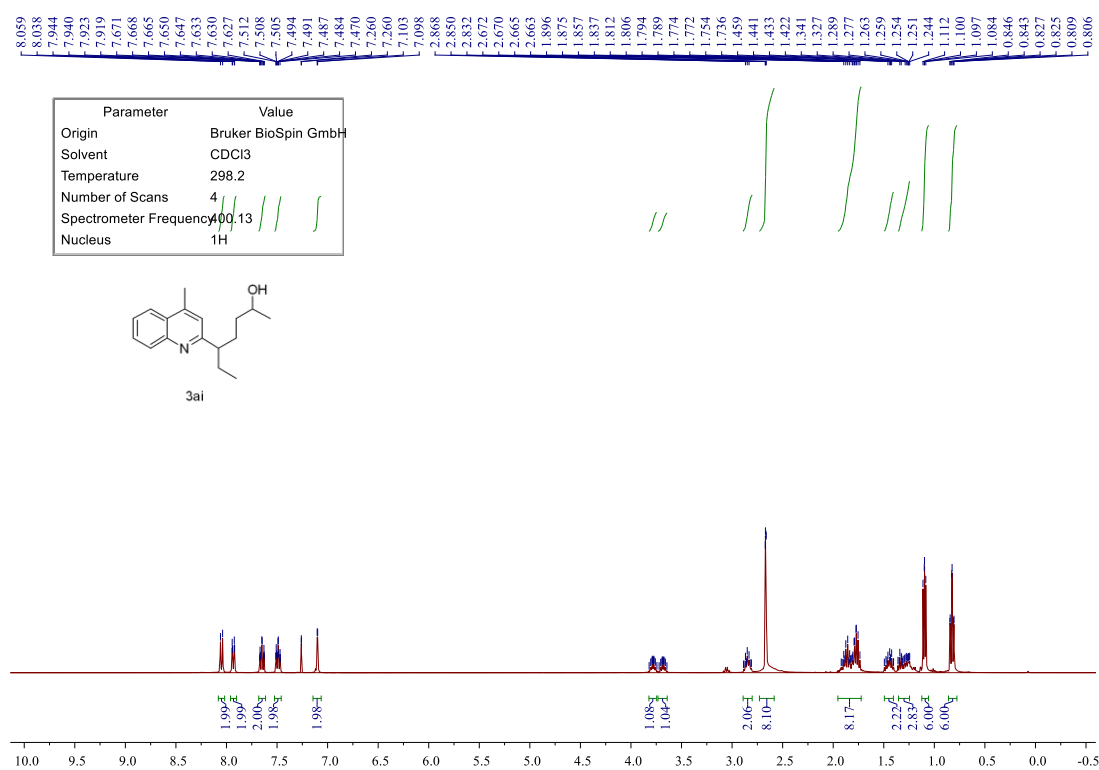

Supplementary Figure 79. <sup>1</sup>H NMR (400 MHz, CDCl<sub>3</sub>) spectra for compound 3ai.

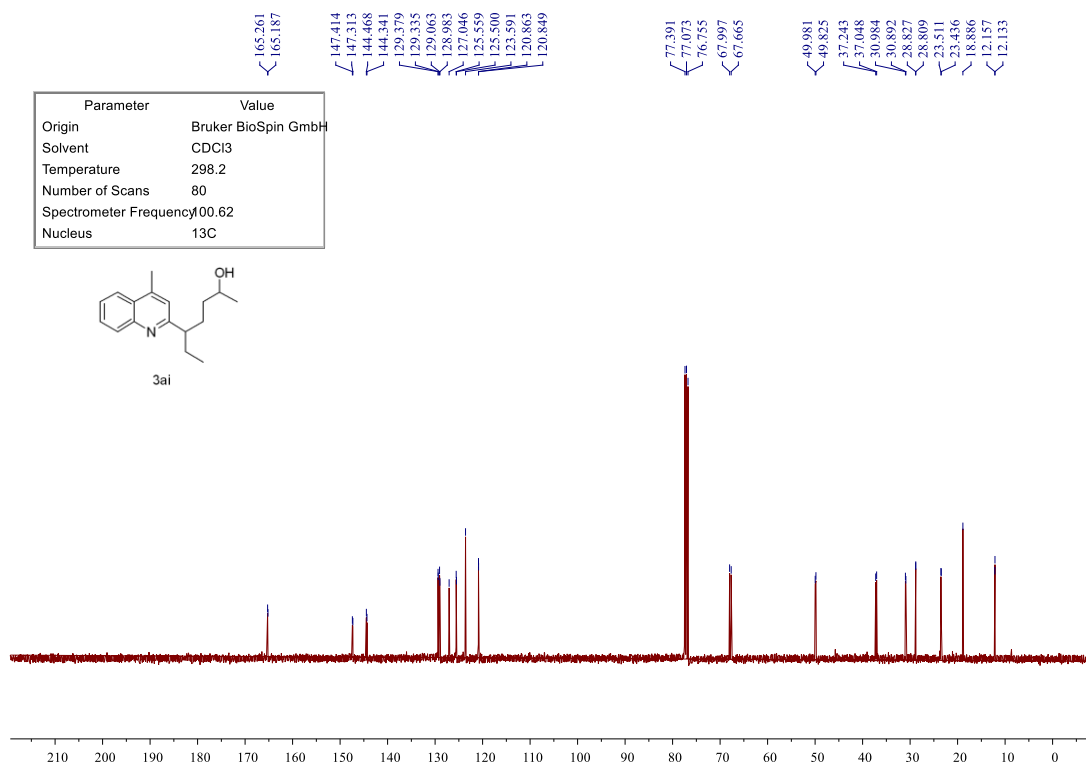

Supplementary Figure 80. <sup>13</sup>C NMR (100 MHz, CDCl<sub>3</sub>) spectra for compound 3ai.

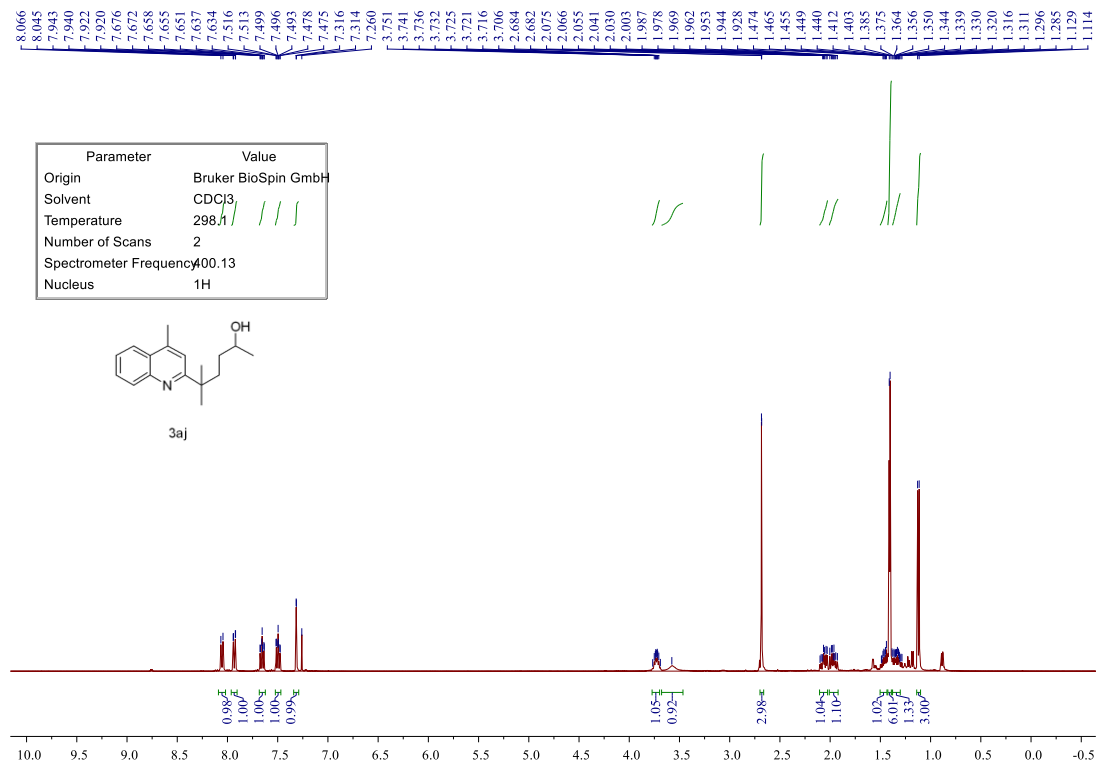

Supplementary Figure 81. <sup>1</sup>H NMR (400 MHz, CDCl<sub>3</sub>) spectra for compound 3aj.

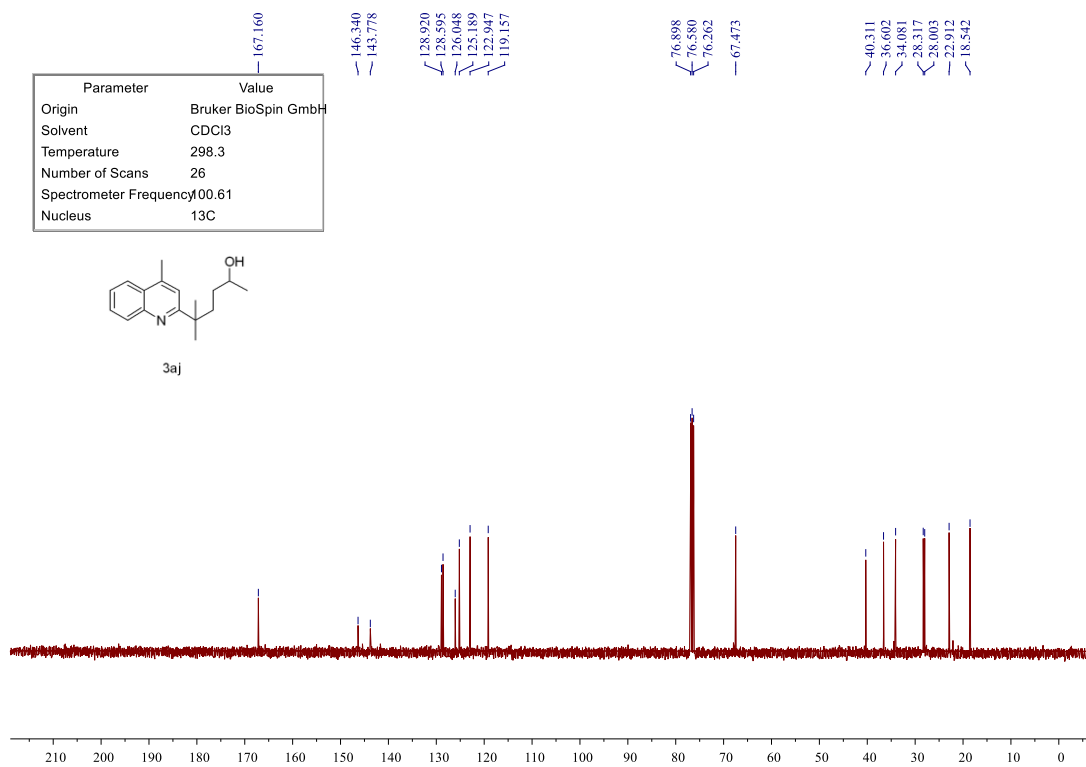

Supplementary Figure 82. <sup>13</sup>C NMR (100 MHz, CDCl<sub>3</sub>) spectra for compound 3aj.

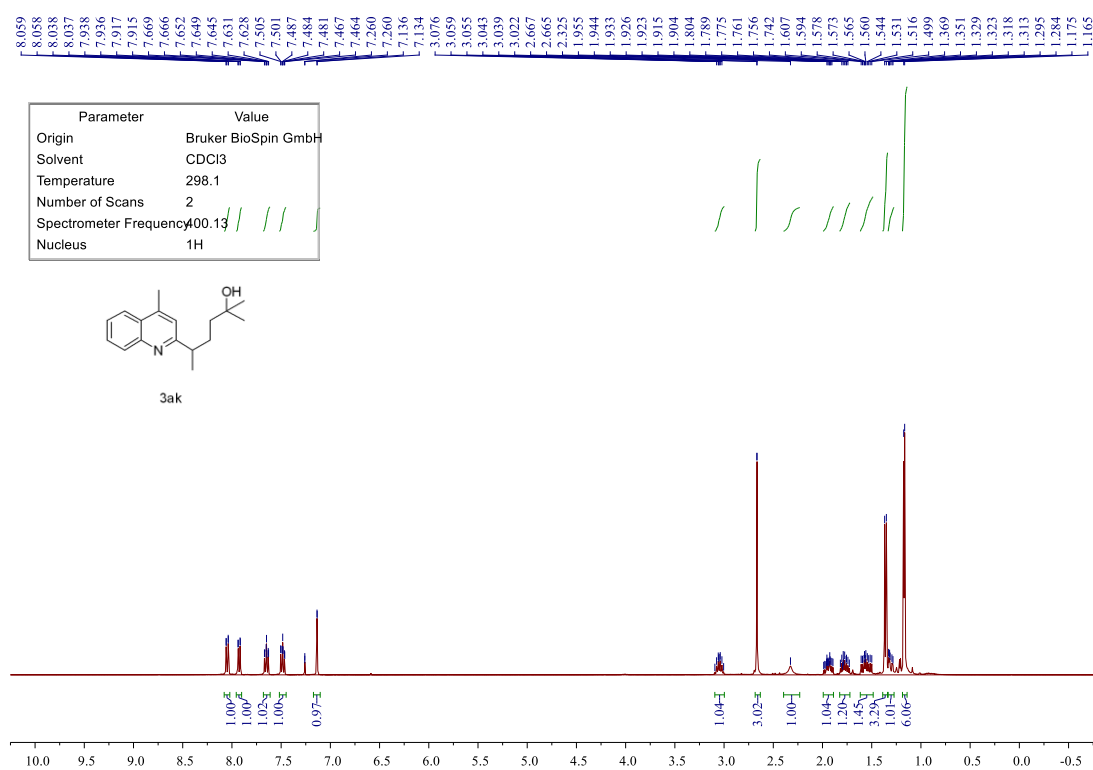

Supplementary Figure 83. <sup>1</sup>H NMR (400 MHz, CDCl<sub>3</sub>) spectra for compound 3ak.

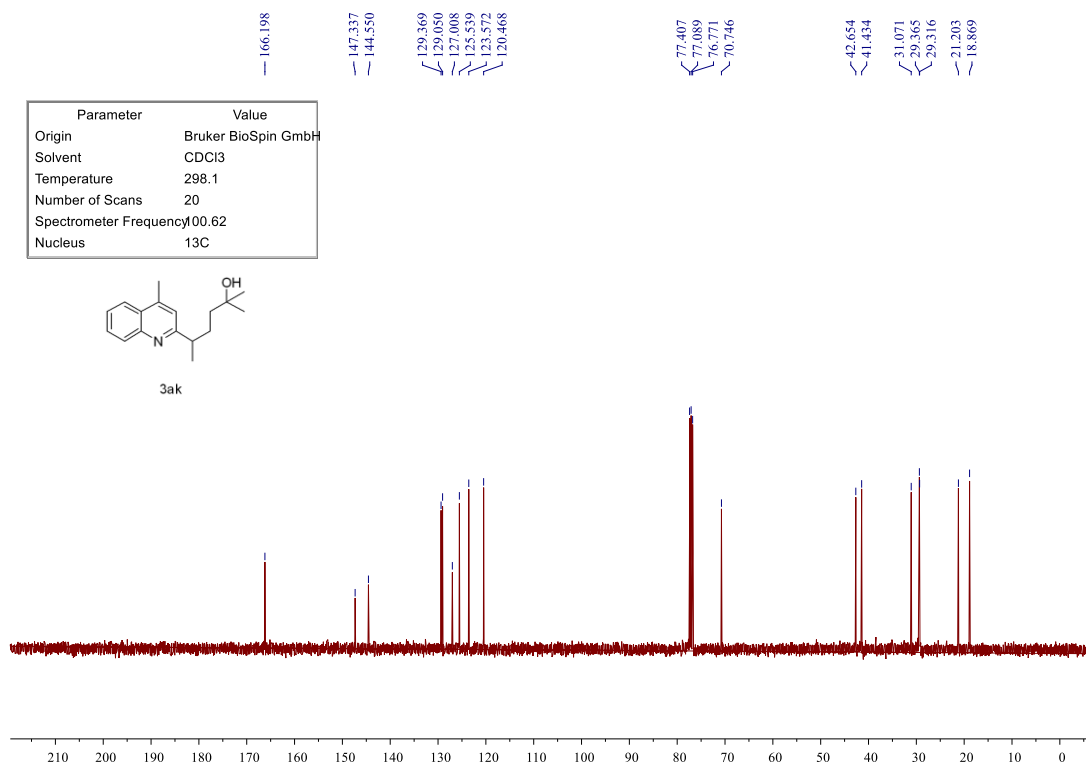

Supplementary Figure 84. <sup>13</sup>C NMR (100 MHz, CDCl<sub>3</sub>) spectra for compound 3ak.

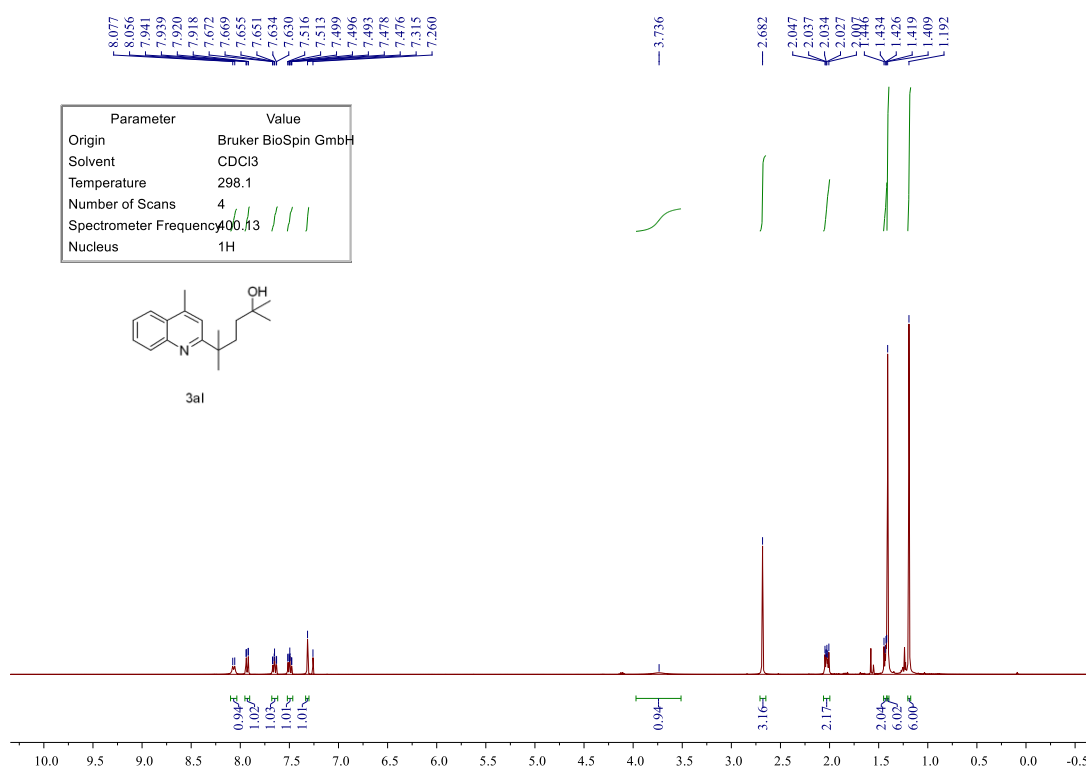

Supplementary Figure 85. <sup>1</sup>H NMR (400 MHz, CDCl<sub>3</sub>) spectra for compound 3al.

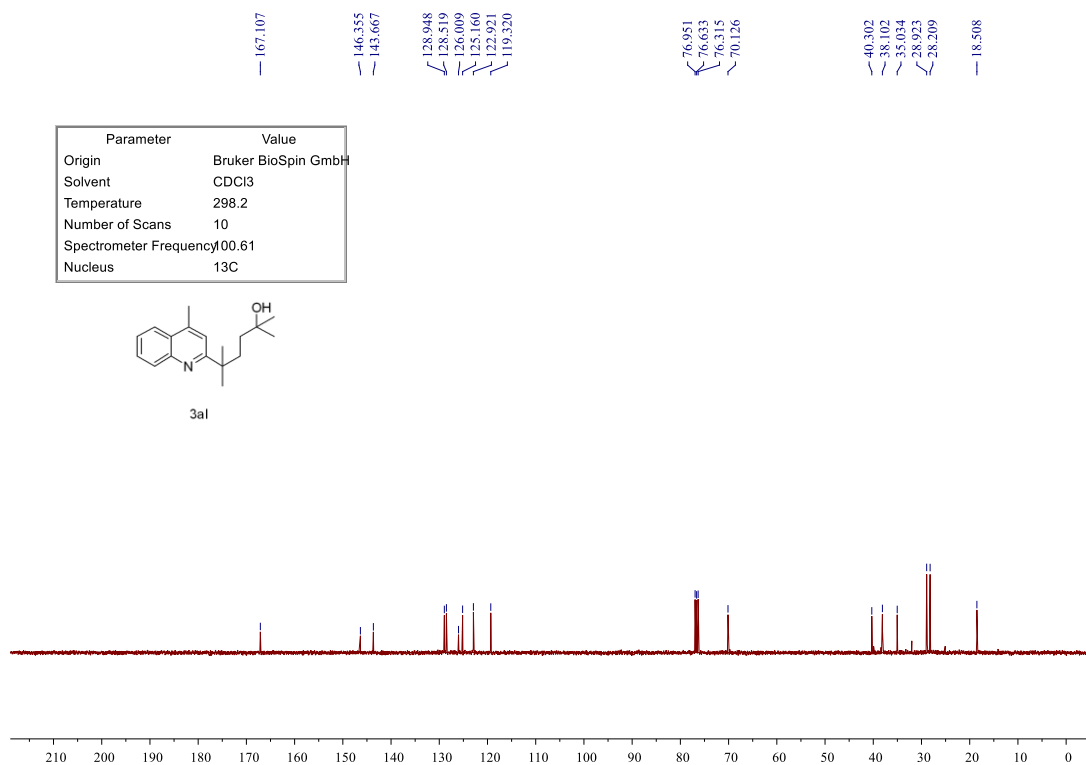

Supplementary Figure 86. <sup>13</sup>C NMR (100 MHz, CDCl<sub>3</sub>) spectra for compound 3al.

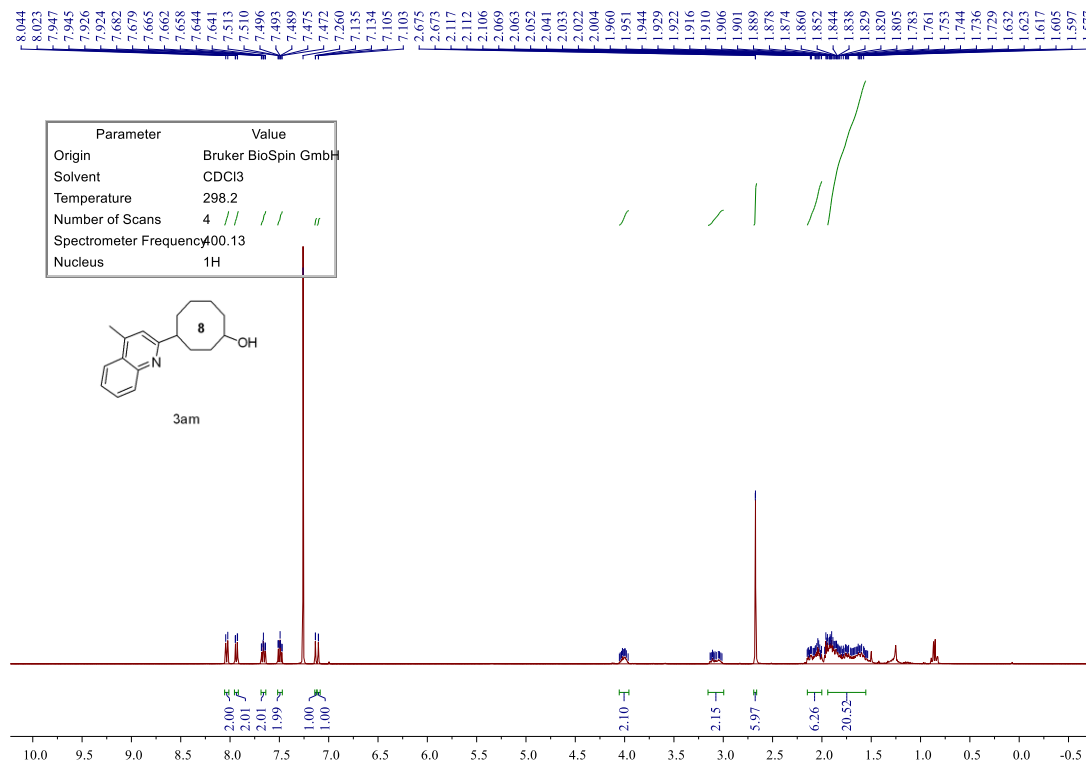

Supplementary Figure 87. <sup>1</sup>H NMR (400 MHz, CDCl<sub>3</sub>) spectra for compound 3am.

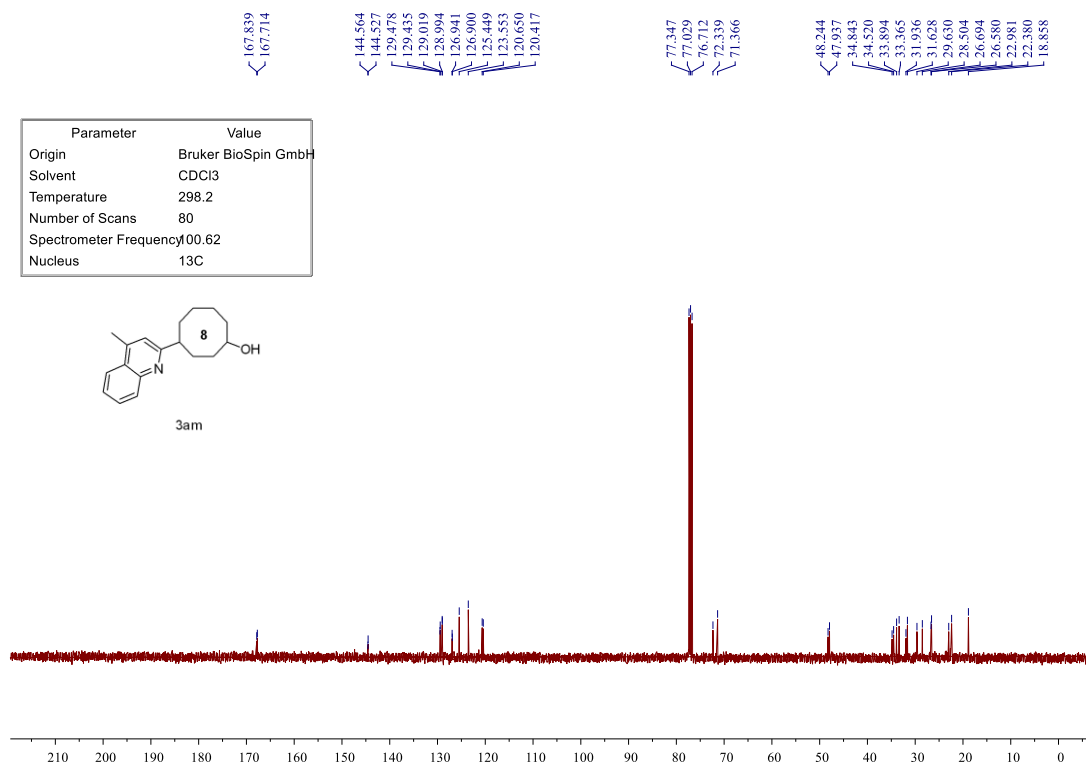

Supplementary Figure 88. <sup>13</sup>C NMR (100 MHz, CDCl<sub>3</sub>) spectra for compound 3am.

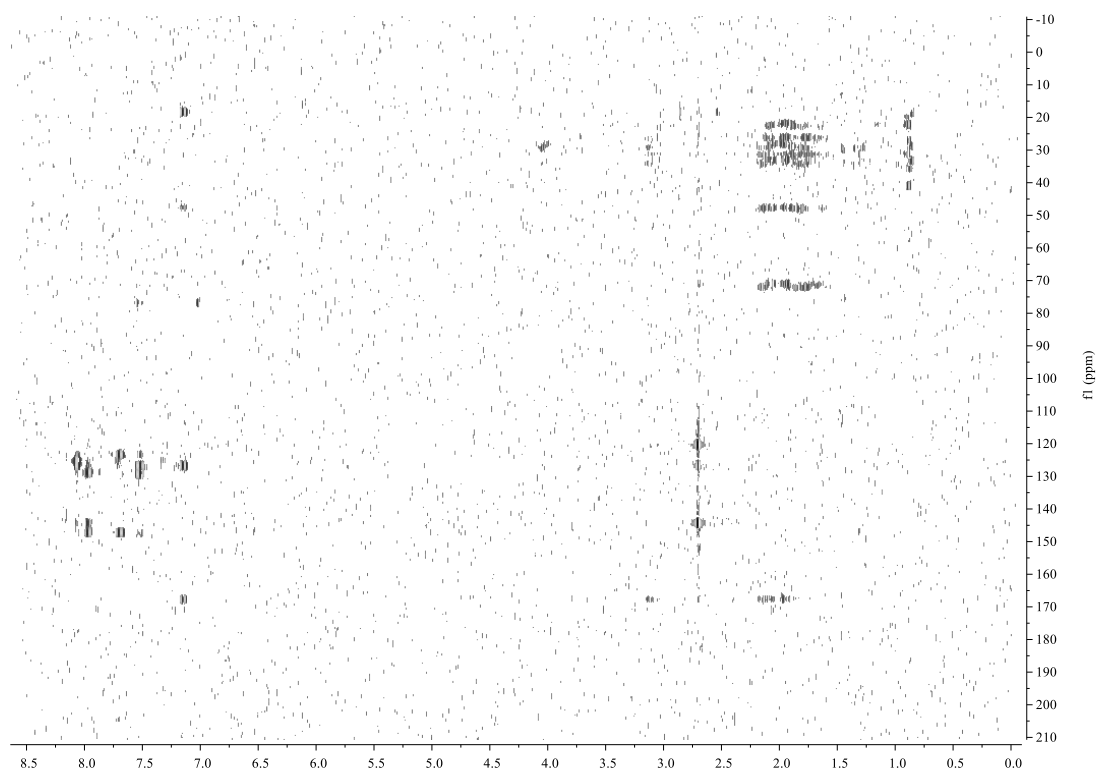

Supplementary Figure 89. HMBC spectra for compound 3am.



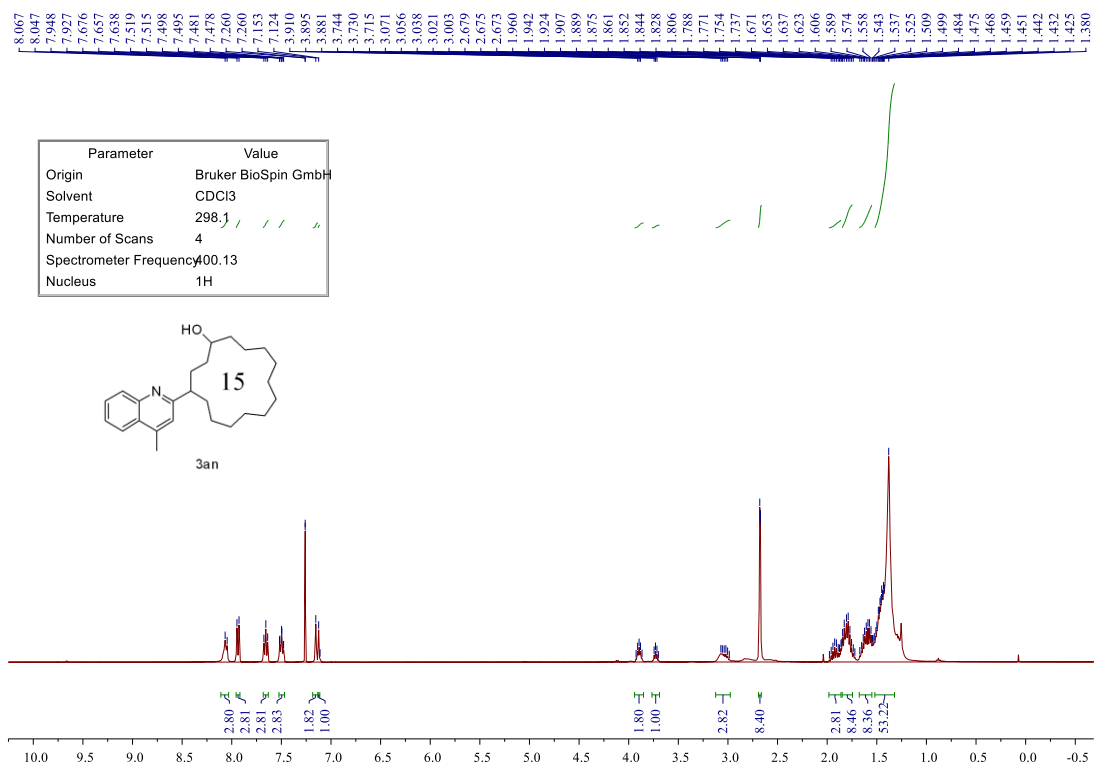

Supplementary Figure 90. <sup>1</sup>H NMR (400 MHz, CDCl<sub>3</sub>) spectra for compound 3an.

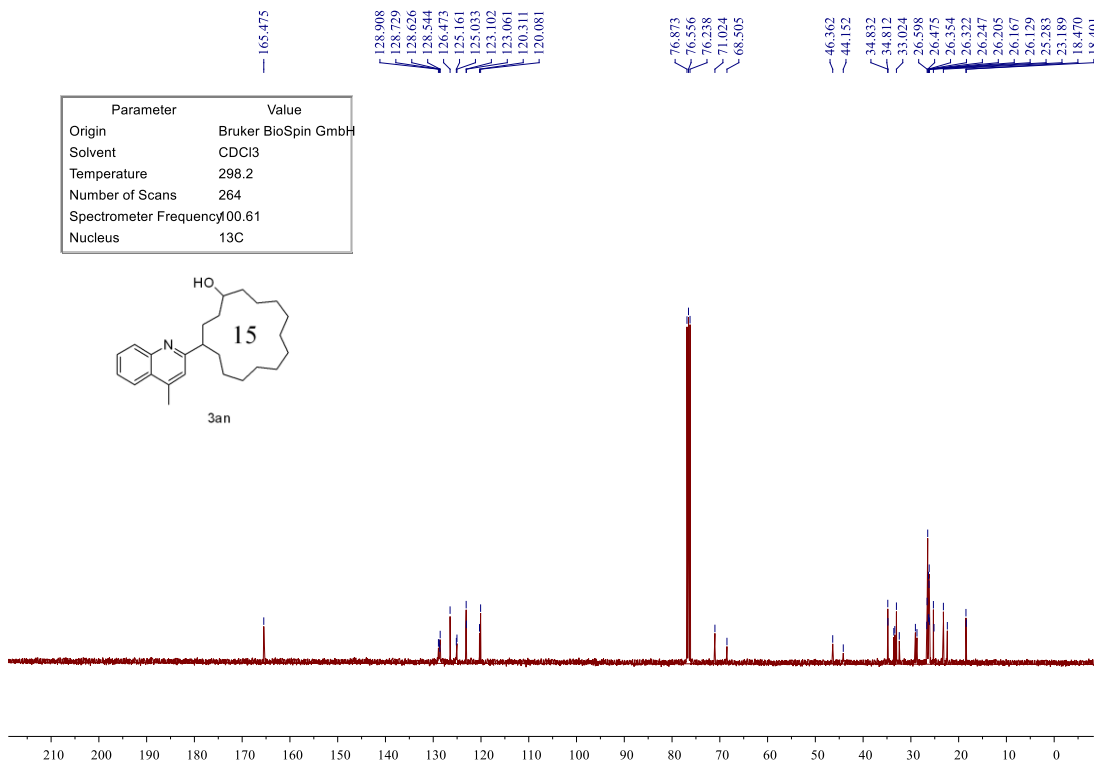

Supplementary Figure 91. <sup>13</sup>C NMR (100 MHz, CDCl<sub>3</sub>) spectra for compound 3an.

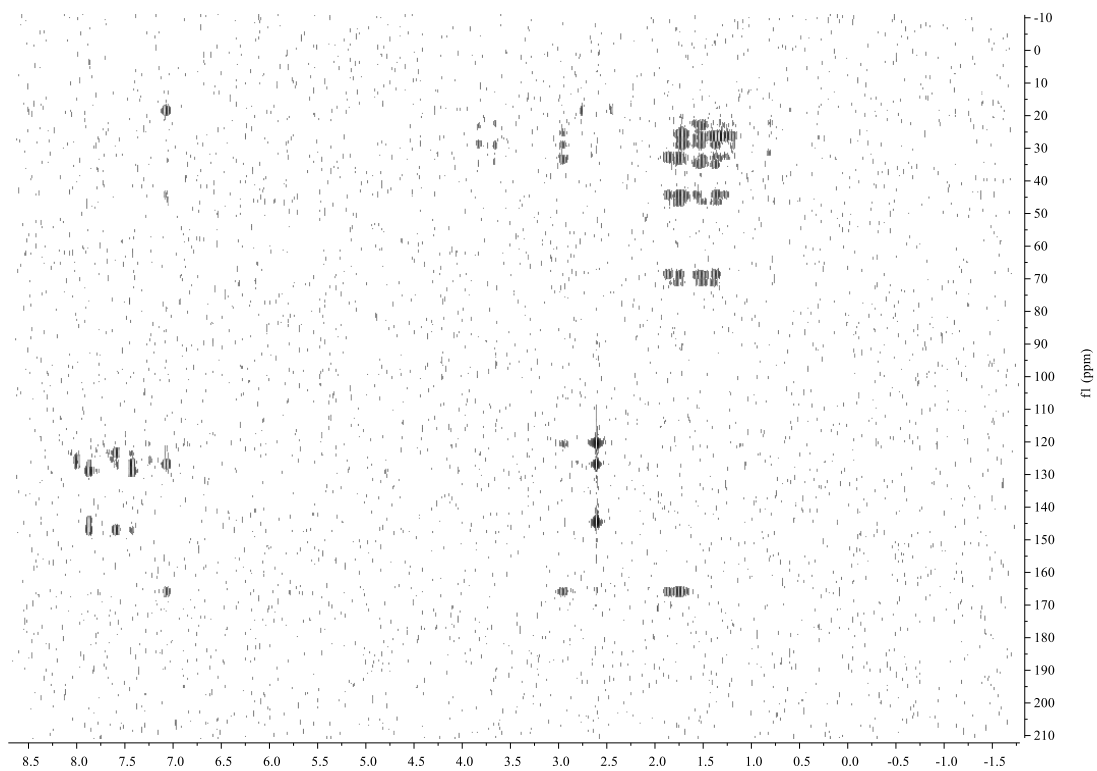

**Supplementary Figure 92. HMBC spectra for compound 3an.**

## NMR experiments for mechanistic studies

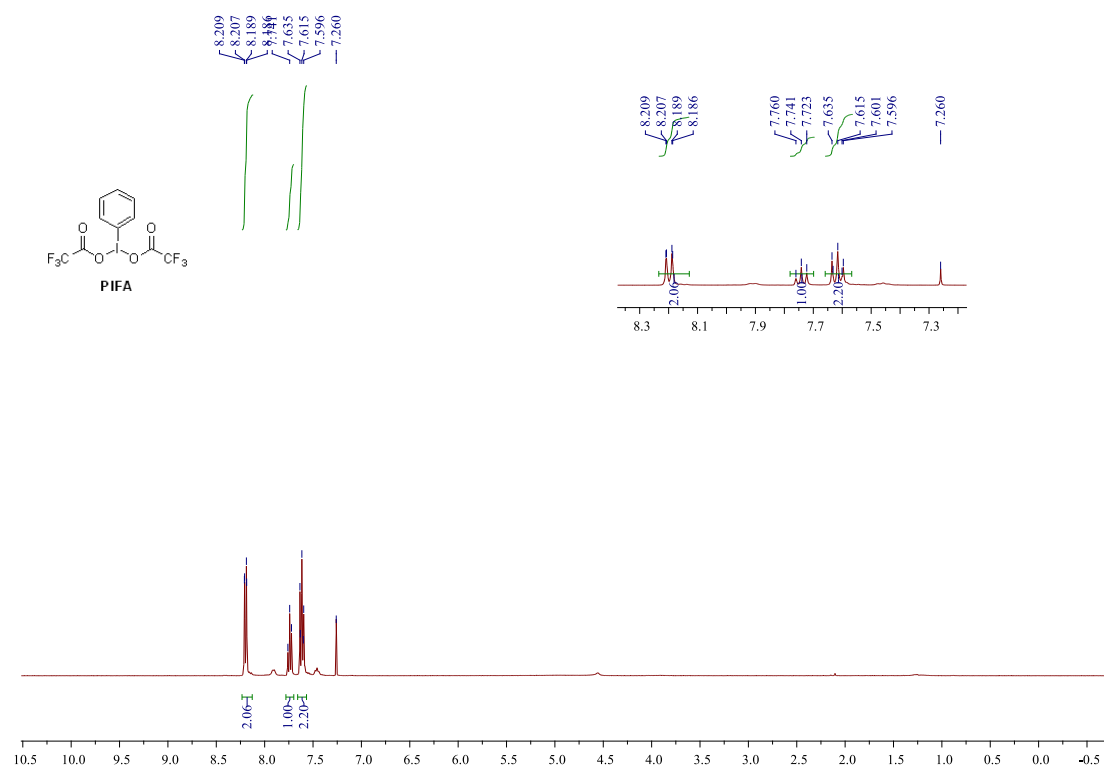

Supplementary Figure 93. PIFA-<sup>1</sup>H NMR.

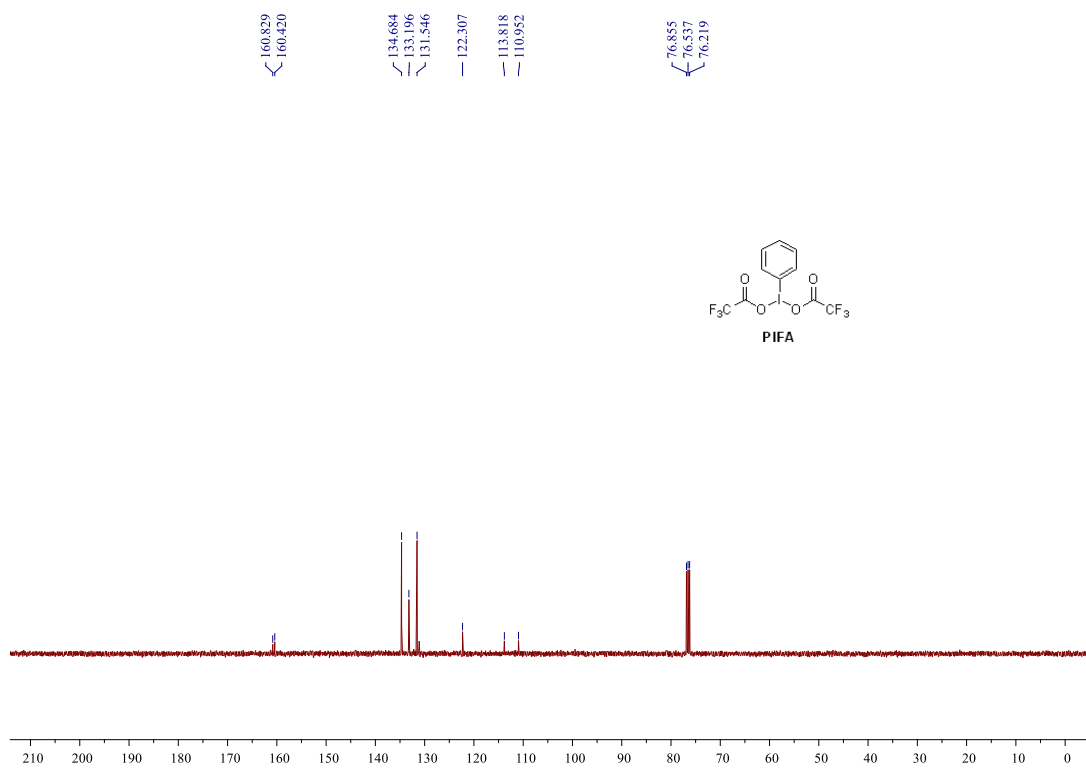

Supplementary Figure 94. PIFA-<sup>13</sup>C NMR.

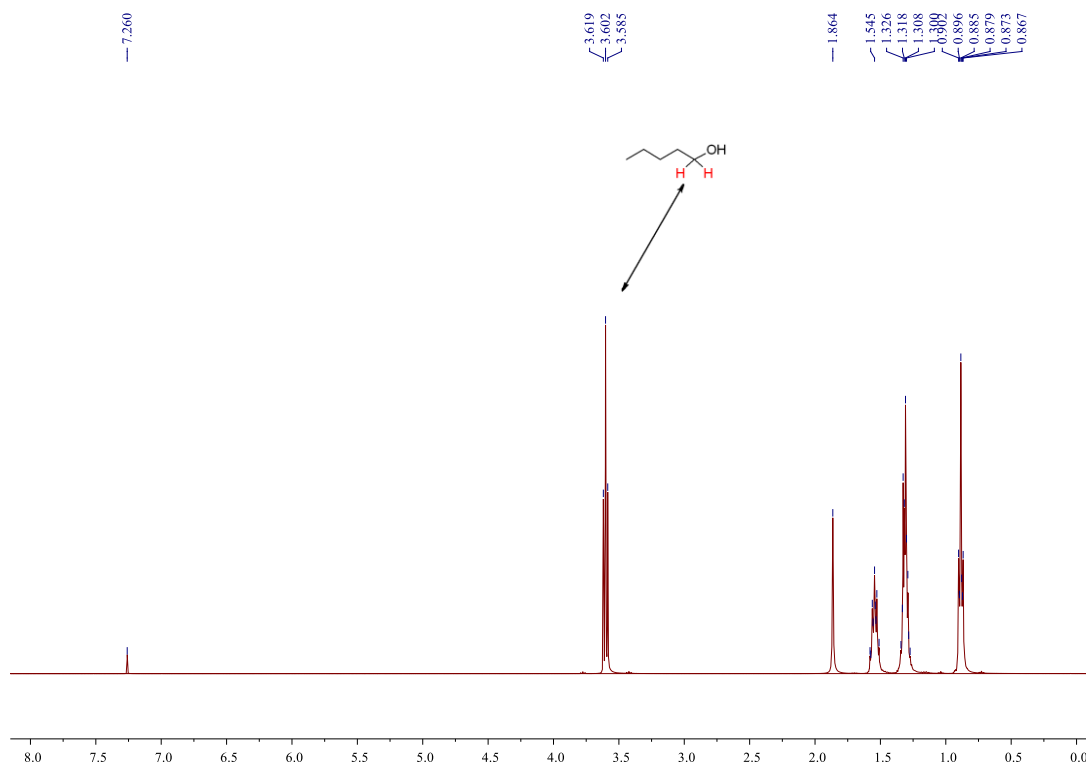

Supplementary Figure 95. *n*-Pentanol-<sup>1</sup>H NMR.

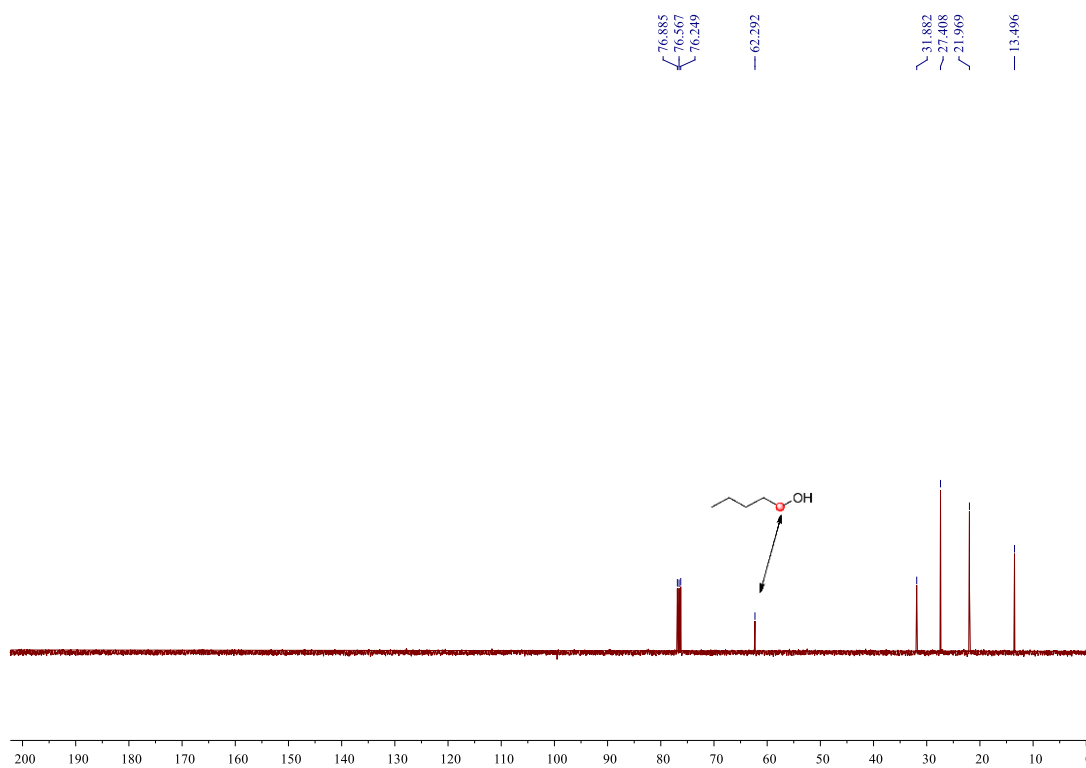

Supplementary Figure 96. *n*-Pentanol-<sup>13</sup>C NMR.

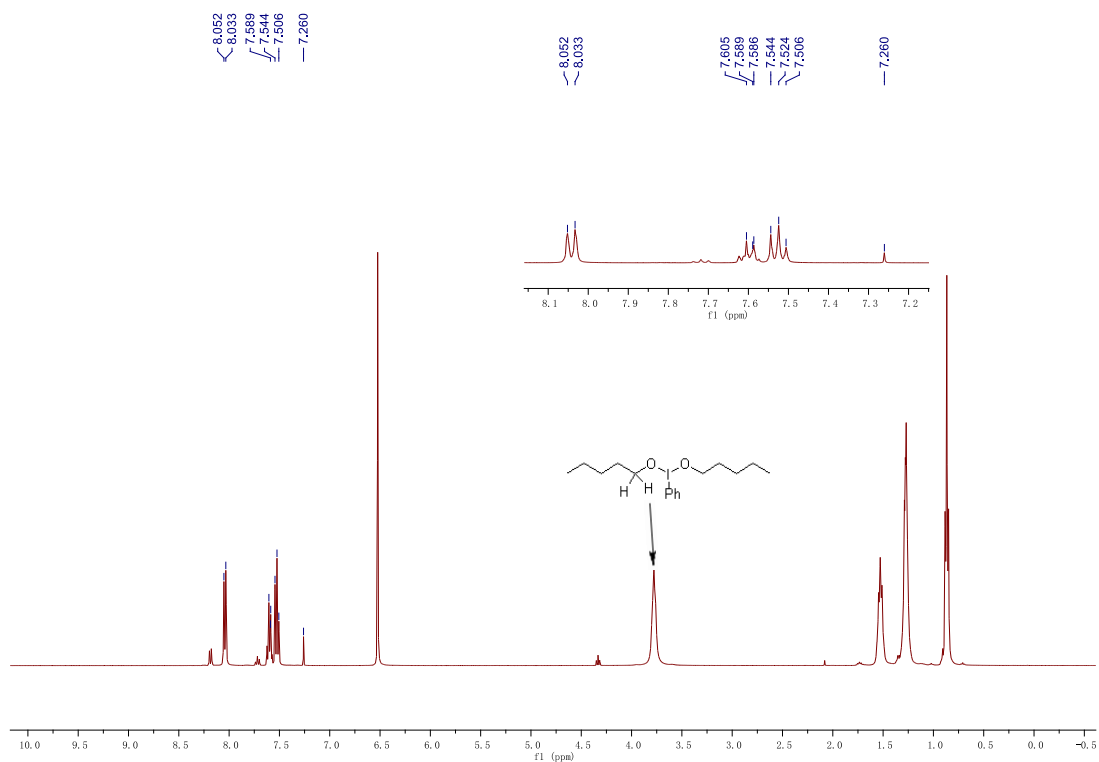

Supplementary Figure 97. Alcohol+PIFA (immediately) -<sup>1</sup>H NMR.

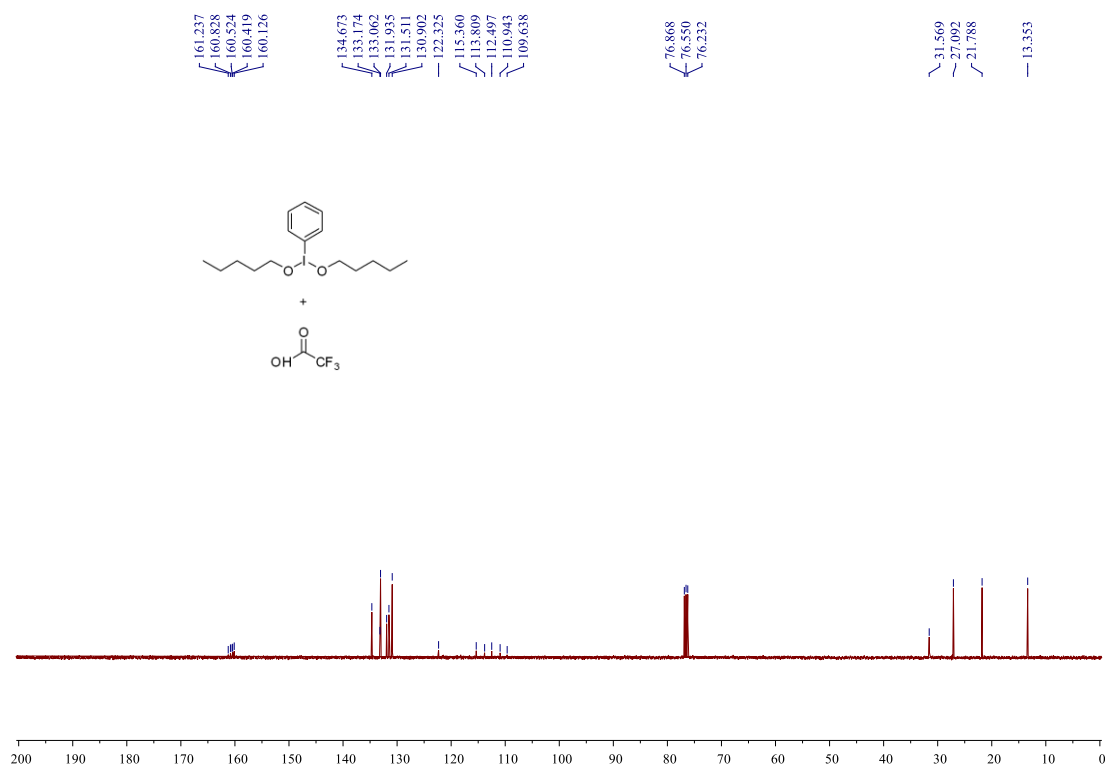

Supplementary Figure 98. Alcohol+PIFA (immediately) -<sup>13</sup>C NMR.

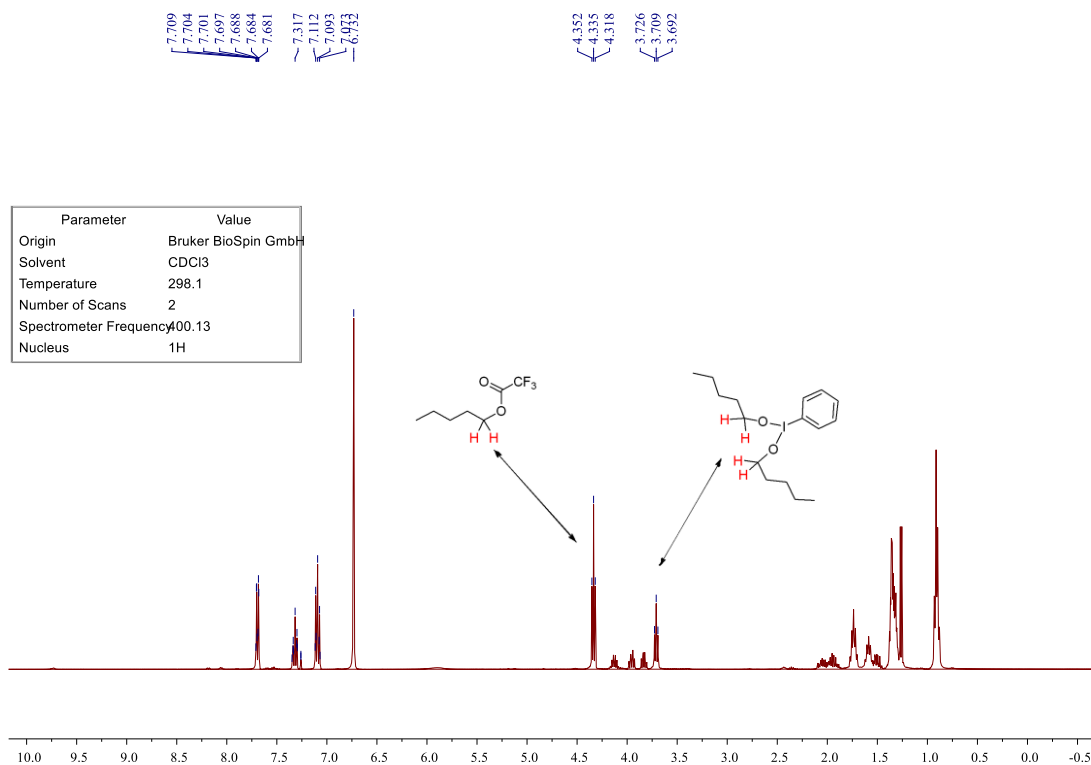

**Supplementary Figure 99. Alcohol+PIFA (after 4 h irradiation) <sup>1</sup>H NMR.**

### Absorption spectra

Solutions of different complexes were introduced to a 1 cm path length quartz cuvette equipped with a Teflon® septum and analyzed using an Agilent Cary 5000 spectrophotometer.

For the solutions of 1-pentanol and PIFA in CH<sub>3</sub>CN: 1-pentanol (0.5 mmol) and PIFA (0.23 mmol) were dissolved in CH<sub>3</sub>CN (2 mL). The mixtures were stirred for 5 min, then transformed to 1 cm path length quartz cuvettes, sealed with Teflon® septa and degassed with a stream of argon for 10 minutes.

For the solutions of PIFA in CH<sub>3</sub>CN: PIFA (0.23 mmol) were dissolved in CH<sub>3</sub>CN (2 mL). The mixtures were stirred for 5 min, then transformed to 1 cm path length quartz cuvettes, sealed with Teflon® septa and degassed with a stream of argon for 10 minutes.

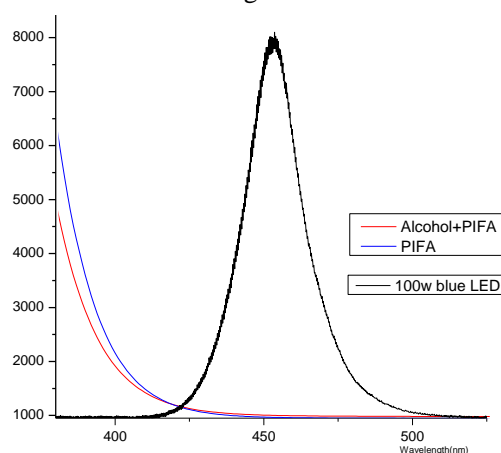

**Supplementary Figure 100. Absorption spectra of the proposed  $\text{PhI}(\text{OC}_5\text{H}_{11})_2$  and PIFA, and emission spectrum of blue LEDs**

## Radical clock experiment

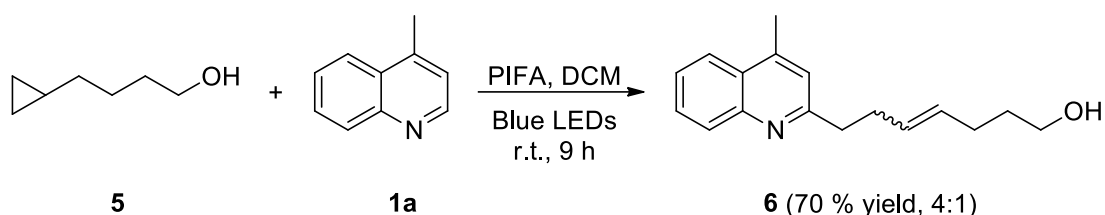

### Supplementary Figure 101. Radical clock experiment

Heteroaryl **1a** (0.1 mmol) and alcohol **5** (0.5 mmol) were loaded in a reaction vial which was subjected to evacuation/ flushing with N<sub>2</sub> three times. Then DCM (2.0 mL) followed by PIFA (0.23 mmol) was added to the mixture. The reaction was irradiated with 100 W blue LEDs and kept at rt under fan cooling. After the reaction completion monitored by TLC, the mixture was quenched by addition of aq. KOH until pH > 8 and then extracted with ethyl acetate (3 x 10 mL). The combined organic extracts were washed by brine, dried over Na<sub>2</sub>SO<sub>4</sub>, filtered, concentrated, and purified by flash column chromatography on silica gel (eluent: ethyl acetate/ petroleum ether) to give the desired product **6**.

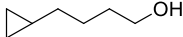 **5**: colorless oil. <sup>1</sup>H NMR (400 MHz, CDCl<sub>3</sub>) δ 3.59 (t, *J* = 6.4 Hz, 2H), 2.21 (s, 1H), 1.60-1.51 (m, 2H), 1.46-1.37 (m, 2H), 1.18 (dd, *J* = 14.4, 7.2 Hz, 2H), 0.67-0.57 (m, 1H), 0.39-0.33 (m, 2H), -0.01--0.06 (m, 2H). <sup>13</sup>C NMR (100 MHz, CDCl<sub>3</sub>) δ 62.9, 34.5, 32.6, 25.8, 10.8, 4.3. FT-IR: ν (cm<sup>-1</sup>) 3329, 3088, 3009, 2919, 2872, 2058, 1652, 1437, 1415, 1326, 1256. HRMS [ESI] calcd for C<sub>7</sub>H<sub>15</sub>O [M+H]<sup>+</sup> 115.1117, found 115.1119.

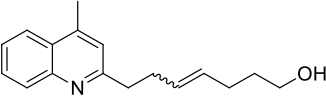 **6** (ratio ~ 4:1): yellow oil. <sup>1</sup>H NMR (400 MHz, CDCl<sub>3</sub>) δ 8.10-8.04 (m, 1.25H, two isomers), 7.97-7.92 (m, 1.25H, two isomers), 7.70-7.64 (m, 1.25H, two isomers), 7.53-7.48 (m, 1.25H, two isomers), 7.16-7.12 (m, 1.25H, two isomers), 5.58-5.35 (m, 2.5H, two isomers), 3.61-3.55 (m, 2.5H, two isomers), 3.02-2.95 (m, 2.5H, two isomers), 2.69-2.66 (m, 3.75H, two isomers), 2.62-2.55 (m, 0.5H, single isomer), 2.53-2.46 (m, 2H, single isomer), 2.18-2.11 (m, 0.5H, single isomer), 2.09-2.02 (m, 2H, single isomer), 1.89 (br, 1.25H, two isomers), 1.63-1.51 (m, 2.5H, two isomers). <sup>13</sup>C NMR (100 MHz, CDCl<sub>3</sub>) δ 161.8 (single isomer) & 161.7 (single isomer), 147.3 (two isomers), 144.6 (two isomers), 130.6 (two isomers), 130.1 (single isomer) & 129.6 (single isomer), 129.2 (single isomer) & 129.2 (single isomer), 129.0 (single isomer) & 128.9 (single isomer), 126.8 (two isomers), 125.7 (single isomer) & 125.6 (single isomer), 123.6 (two isomers), 122.3 (single isomer) & 122.2 (single isomer), 62.1 (single isomer) & 61.5 (single isomer), 39.0 (single isomer) & 38.8 (single isomer), 32.8 (two isomers), 32.3 (single isomer) & 32.2 (single isomer), 28.9 (single isomer) & 27.6 (single isomer), 23.4 (single isomer) & 18.7 (single isomer). FT-IR: ν (cm<sup>-1</sup>) 2928, 2849, 2356, 2333, 1628, 1603, 1555, 1509. HRMS [ESI] calcd for C<sub>17</sub>H<sub>22</sub>NO<sup>+</sup> [M+H]<sup>+</sup> 256.1696, found 256.1710.

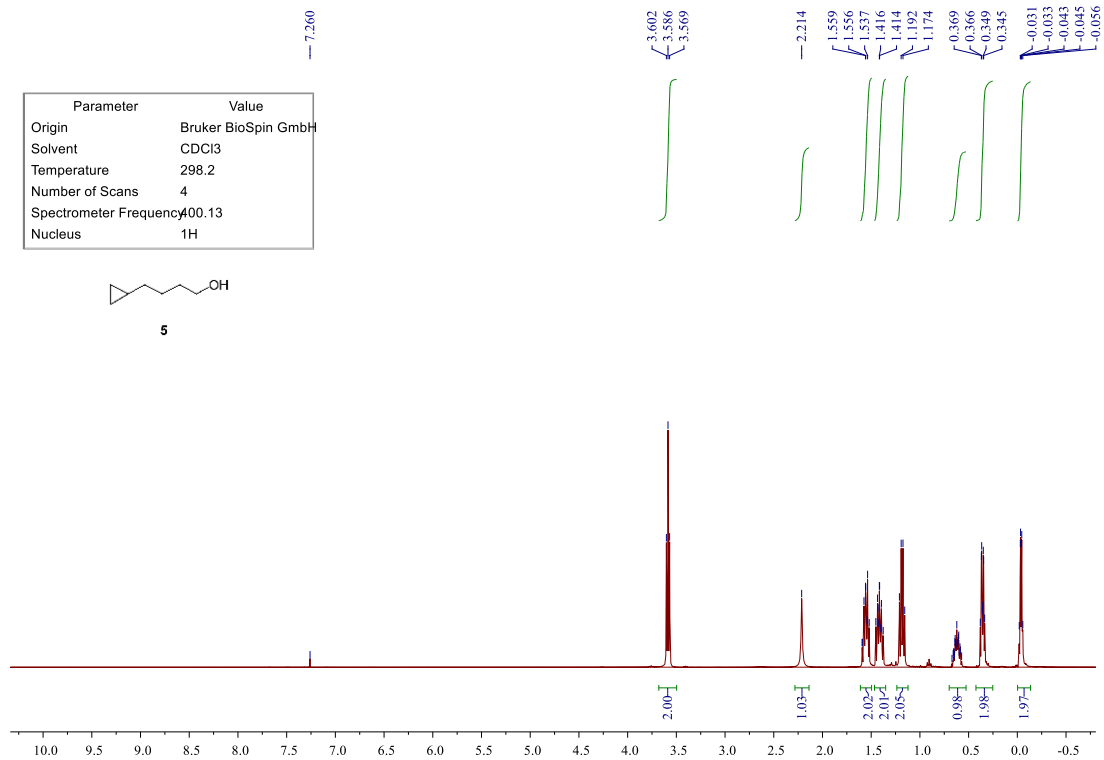

Supplementary Figure 102. <sup>1</sup>H NMR (400 MHz, CDCl<sub>3</sub>) spectra for compound 5.

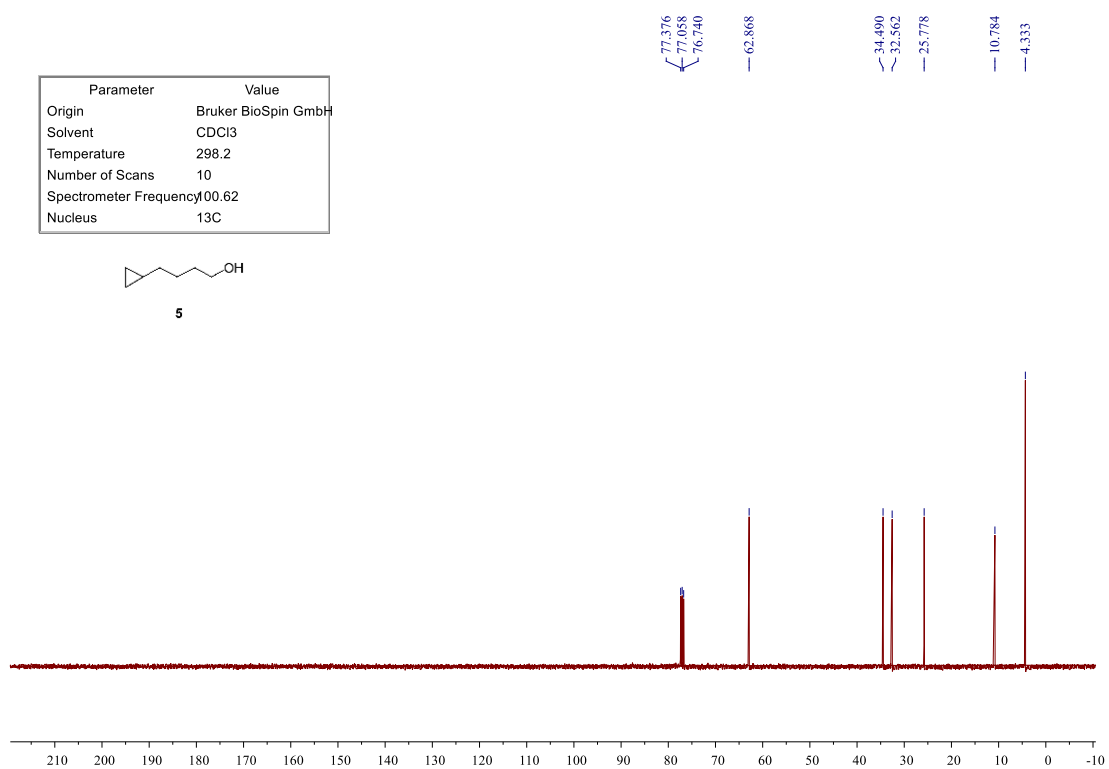

Supplementary Figure 103. <sup>13</sup>C NMR (100 MHz, CDCl<sub>3</sub>) spectra for compound 5.



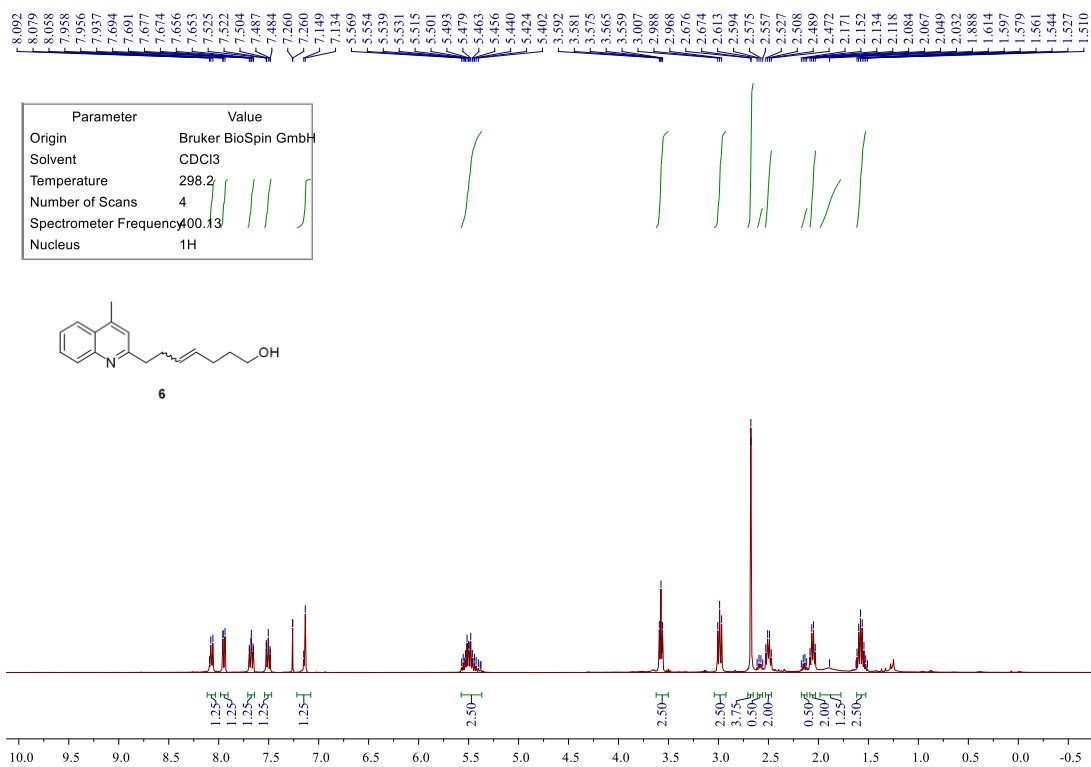

Supplementary Figure 104. <sup>1</sup>H NMR (400 MHz, CDCl<sub>3</sub>) spectra for compound 6.

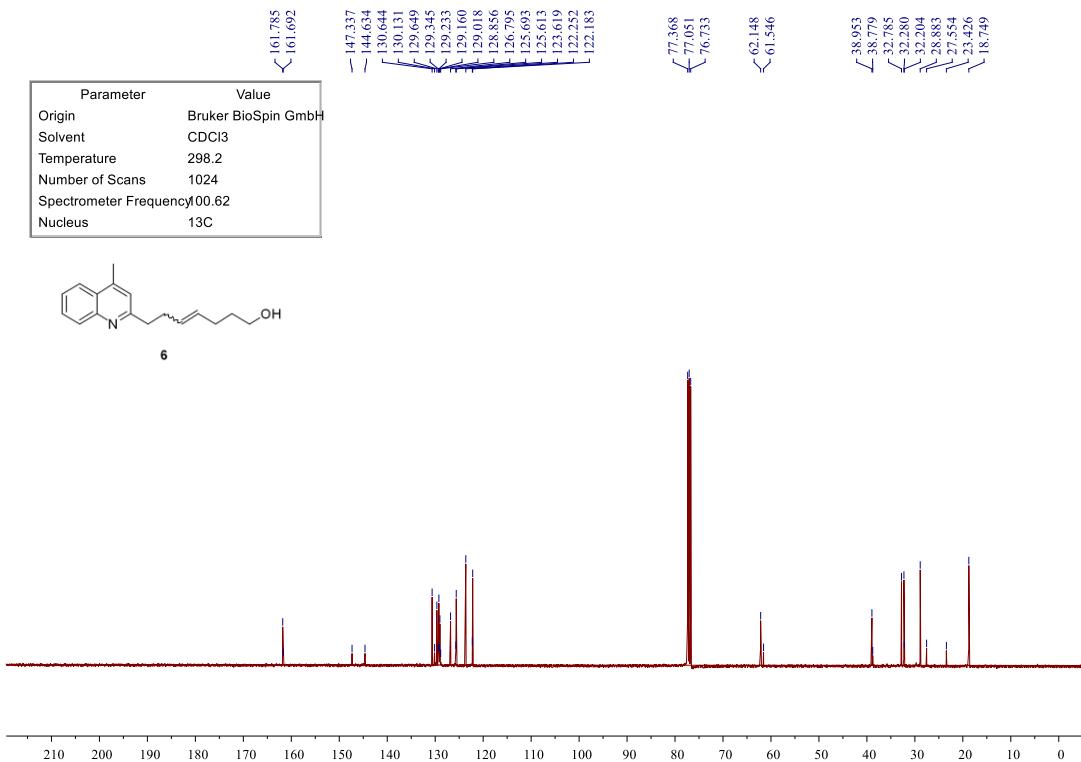

Supplementary Figure 105. <sup>13</sup>C NMR (100 MHz, CDCl<sub>3</sub>) spectra for compound 6.
